# Supplementary material for: Combination of the Endogenous lhcsr1 Promoter and Codon Usage Optimization Boosts Protein Expression in the Moss Physcomitrella patens
Source: PubMed Central journal article supplement (PMC5671511; doi:10.3389/fpls.2017.01842), 2017-10-31

Codon usage frequency spectrum normalized per aa per gene  
group starting from highest expression values #genes: 0

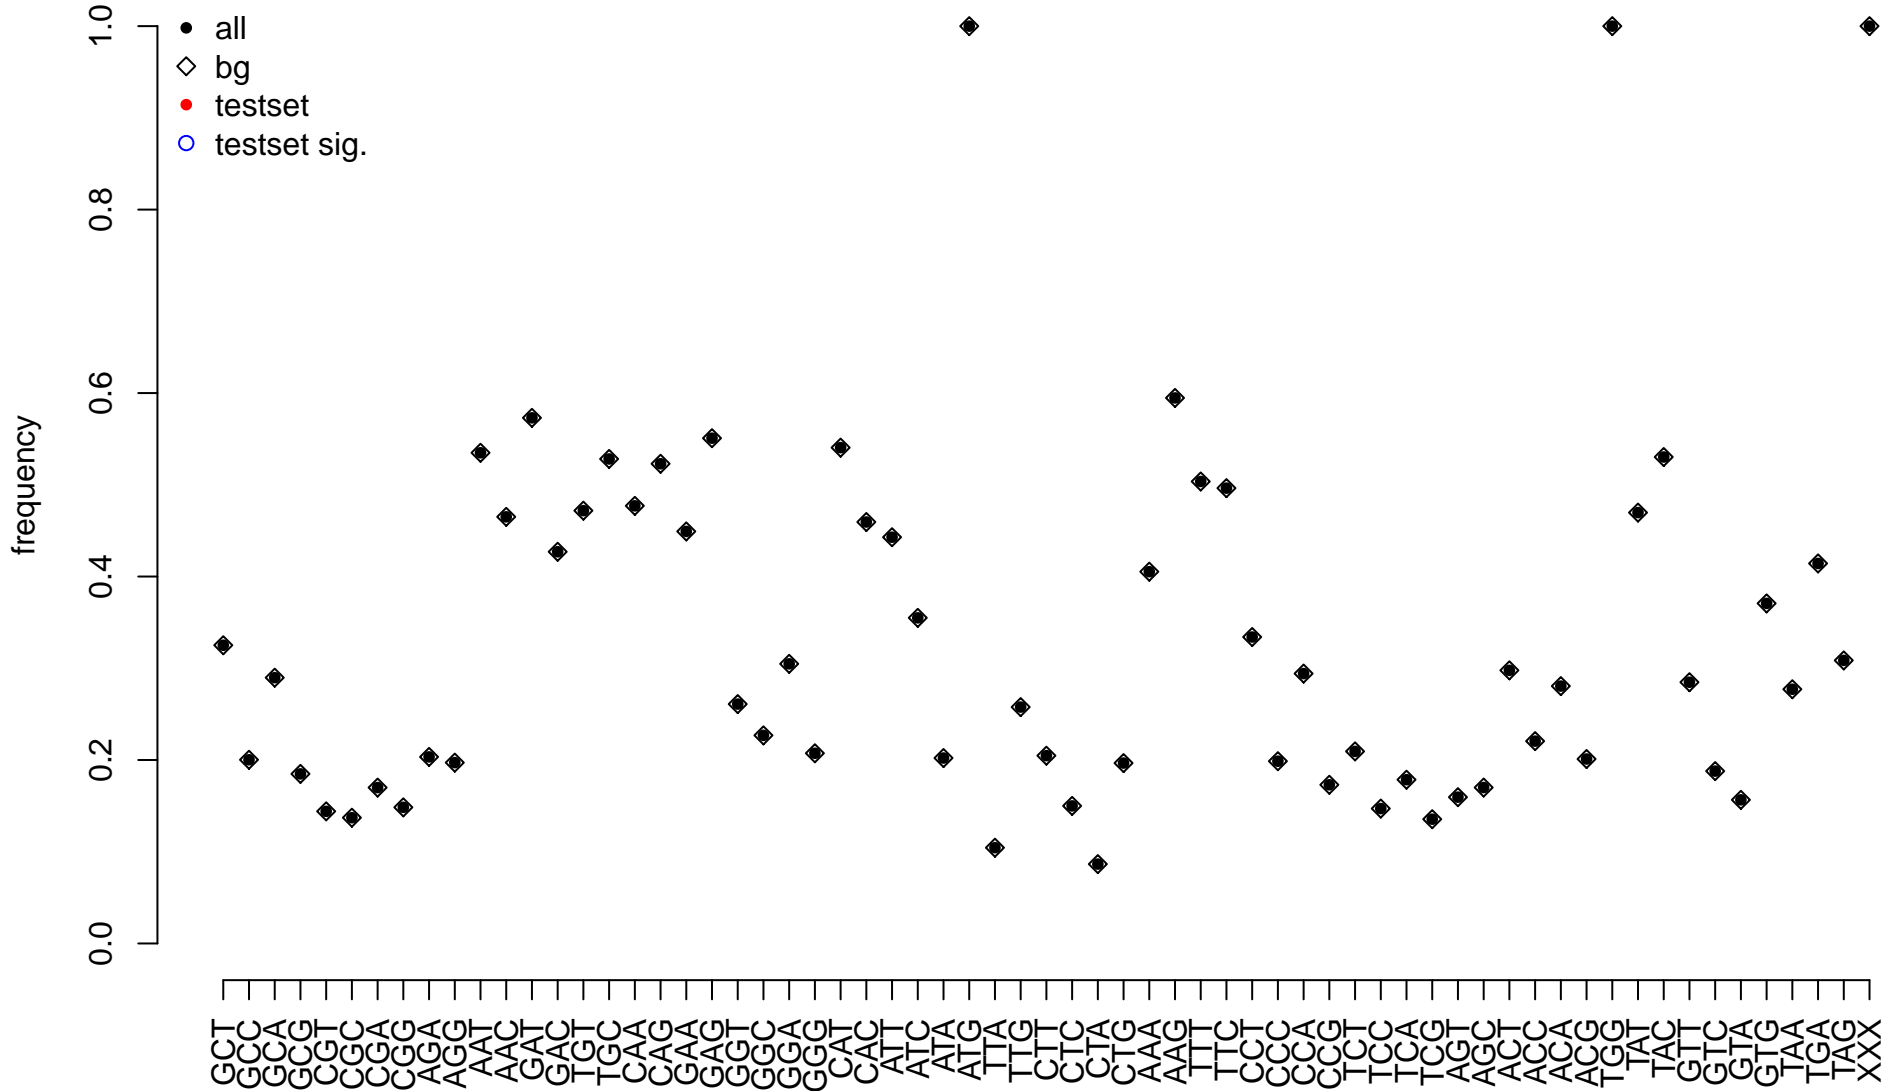

median expression values  
#genes: 0

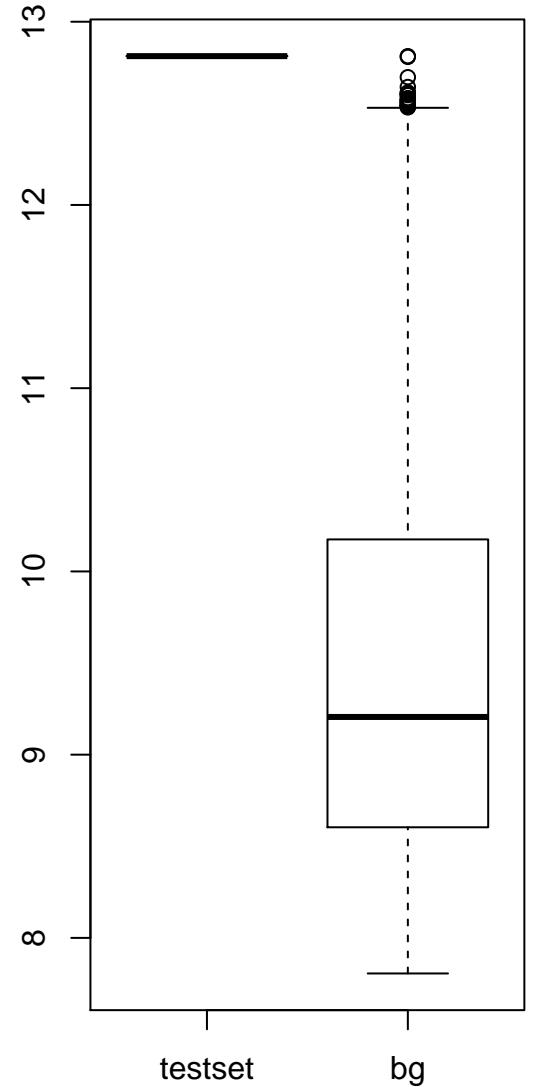

**Codon usage frequency spectrum normalized per aa per gene**  
**group starting from highest expression values #genes: 96**

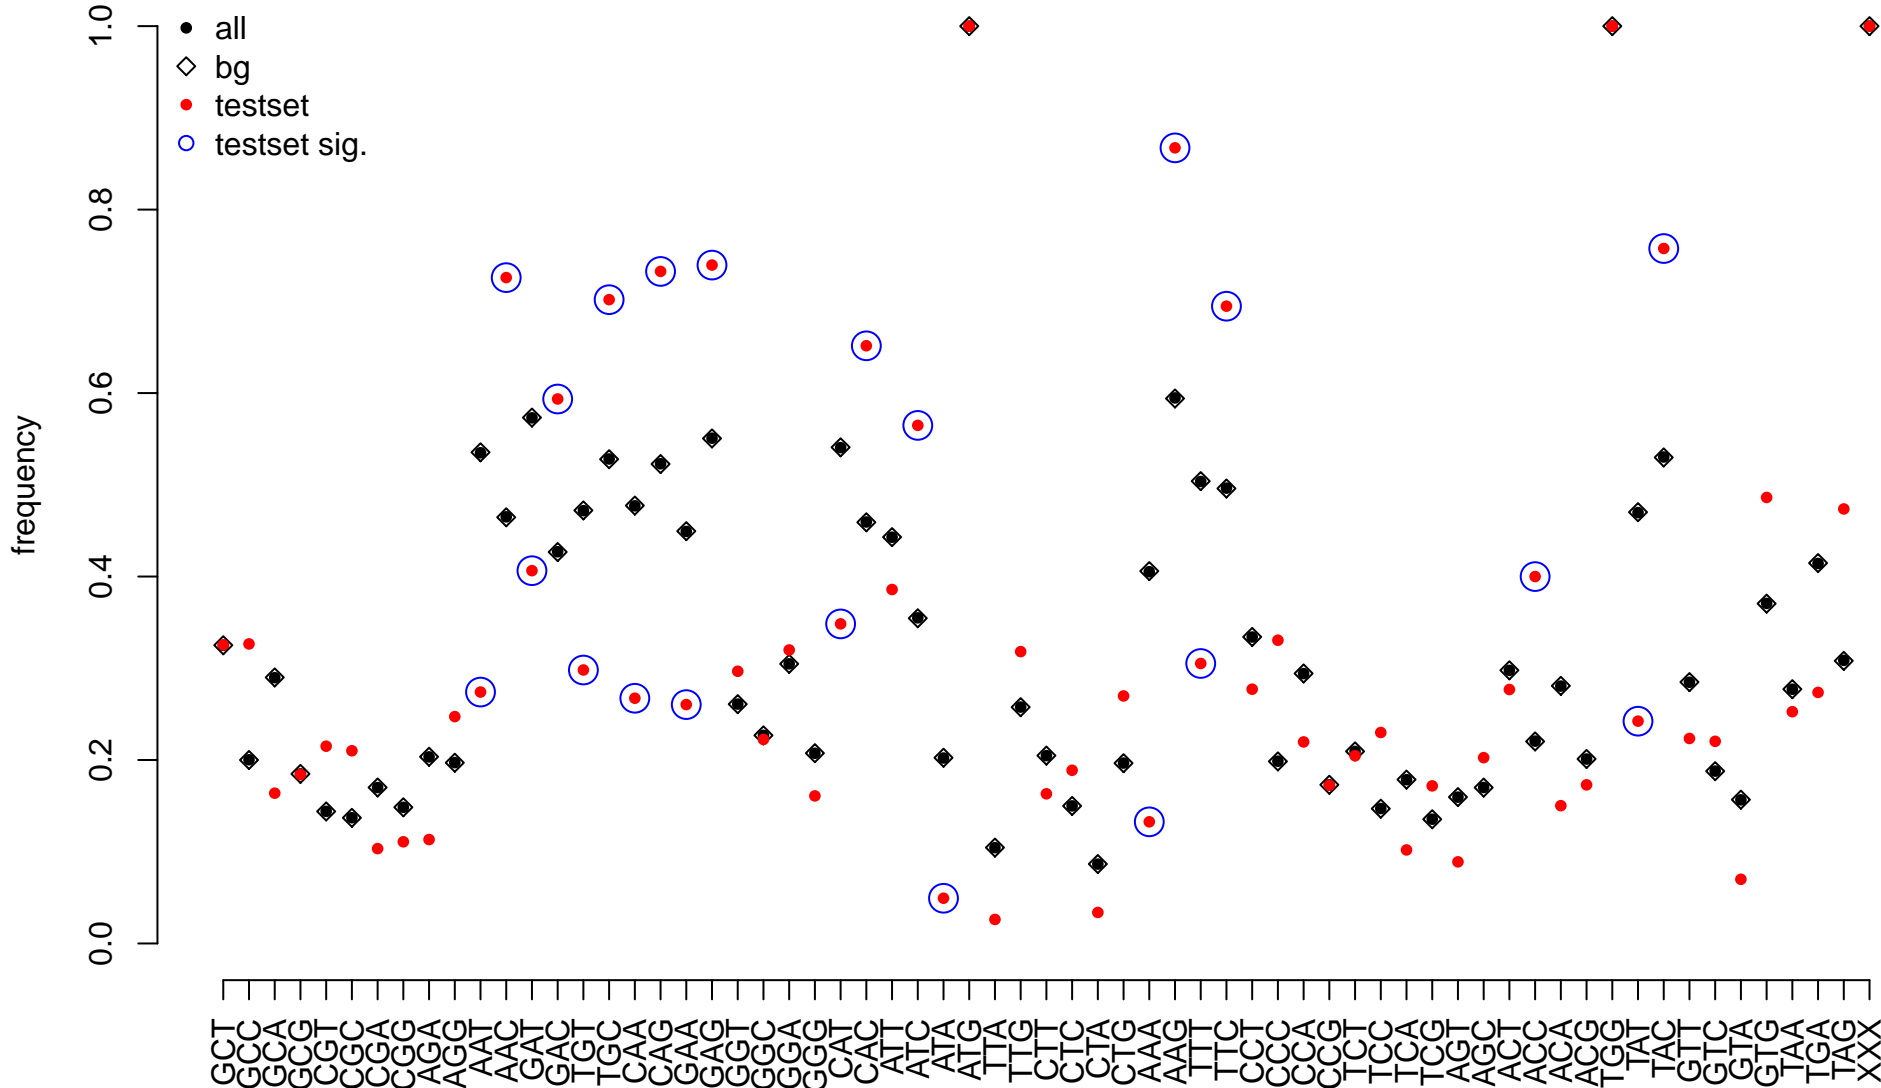

**median expression values**  
**#genes: 96**

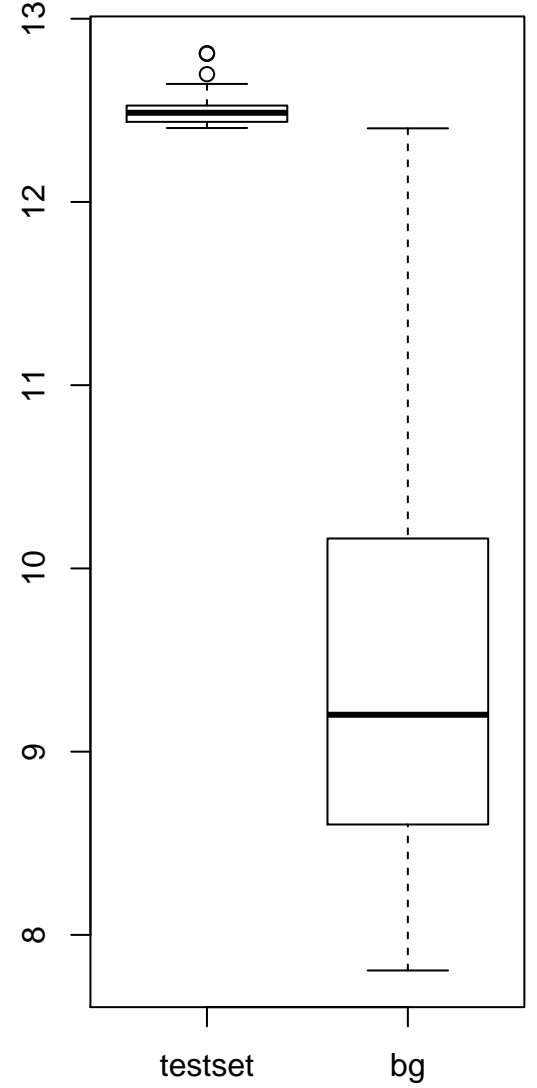

**Codon usage frequency spectrum normalized per aa per gene  
group starting from highest expression values #genes: 192**

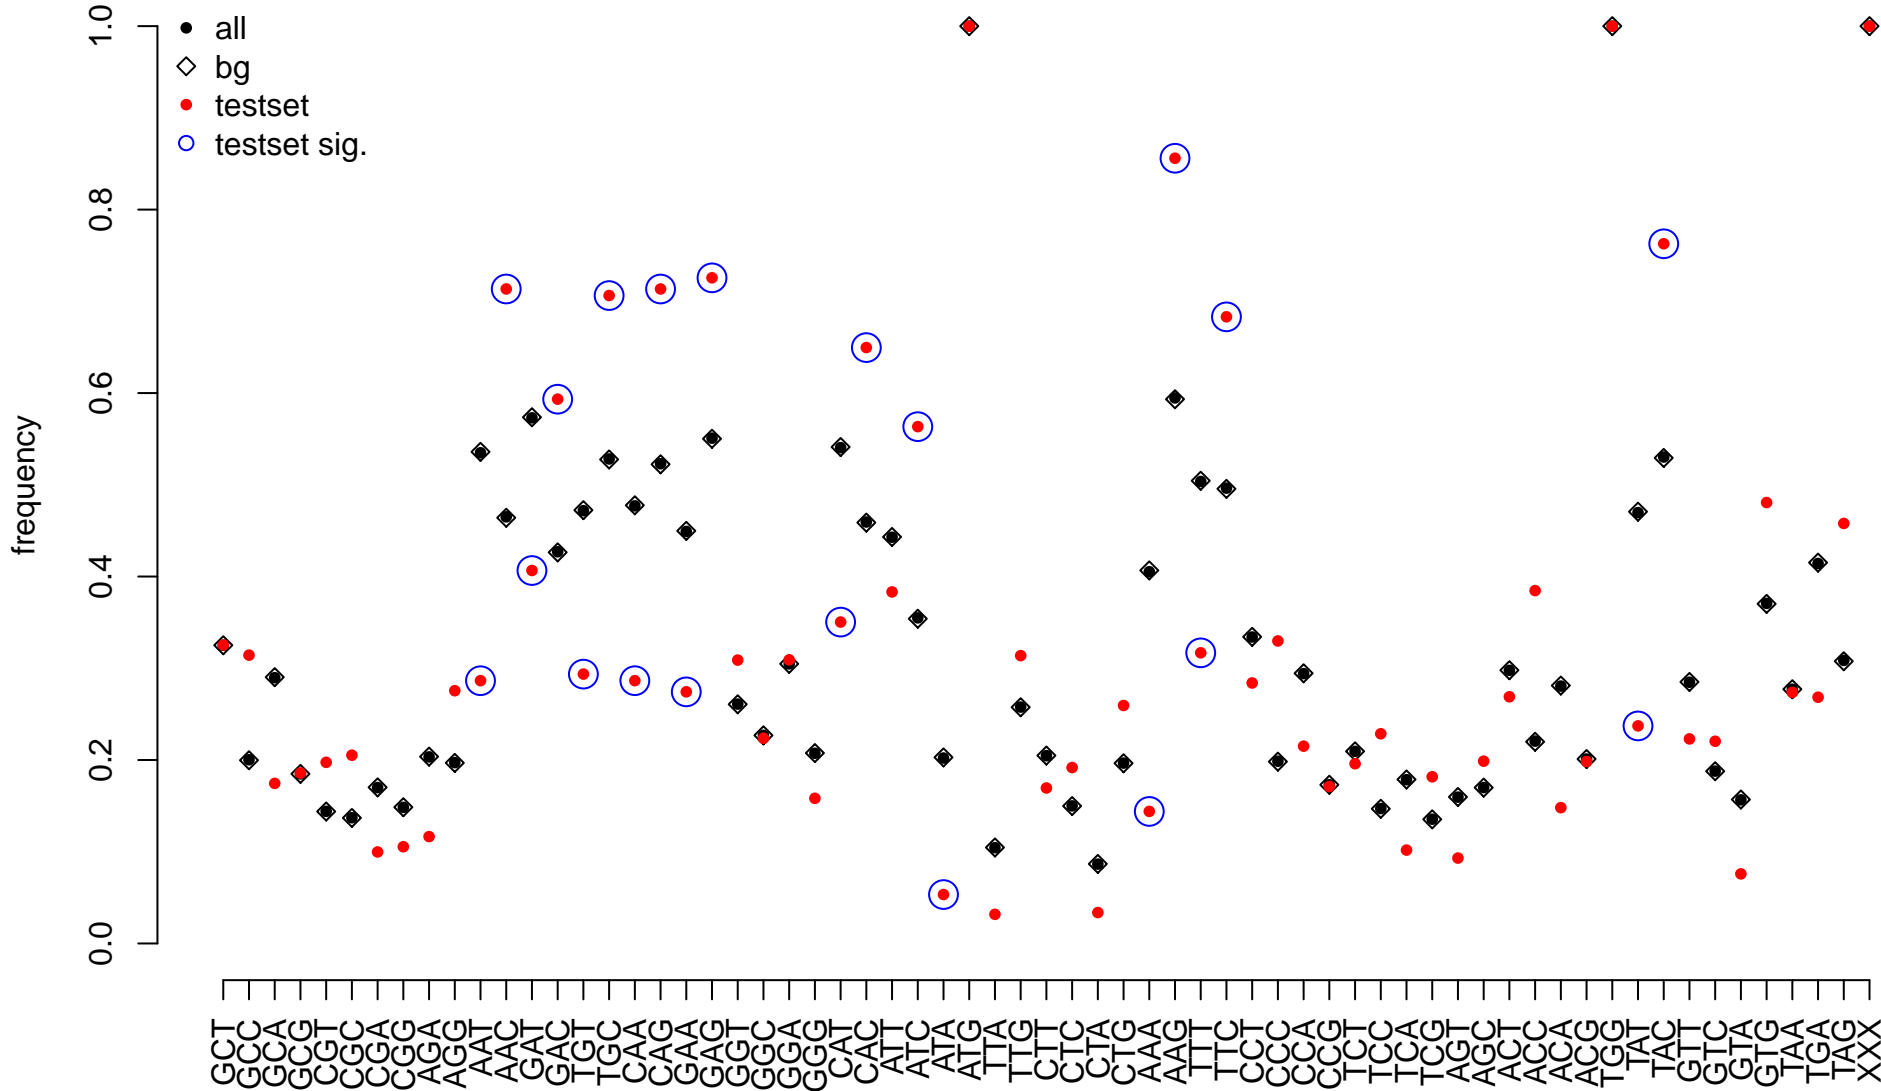

**median expression values  
#genes: 192**

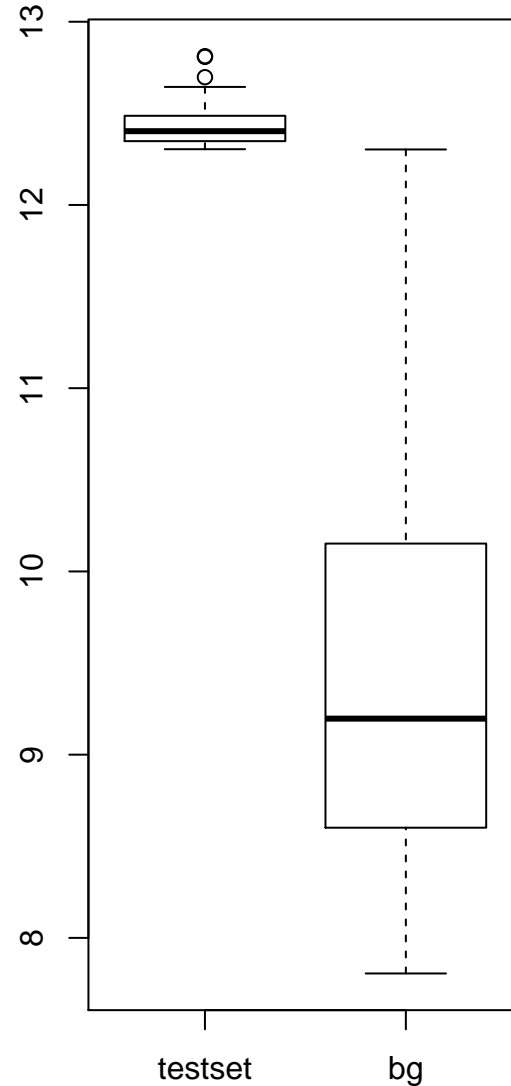

Codon usage frequency spectrum normalized per aa per gene  
group starting from highest expression values #genes: 291

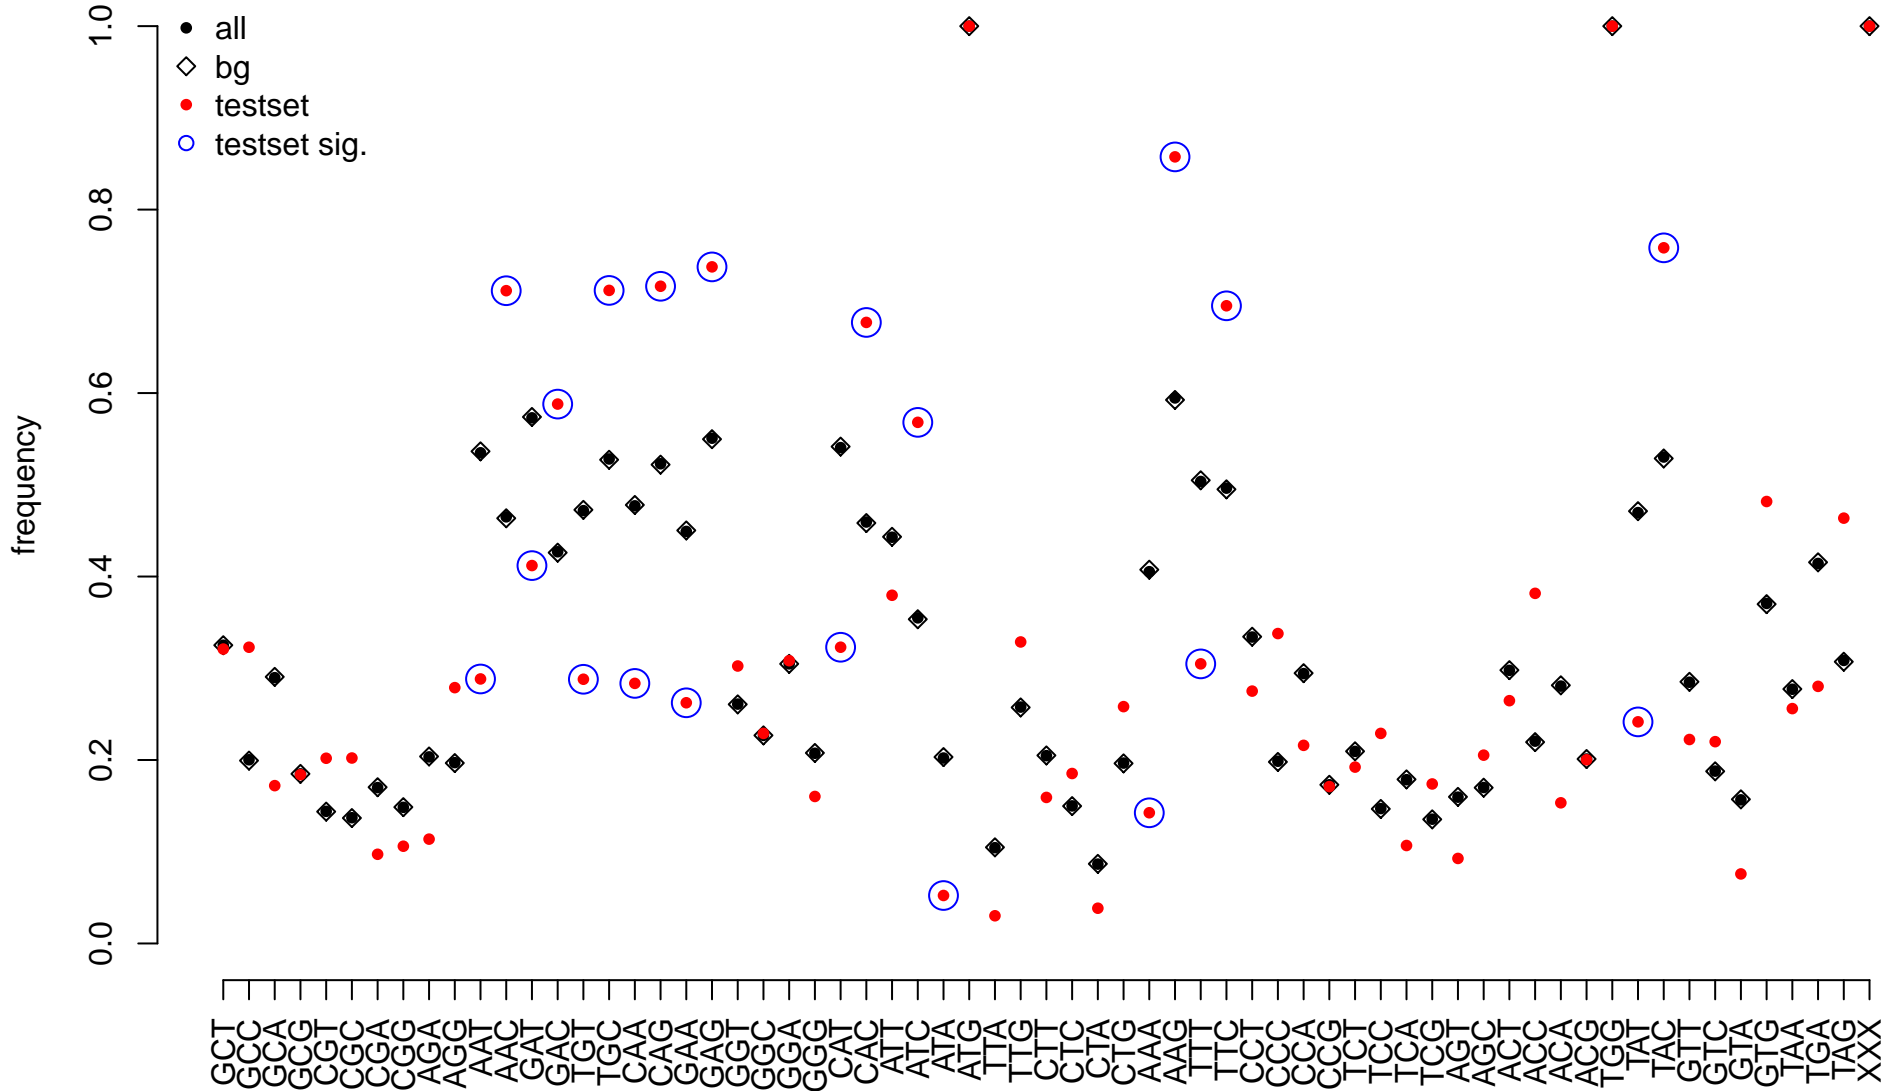

median expression values  
#genes: 291

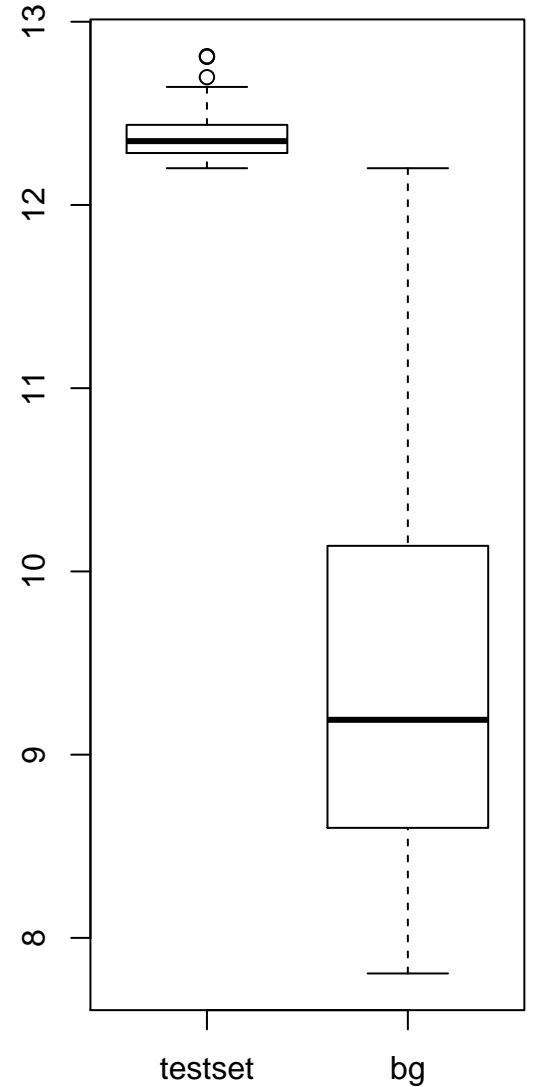

**Codon usage frequency spectrum normalized per aa per gene**  
**group starting from highest expression values #genes: 389**

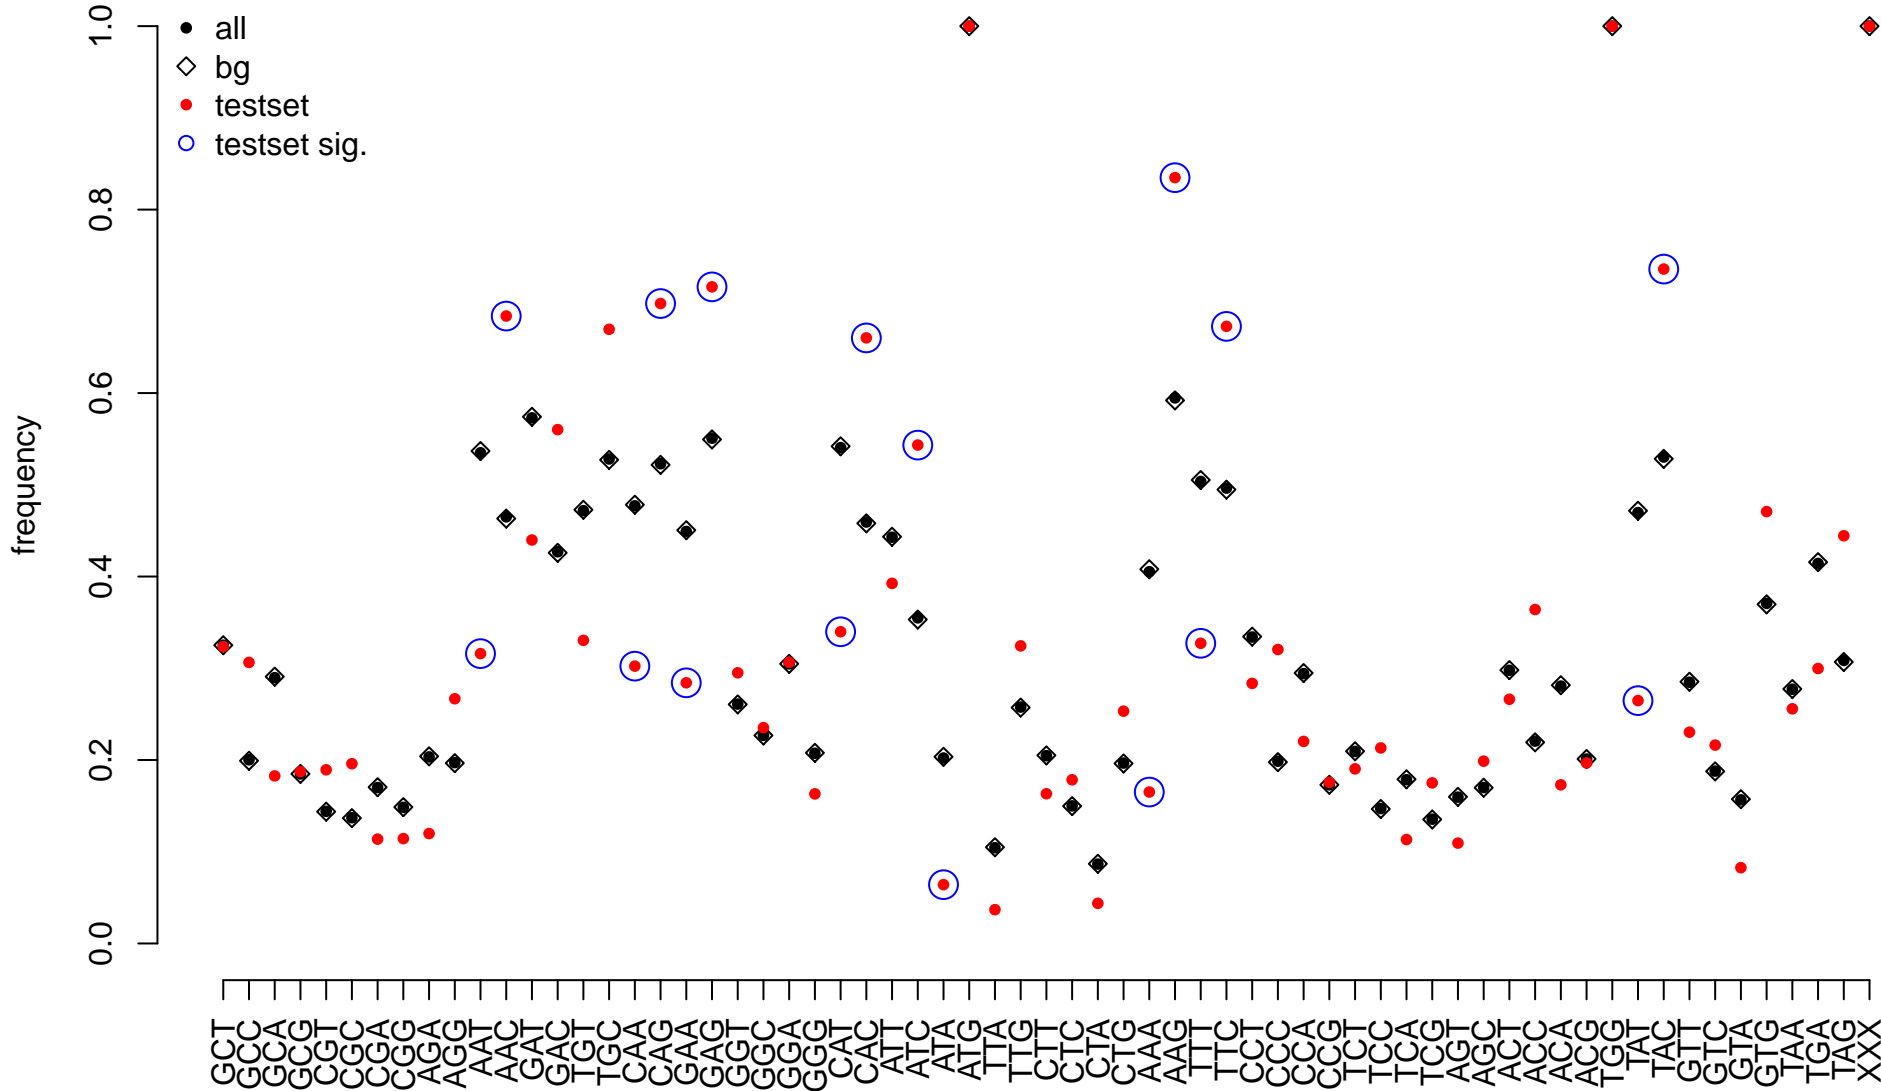

**median expression values**  
**#genes: 389**

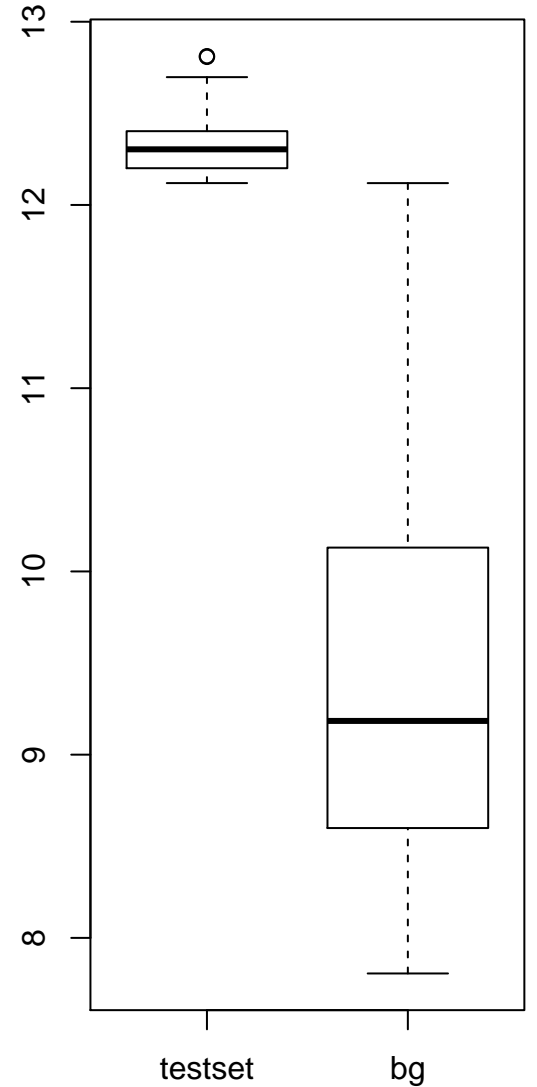

**Codon usage frequency spectrum normalized per aa per gene**  
**group starting from highest expression values #genes: 488**

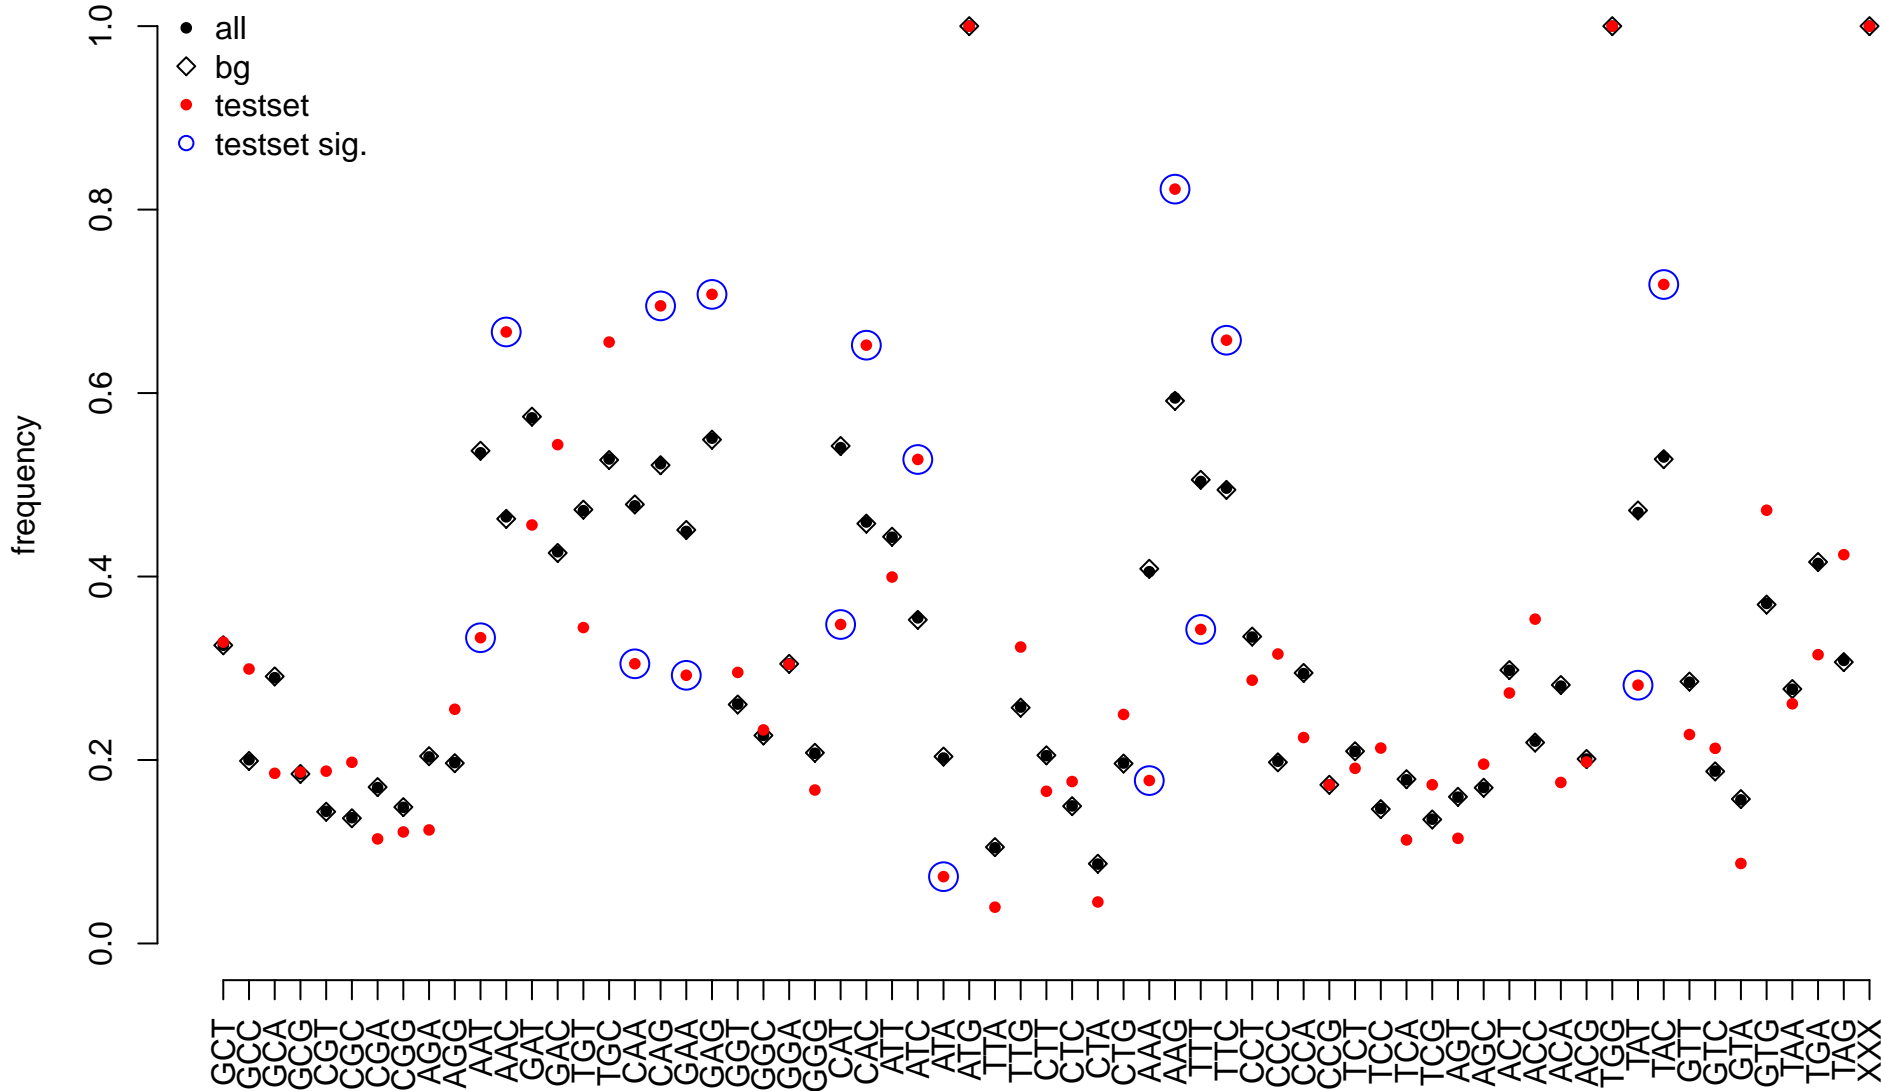

**median expression values**  
**#genes: 488**

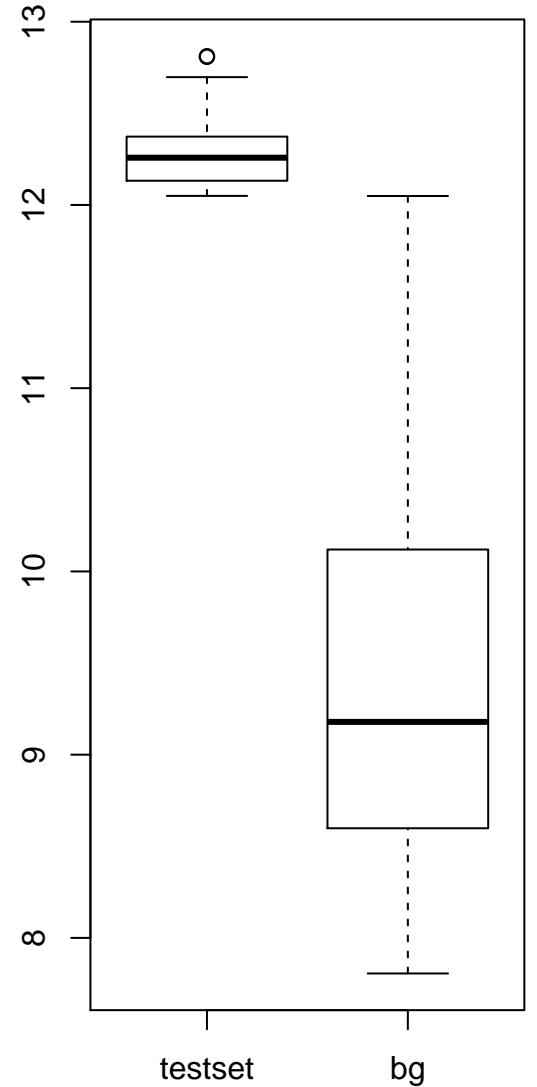

**Codon usage frequency spectrum normalized per aa per gene**  
**group starting from highest expression values #genes: 587**

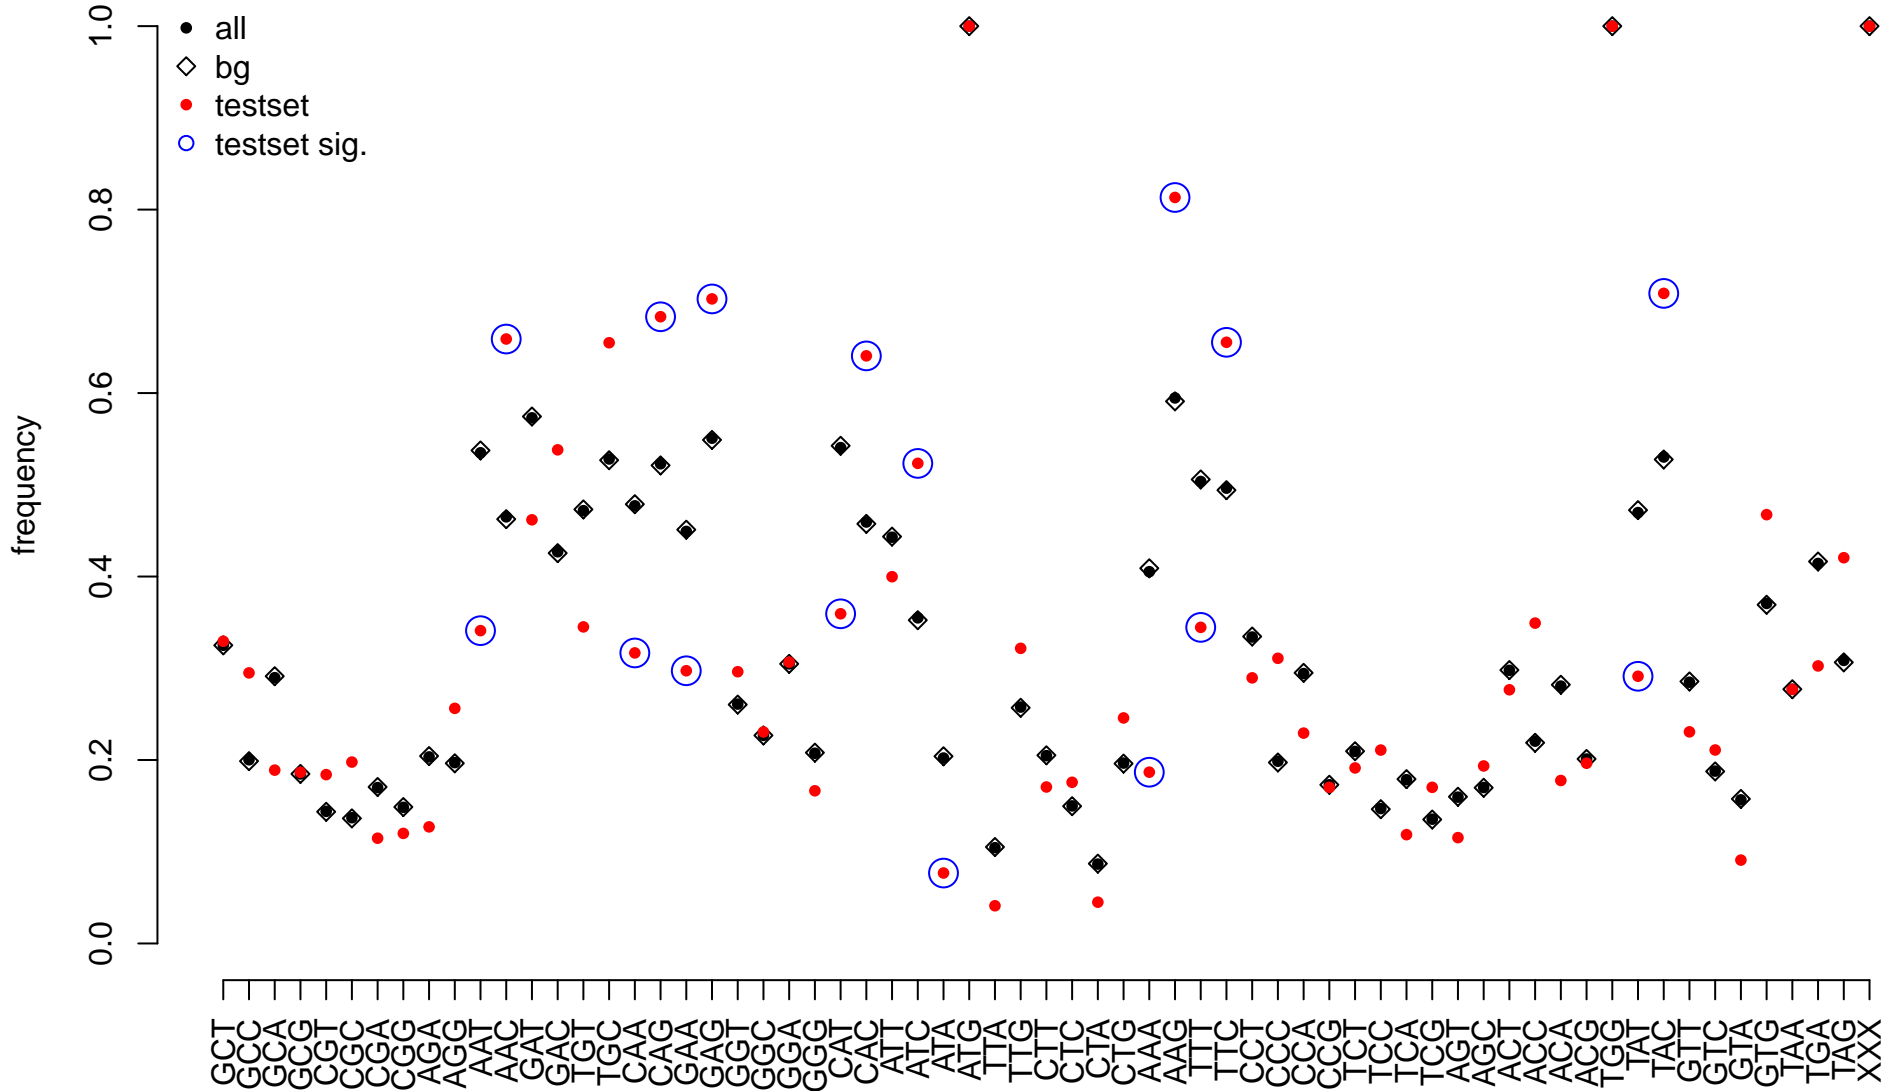

**median expression values**  
**#genes: 587**

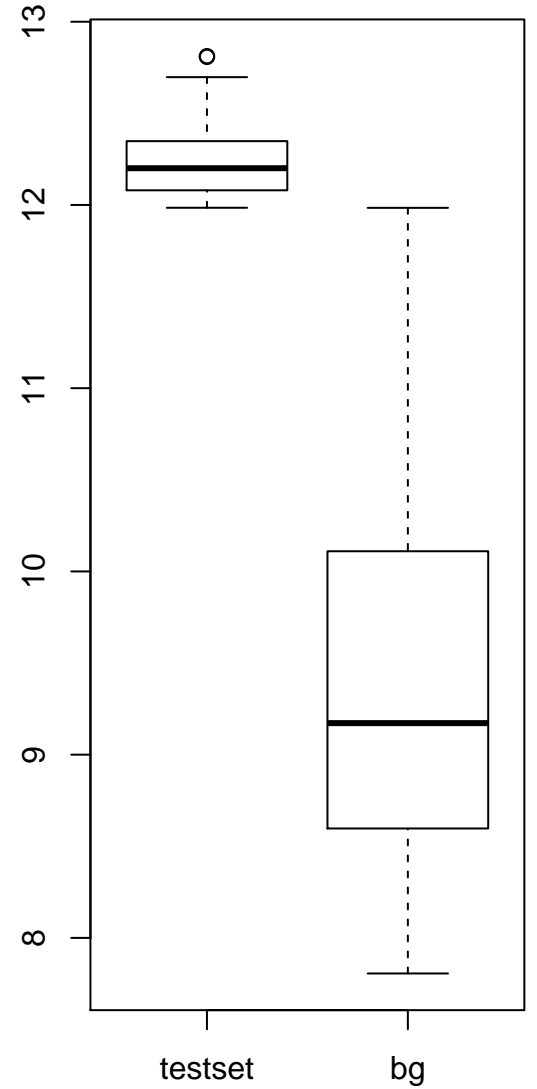

Codon usage frequency spectrum normalized per aa per gene  
group starting from highest expression values #genes: 683

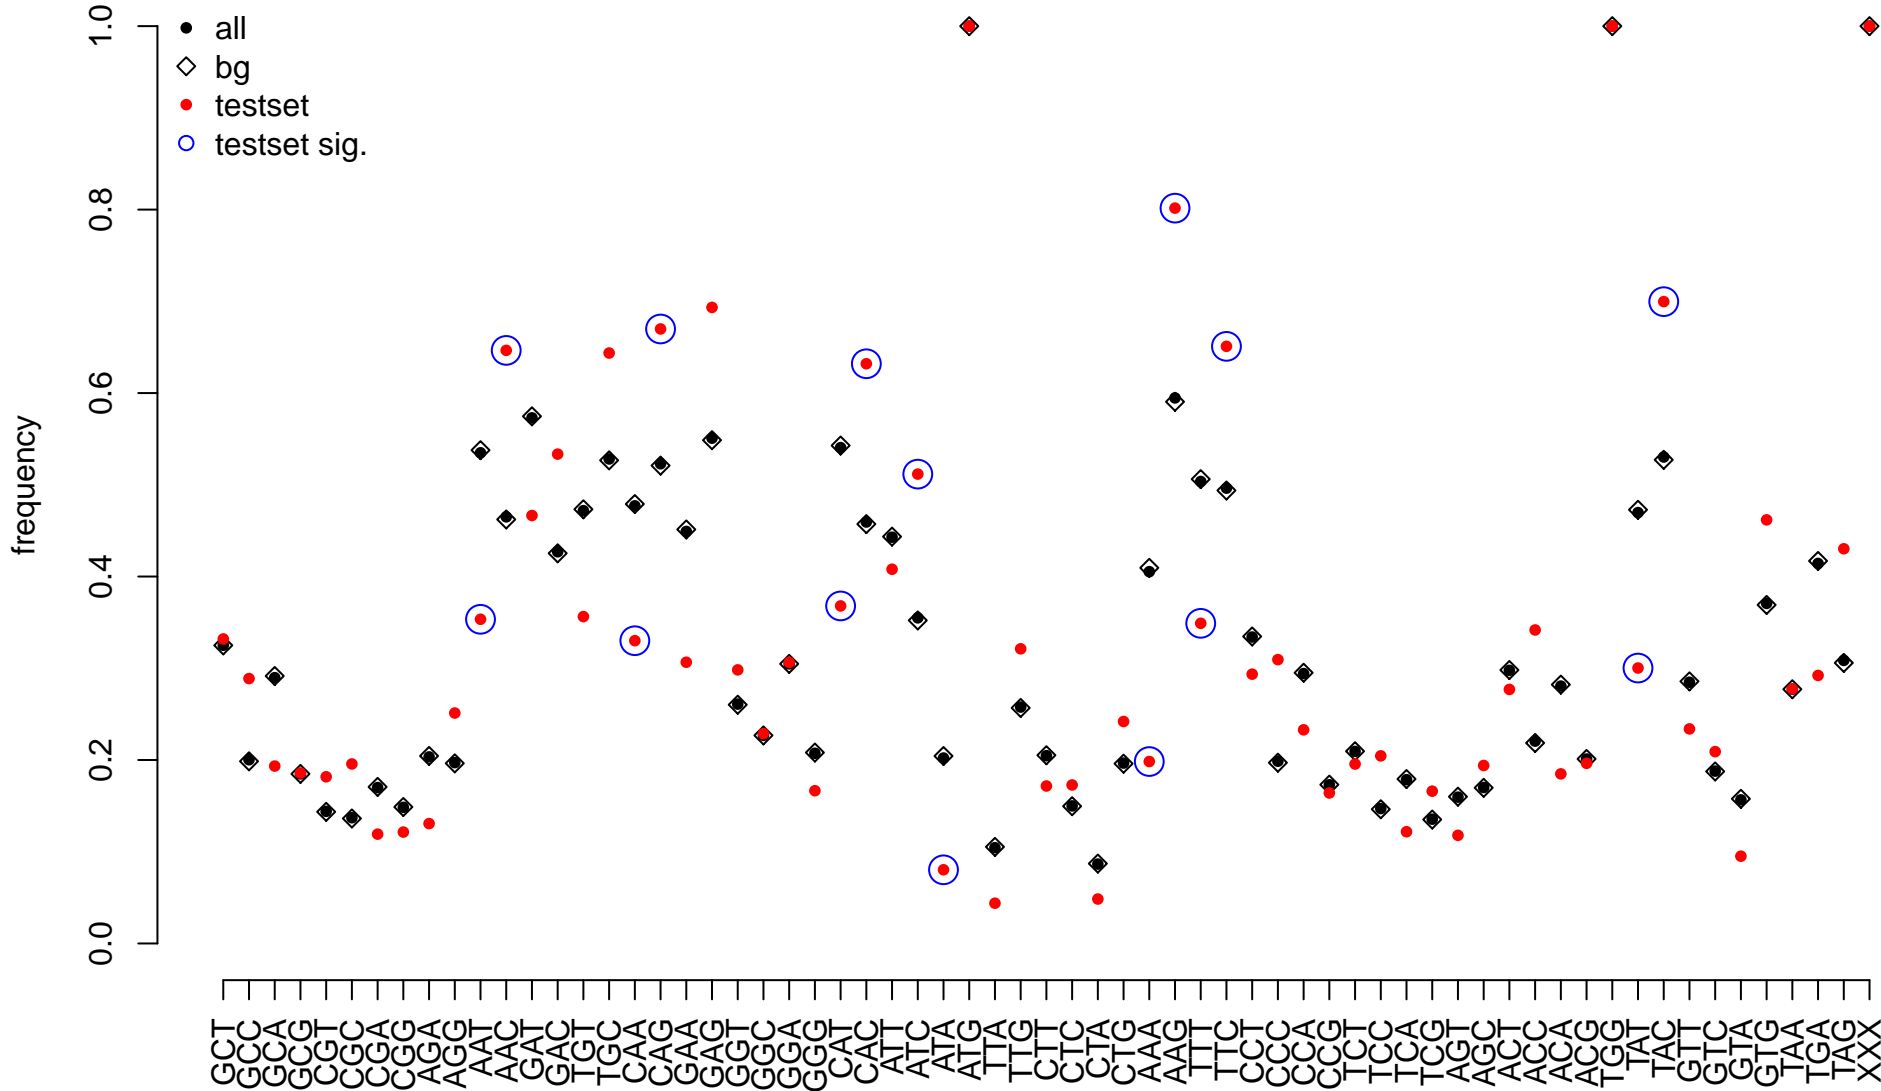

median expression values  
#genes: 683

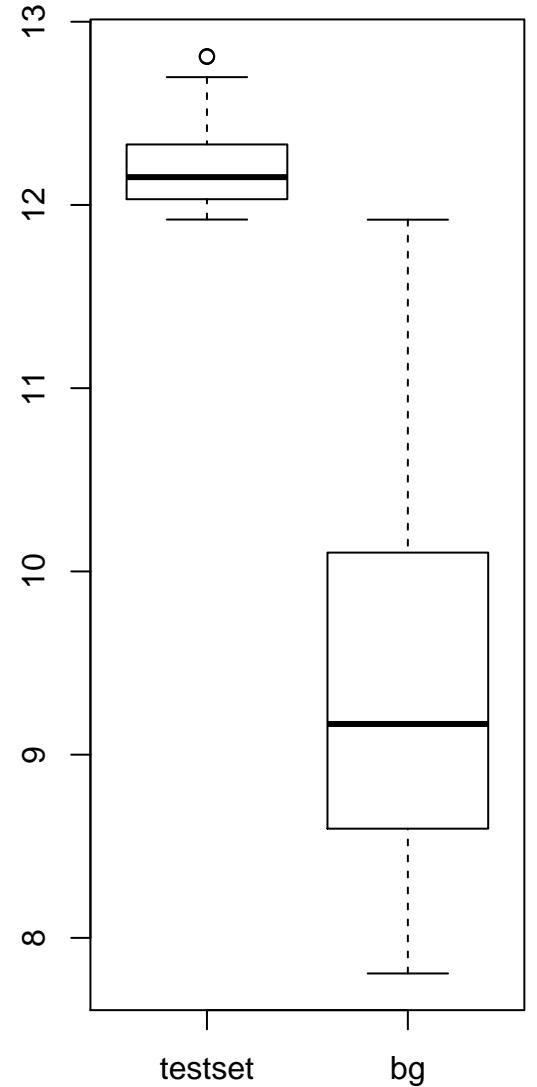





**Codon usage frequency spectrum normalized per aa per gene**  
**group starting from highest expression values #genes: 880**

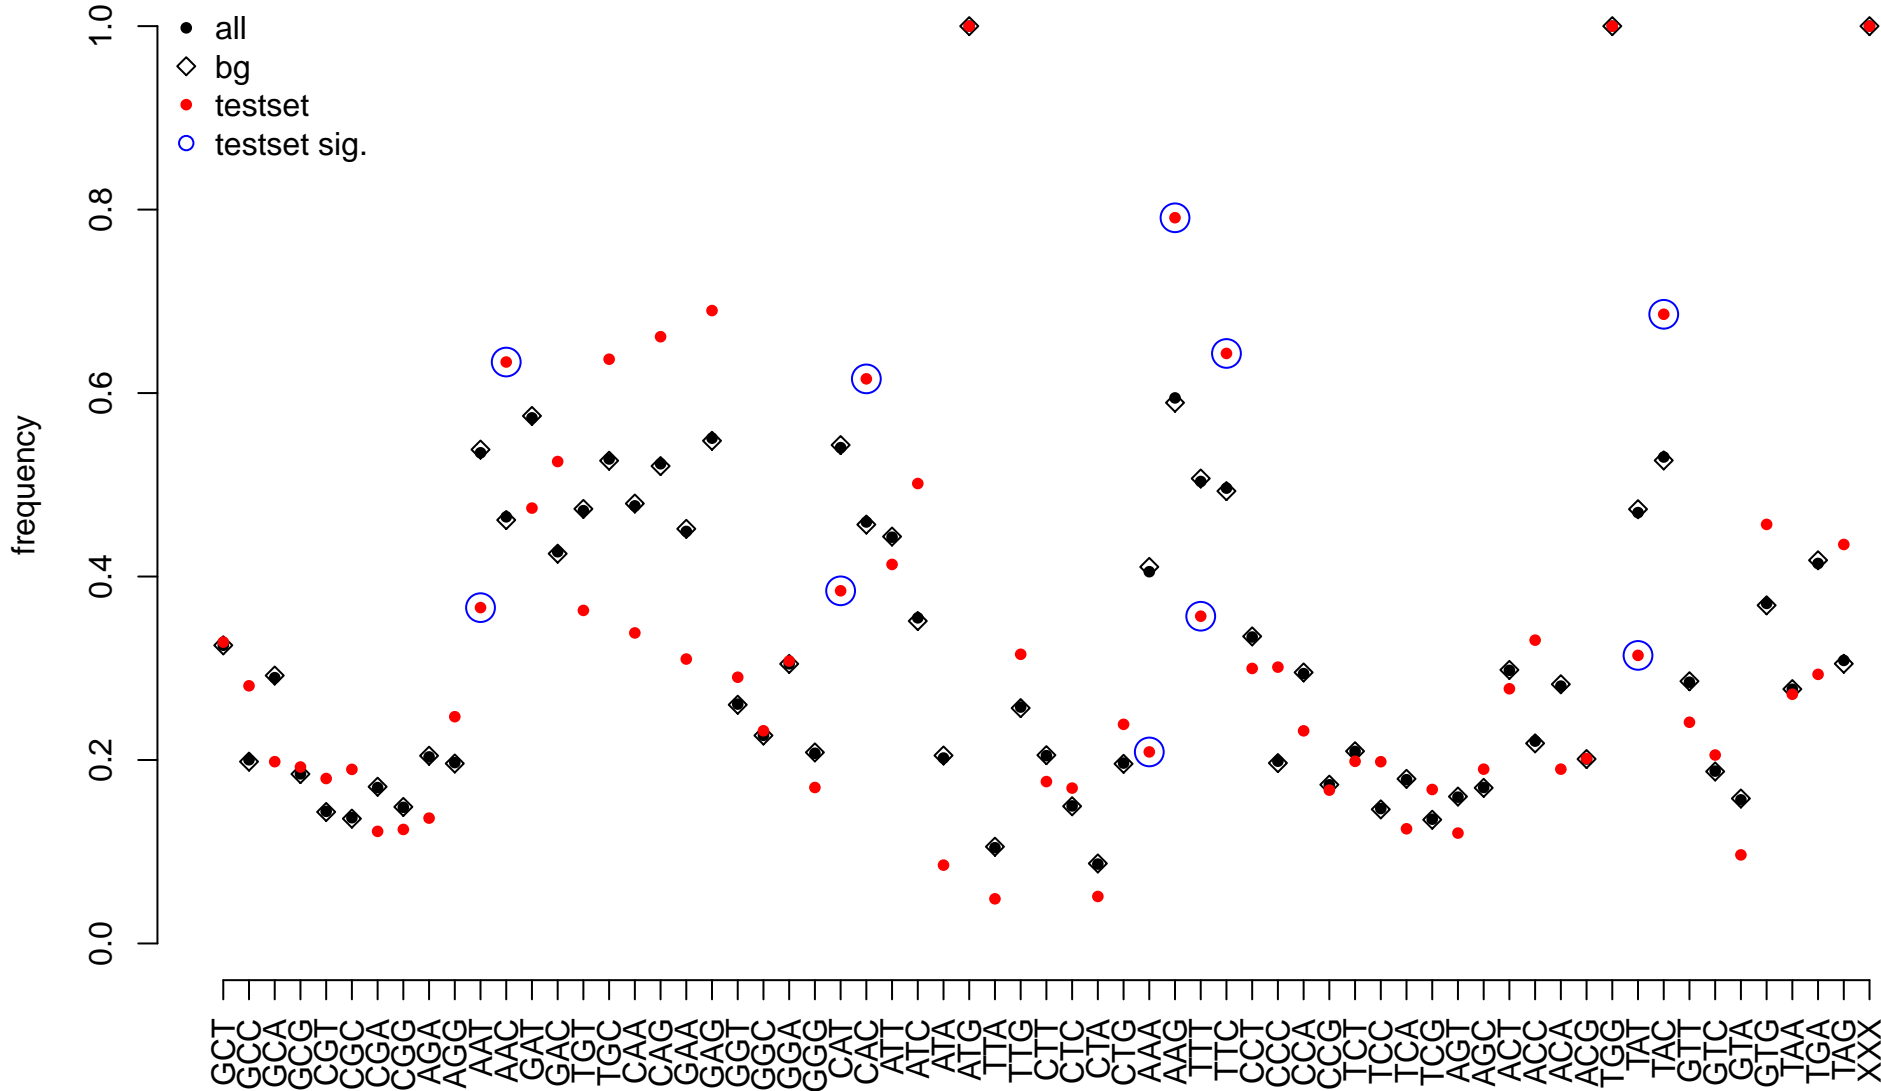

**median expression values**  
**#genes: 880**

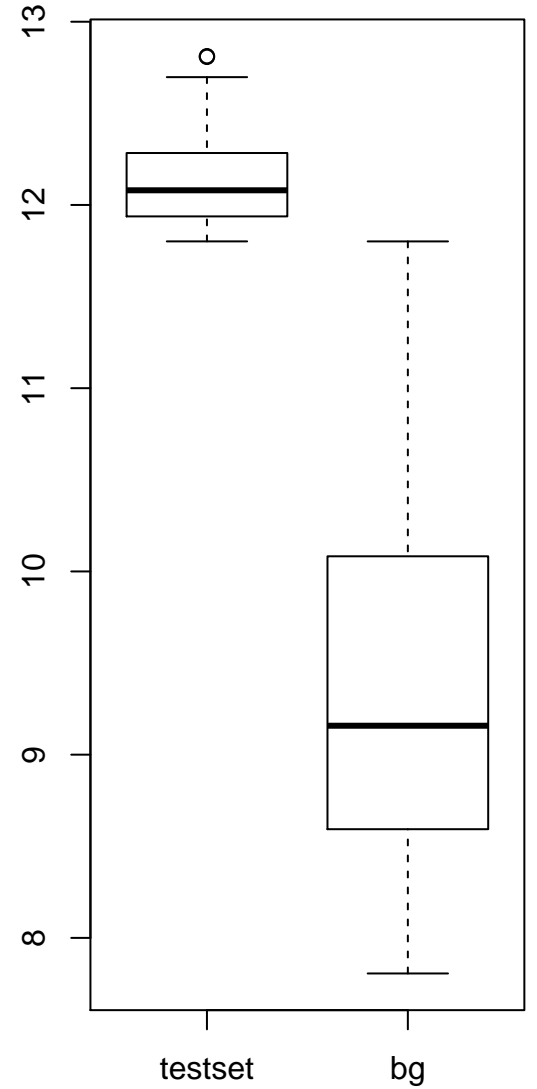

**Codon usage frequency spectrum normalized per aa per gene**  
**group starting from highest expression values #genes: 980**

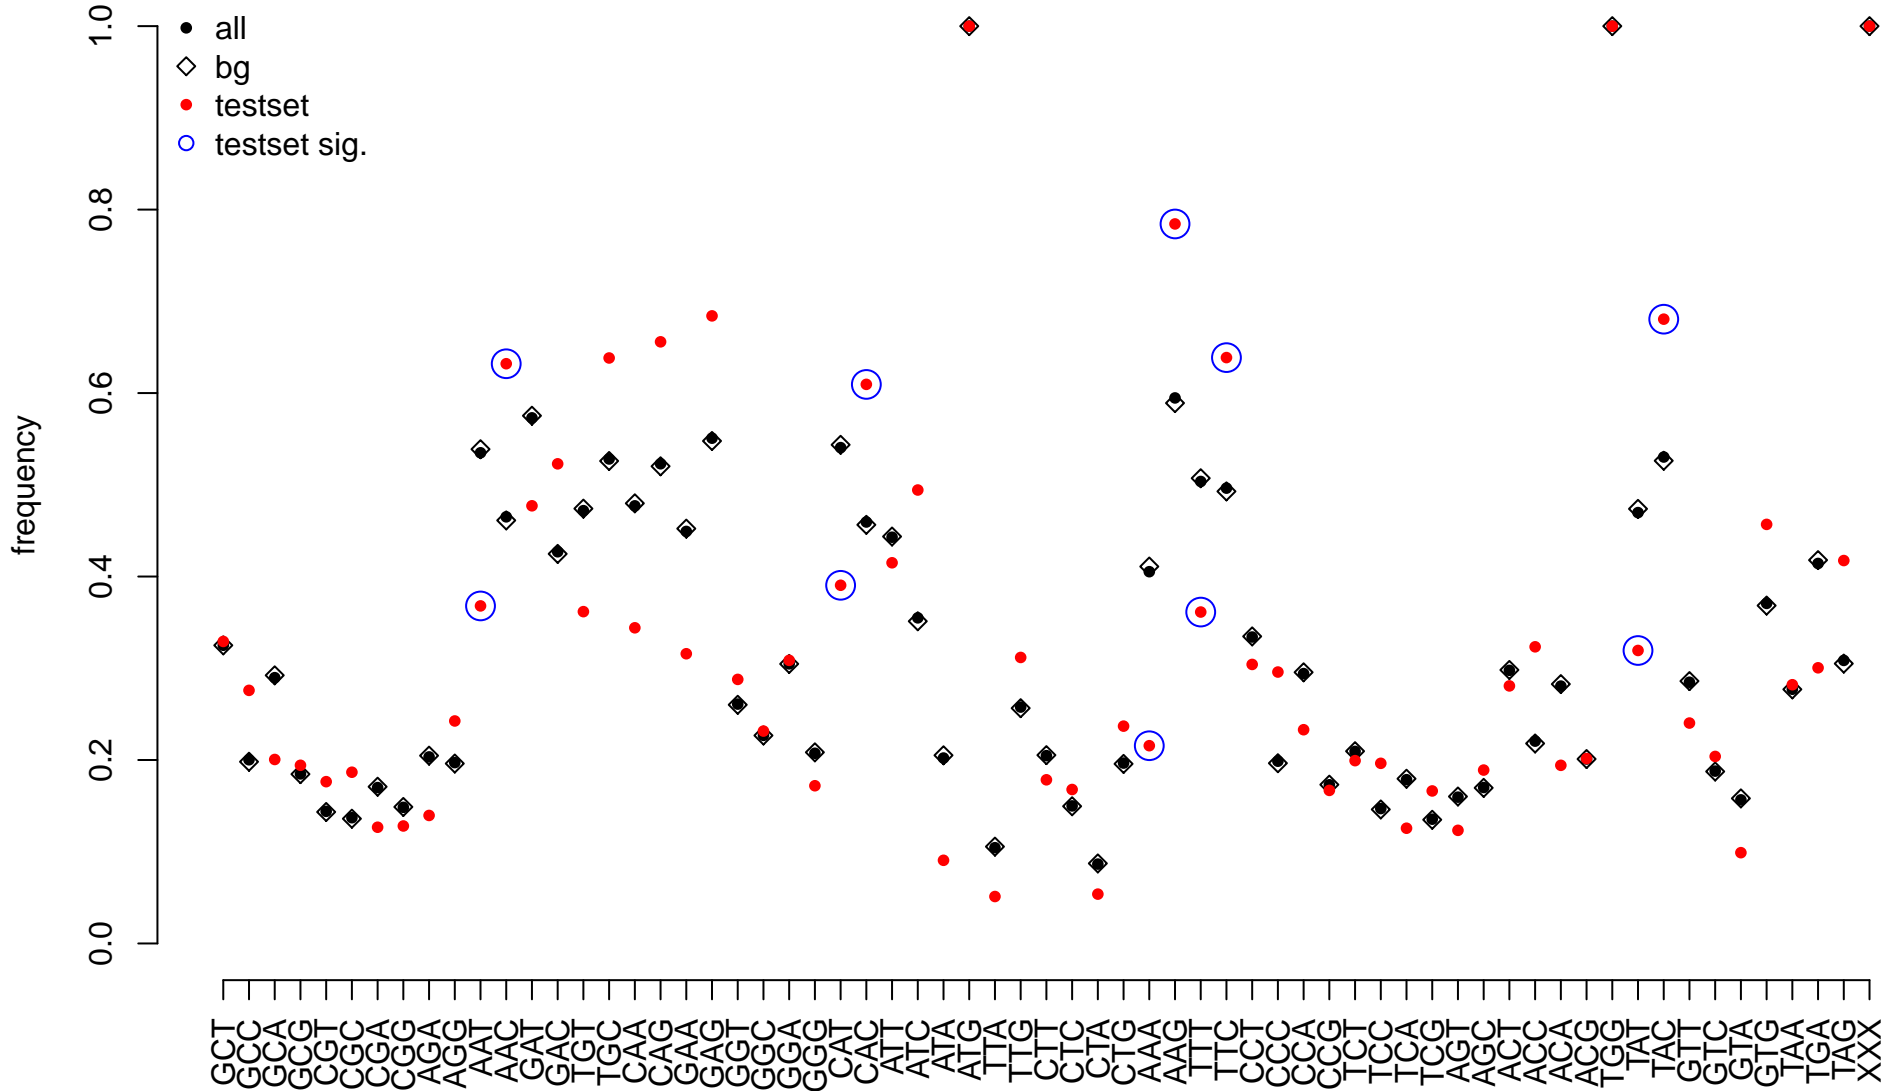

**median expression values**  
**#genes: 980**

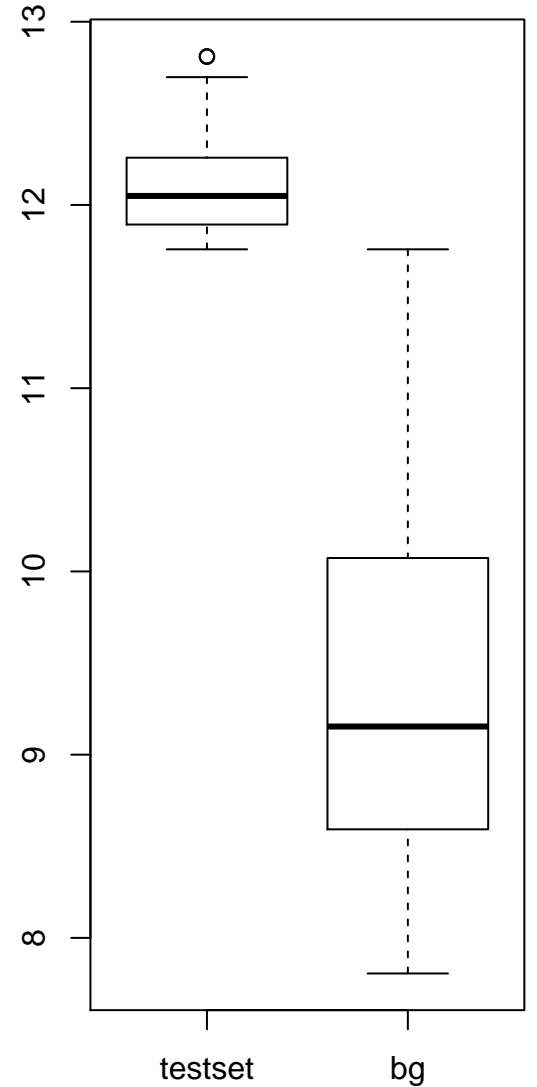

Codon usage frequency spectrum normalized per aa per gene  
group starting from highest expression values #genes: 1080

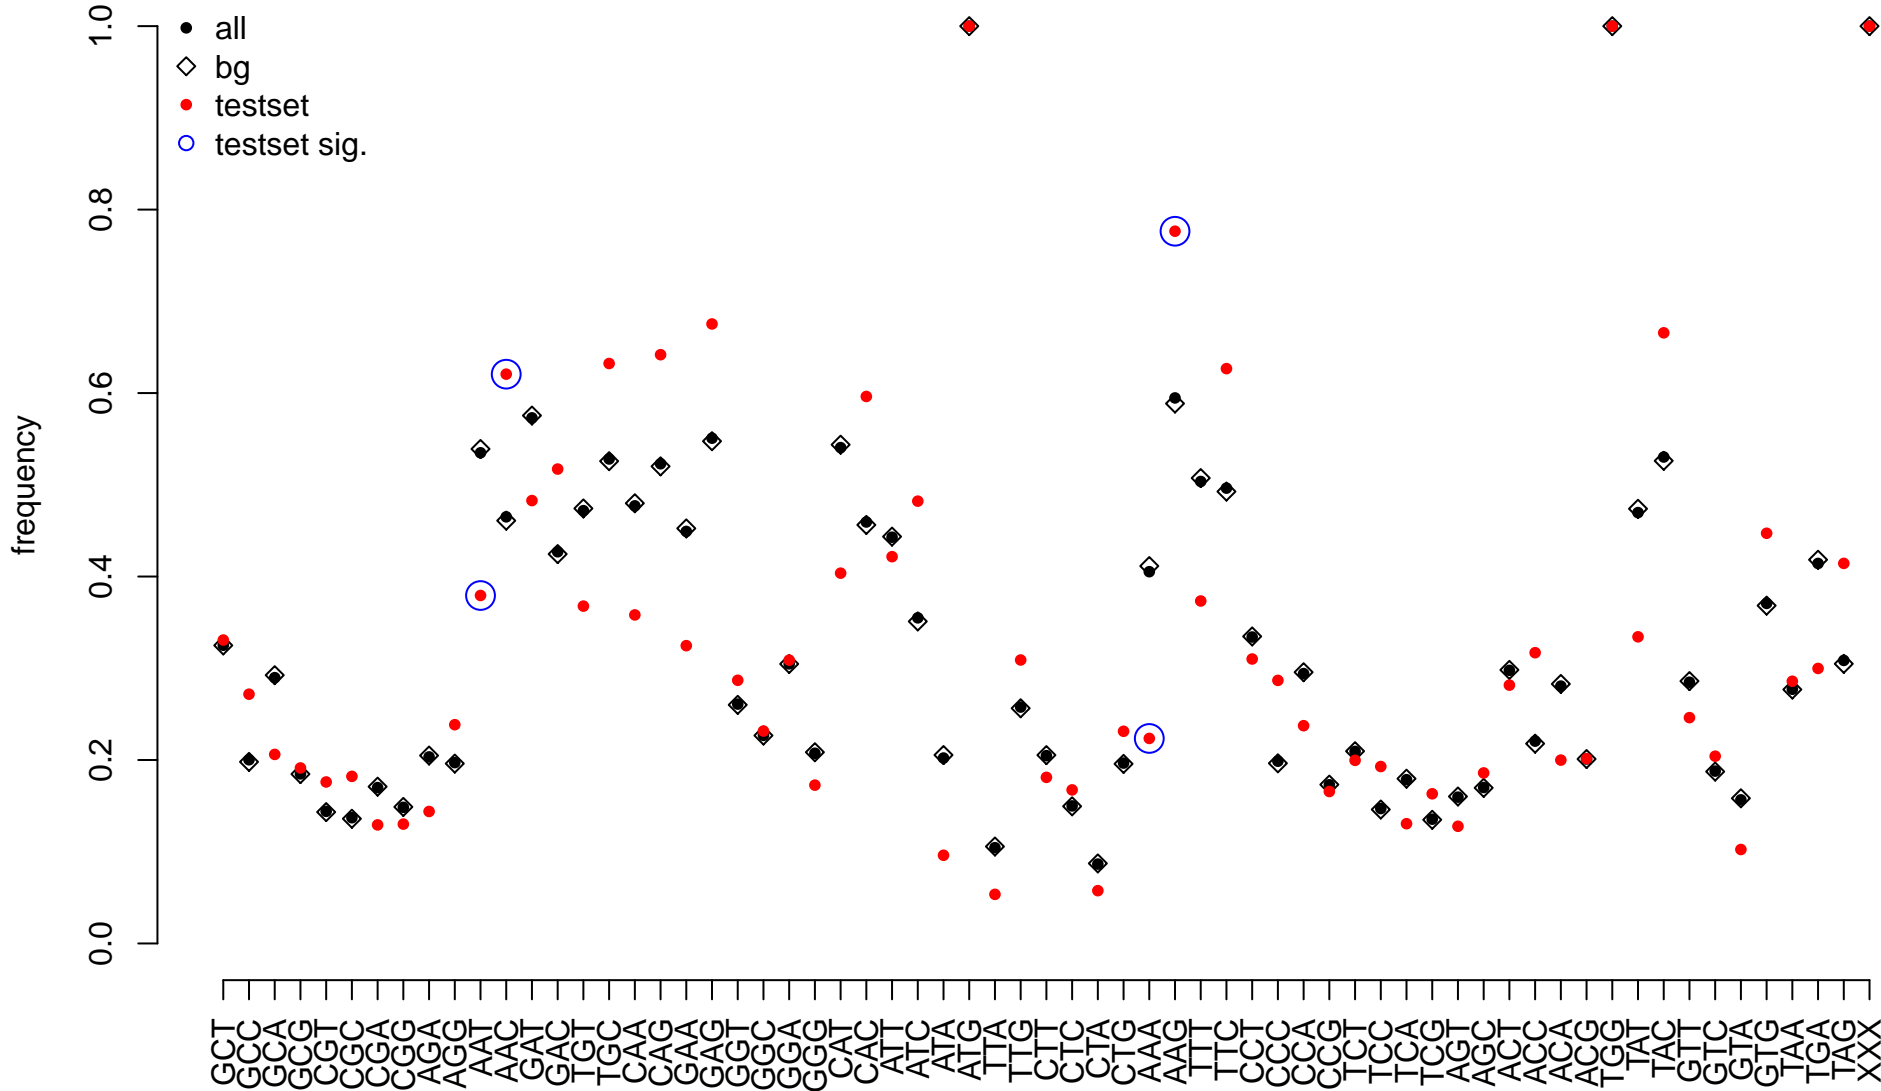

median expression values  
#genes: 1080

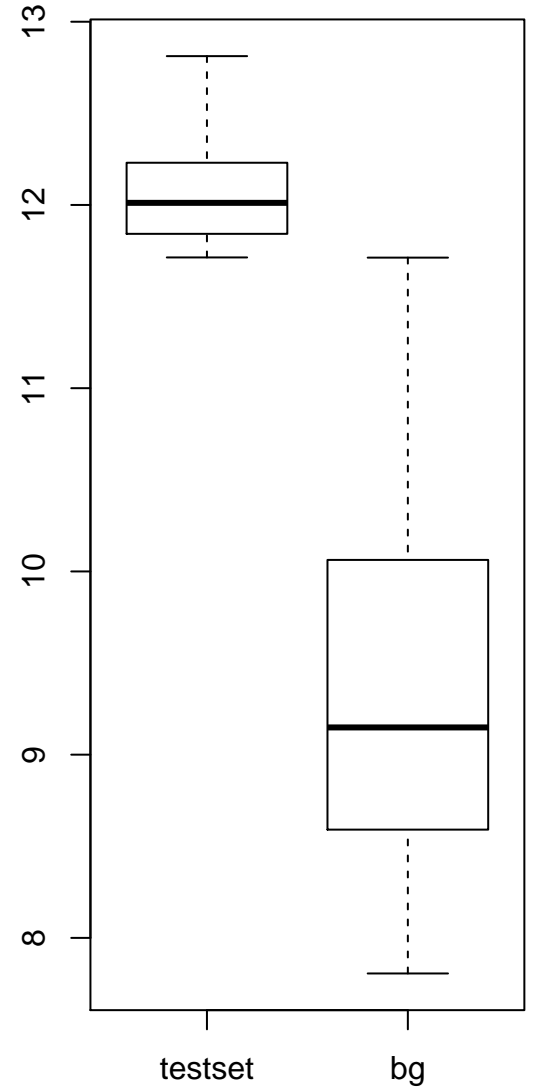

Codon usage frequency spectrum normalized per aa per gene  
group starting from highest expression values #genes: 1179

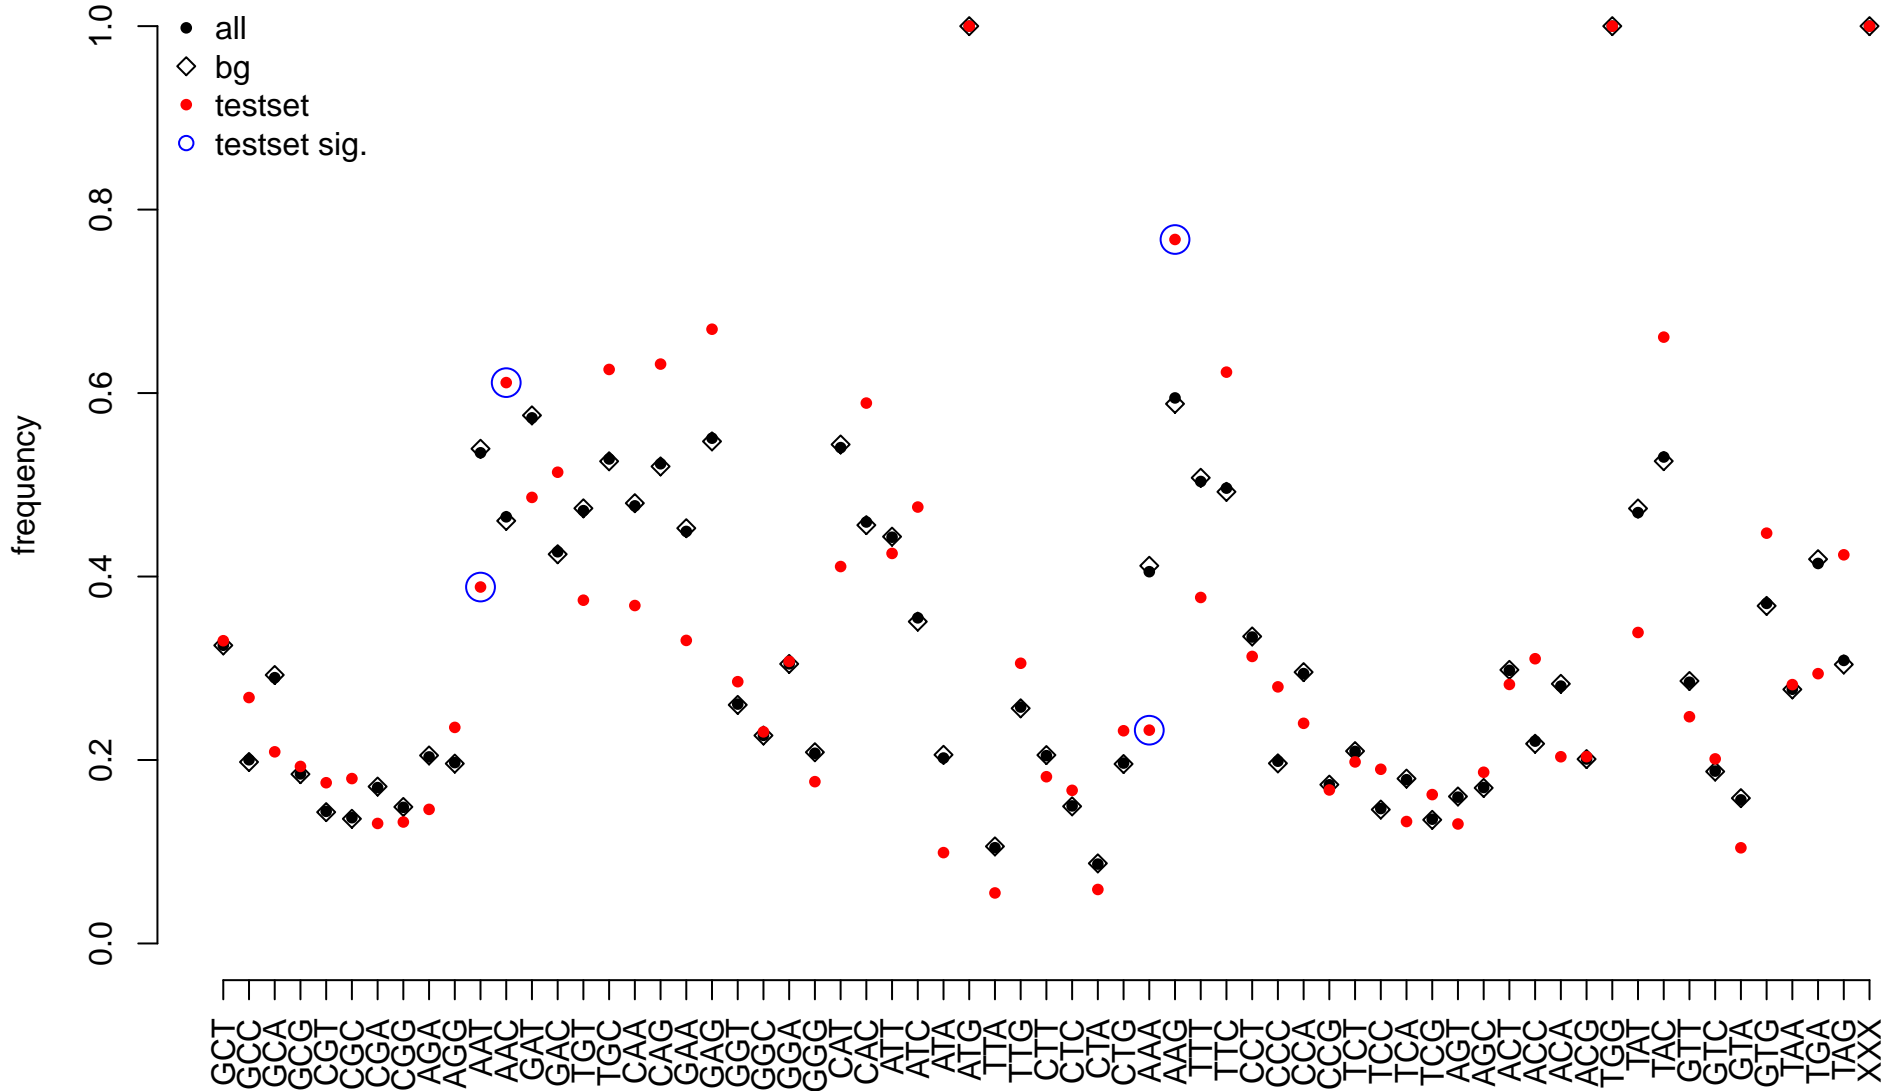

median expression values  
#genes: 1179

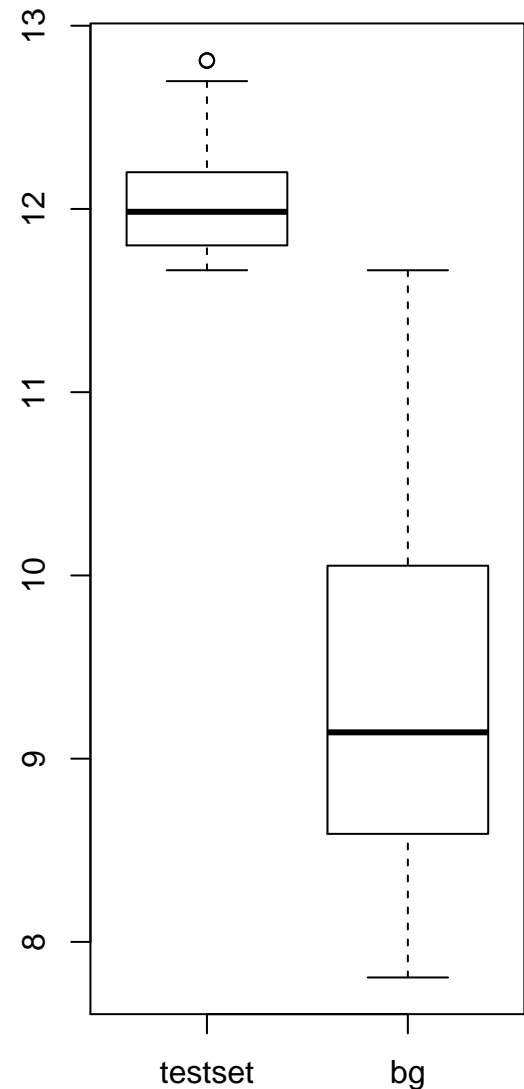

Codon usage frequency spectrum normalized per aa per gene  
group starting from highest expression values #genes: 1279

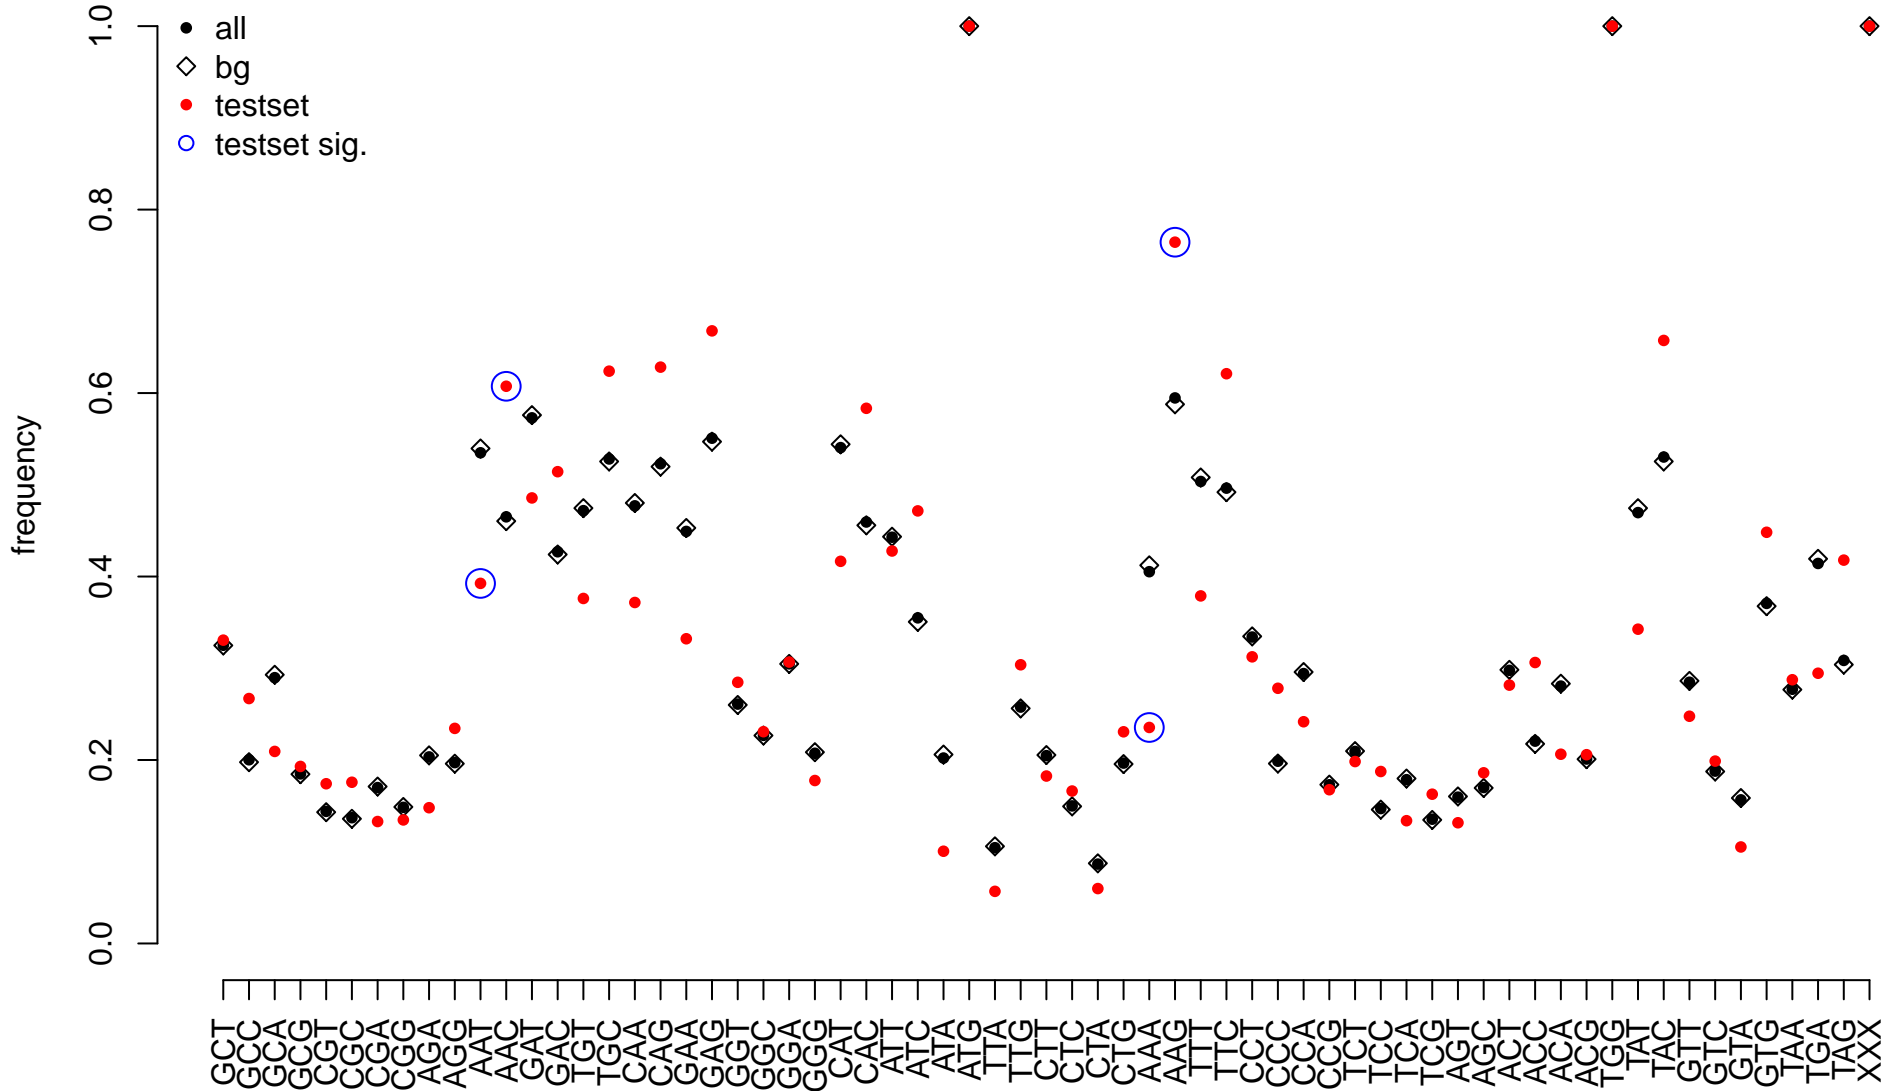

median expression values  
#genes: 1279

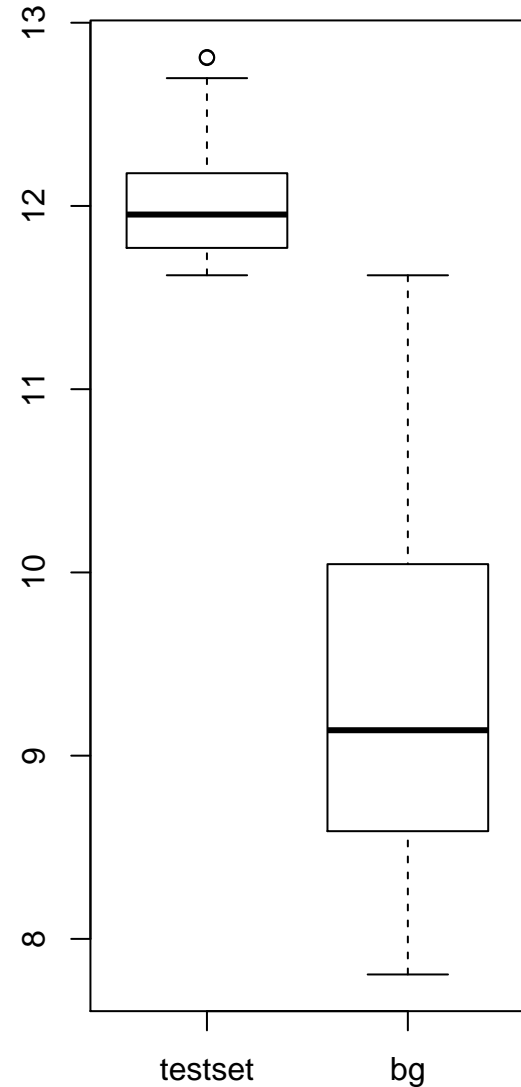

Codon usage frequency spectrum normalized per aa per gene  
group starting from highest expression values #genes: 1378

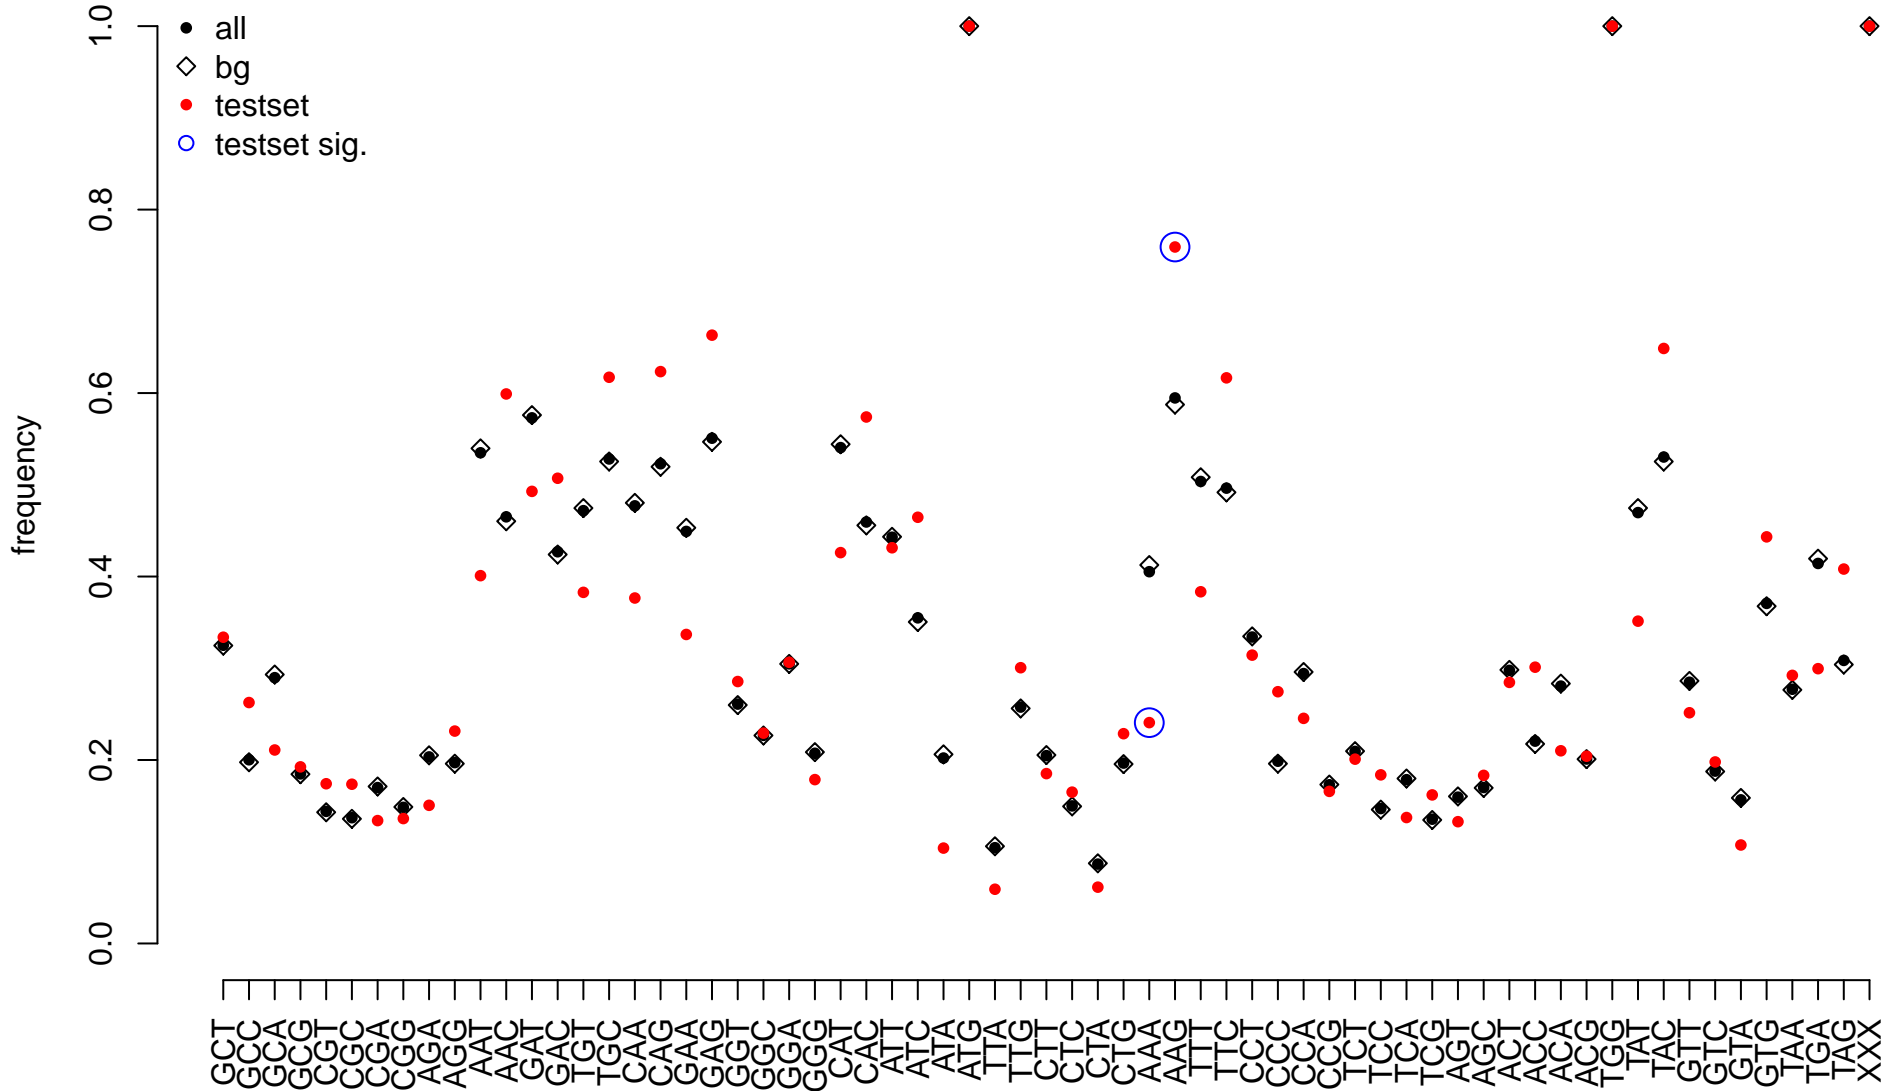

median expression values  
#genes: 1378

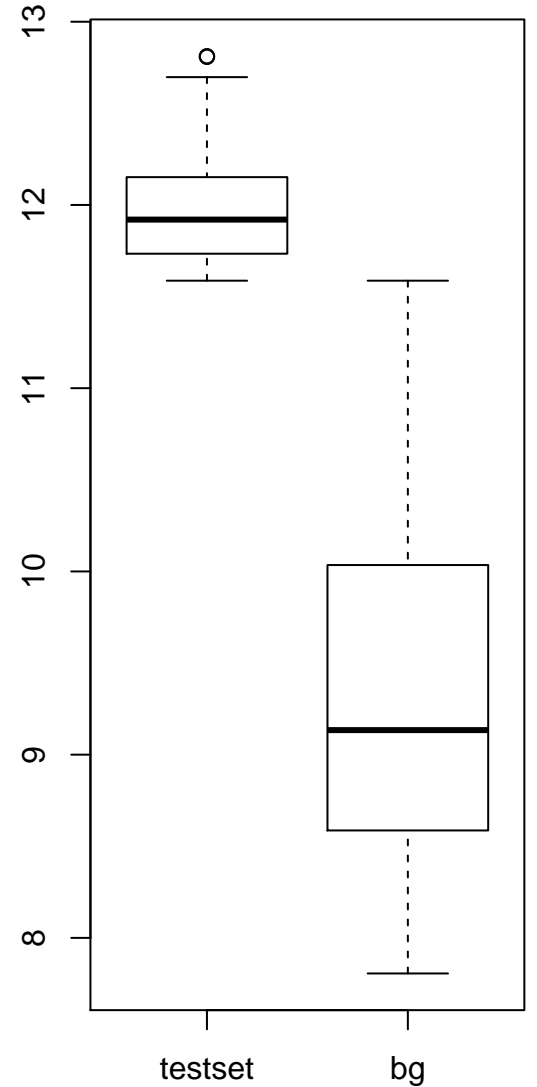

Codon usage frequency spectrum normalized per aa per gene  
group starting from highest expression values #genes: 1477

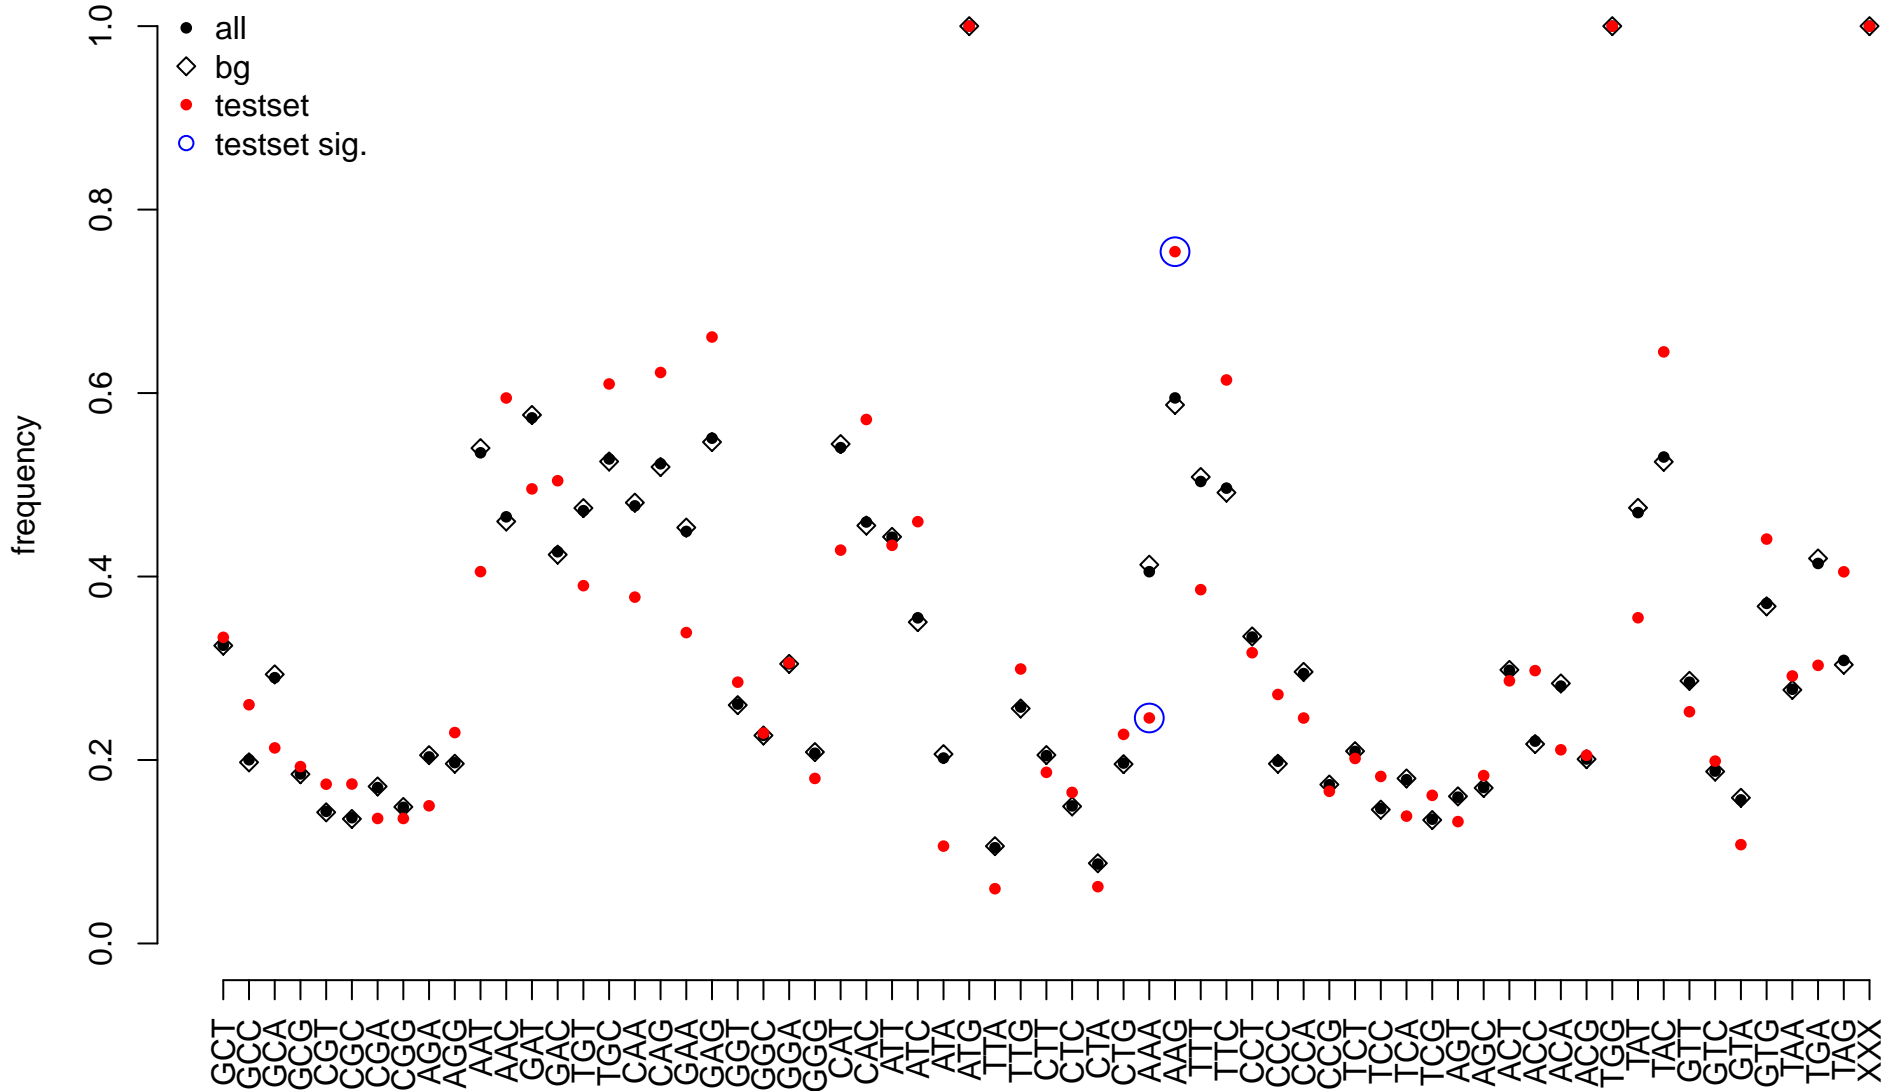

median expression values  
#genes: 1477

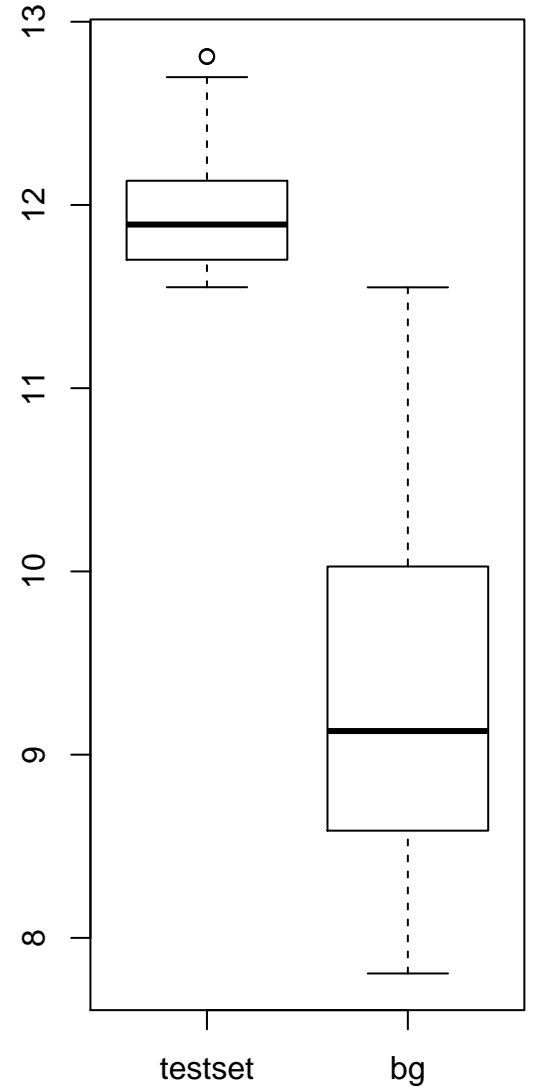



Codon usage frequency spectrum normalized per aa per gene  
group starting from highest expression values #genes: 1576

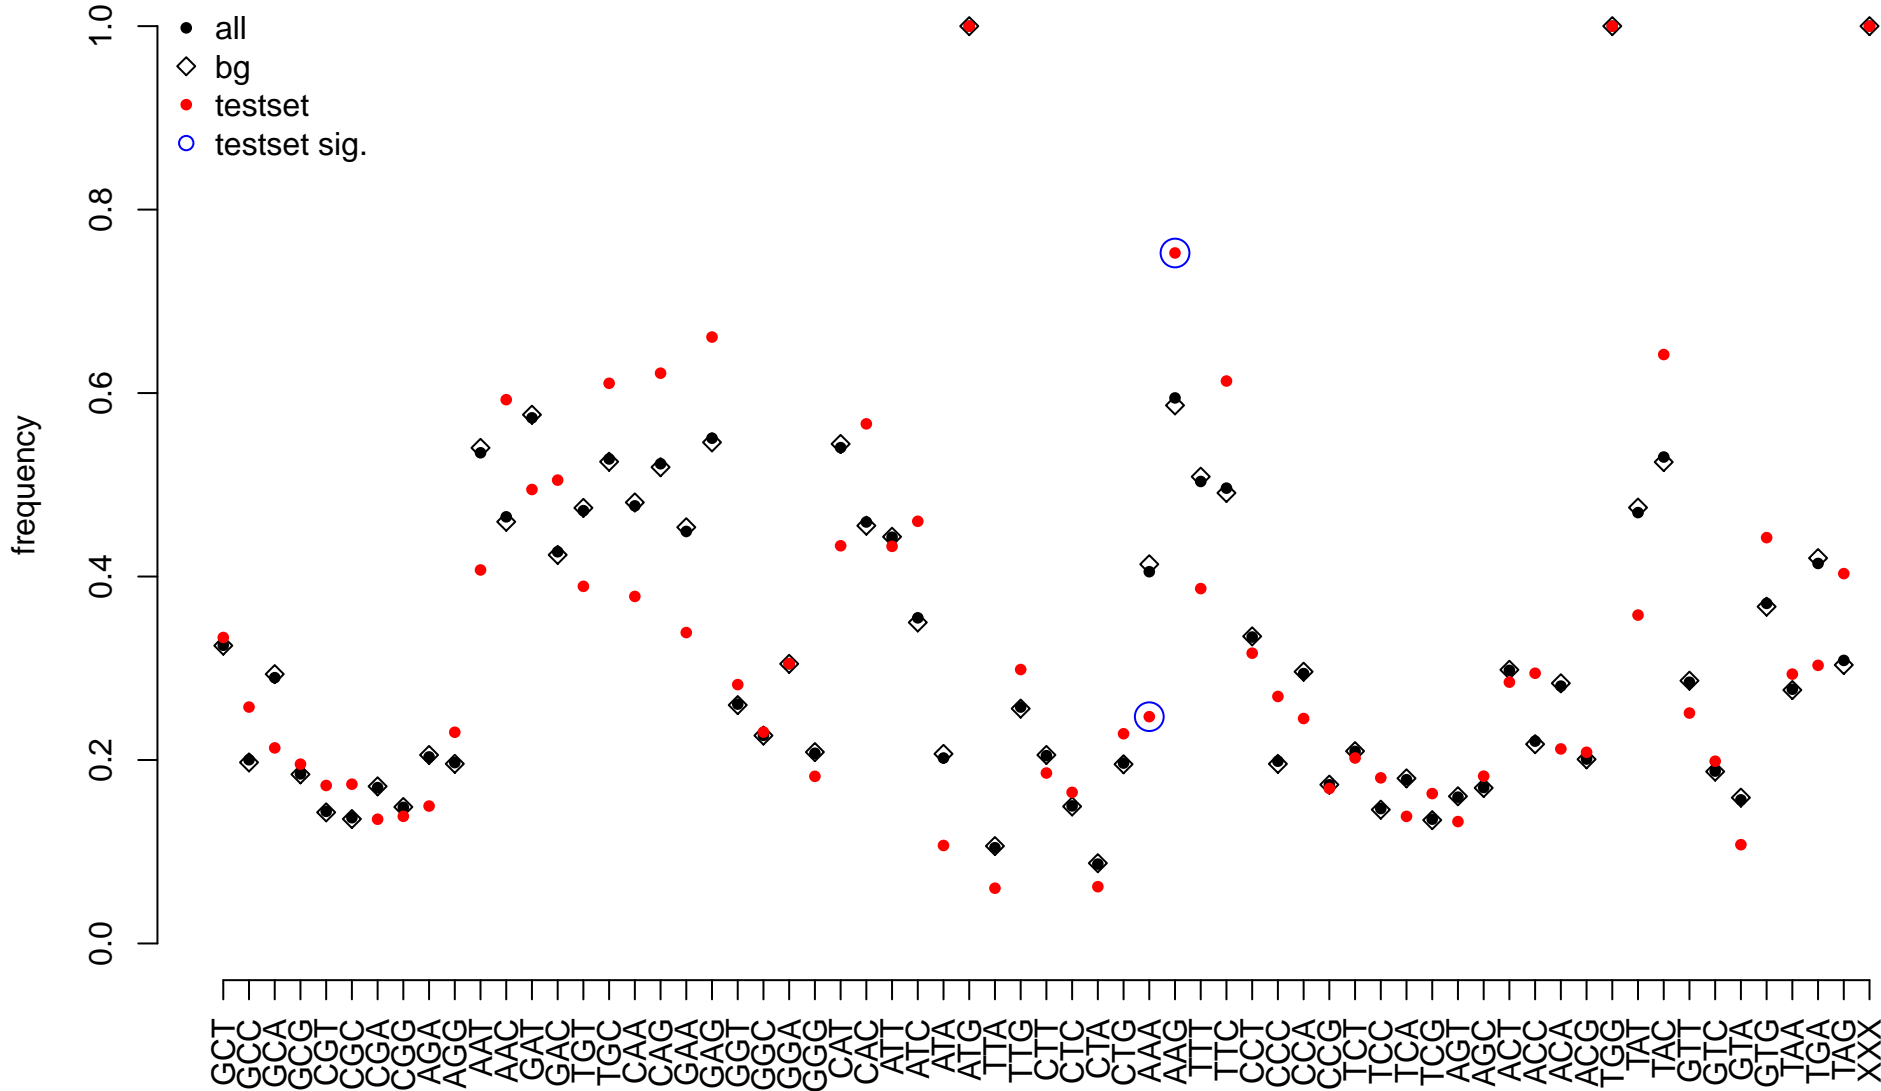

median expression values  
#genes: 1576

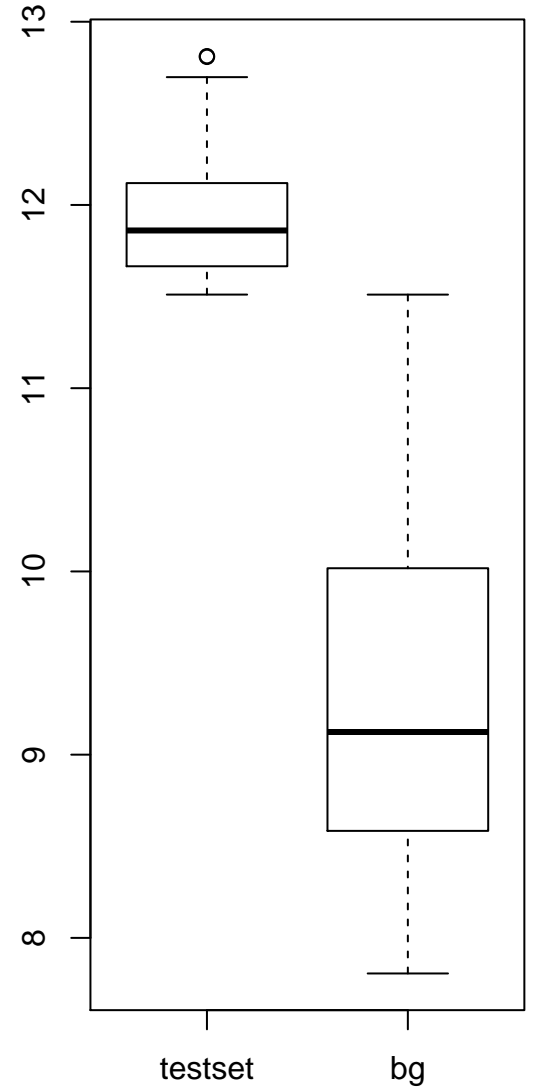

**Codon usage frequency spectrum normalized per aa per gene  
group starting from highest expression values #genes: 1672**

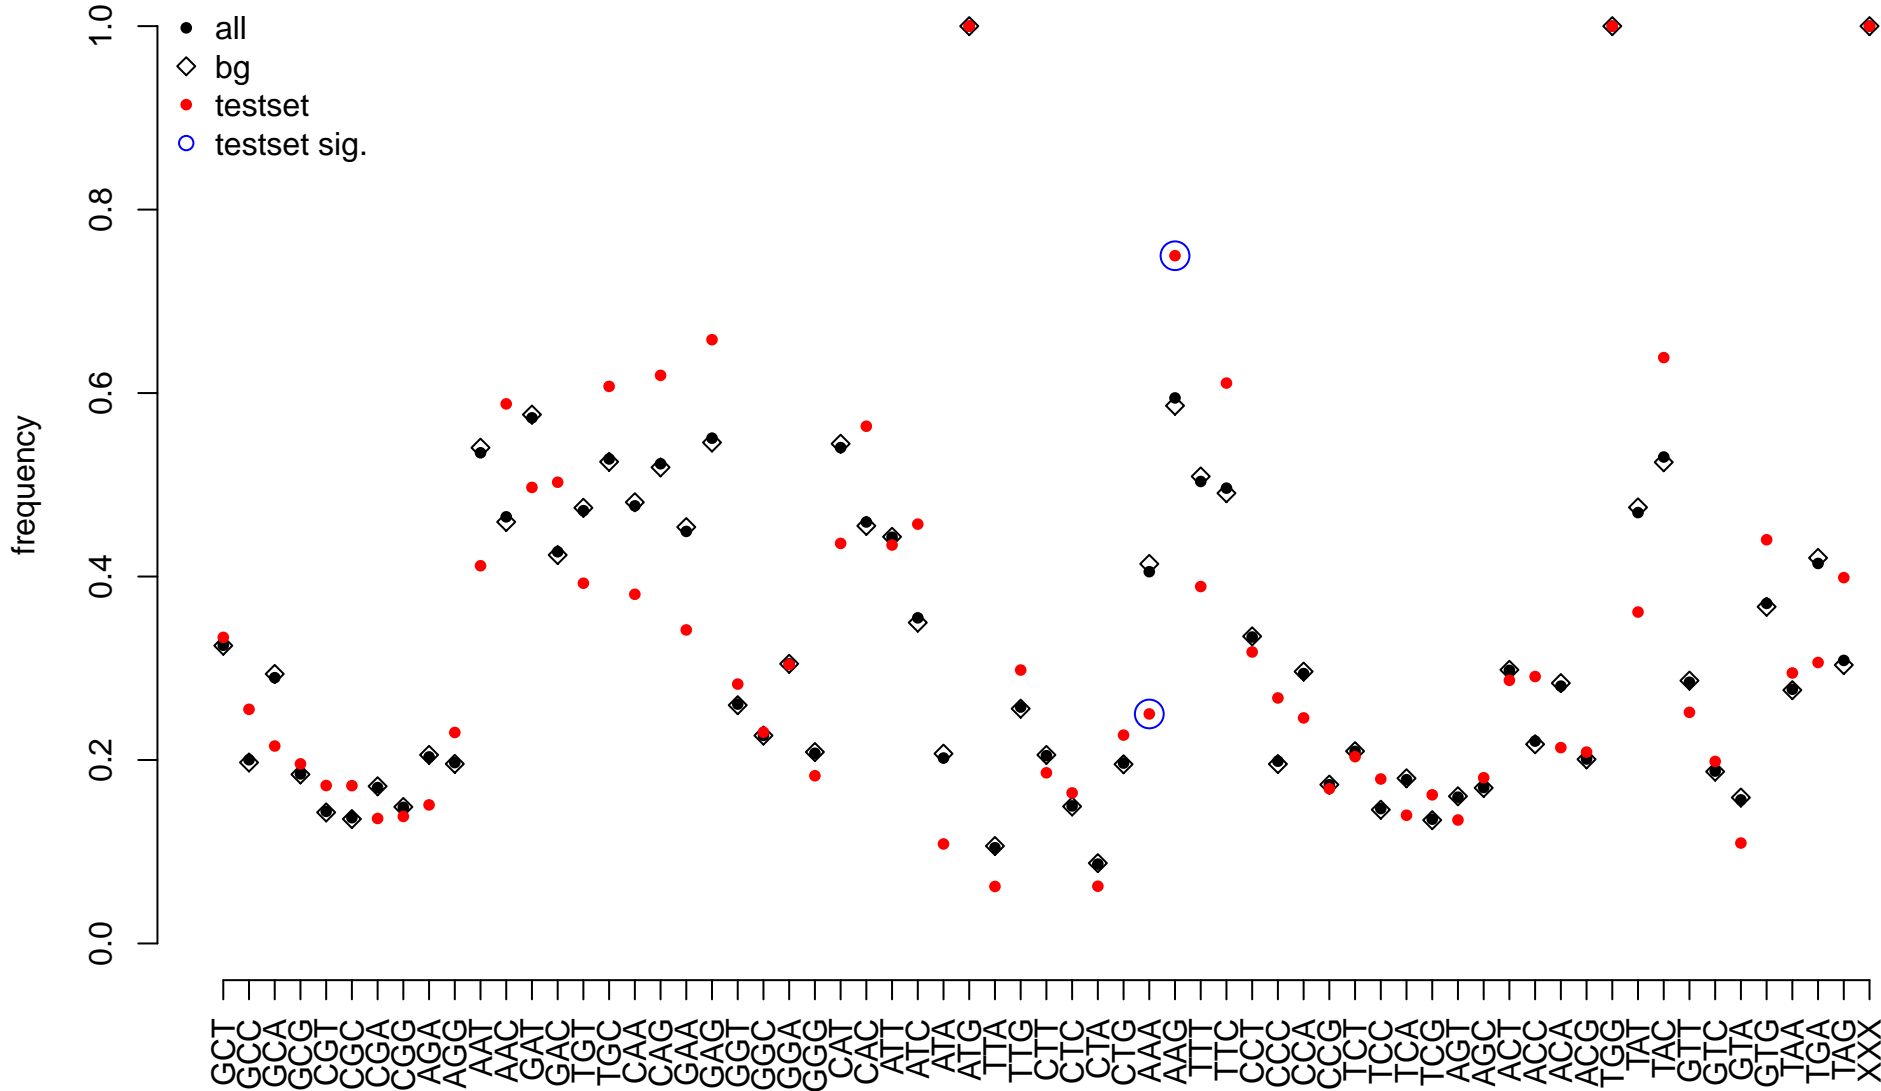

**median expression values  
#genes: 1672**

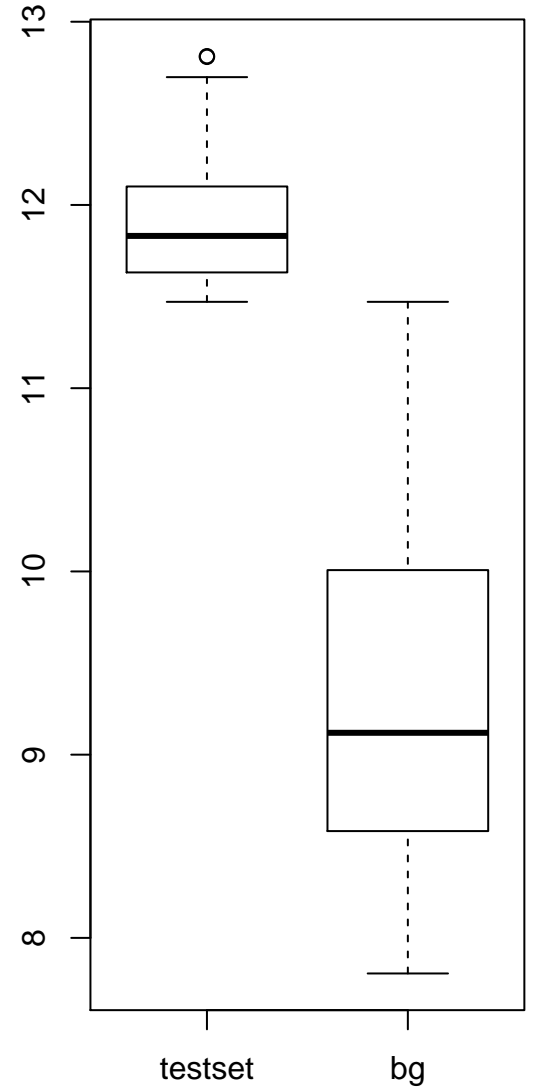

Codon usage frequency spectrum normalized per aa per gene  
group starting from highest expression values #genes: 1771

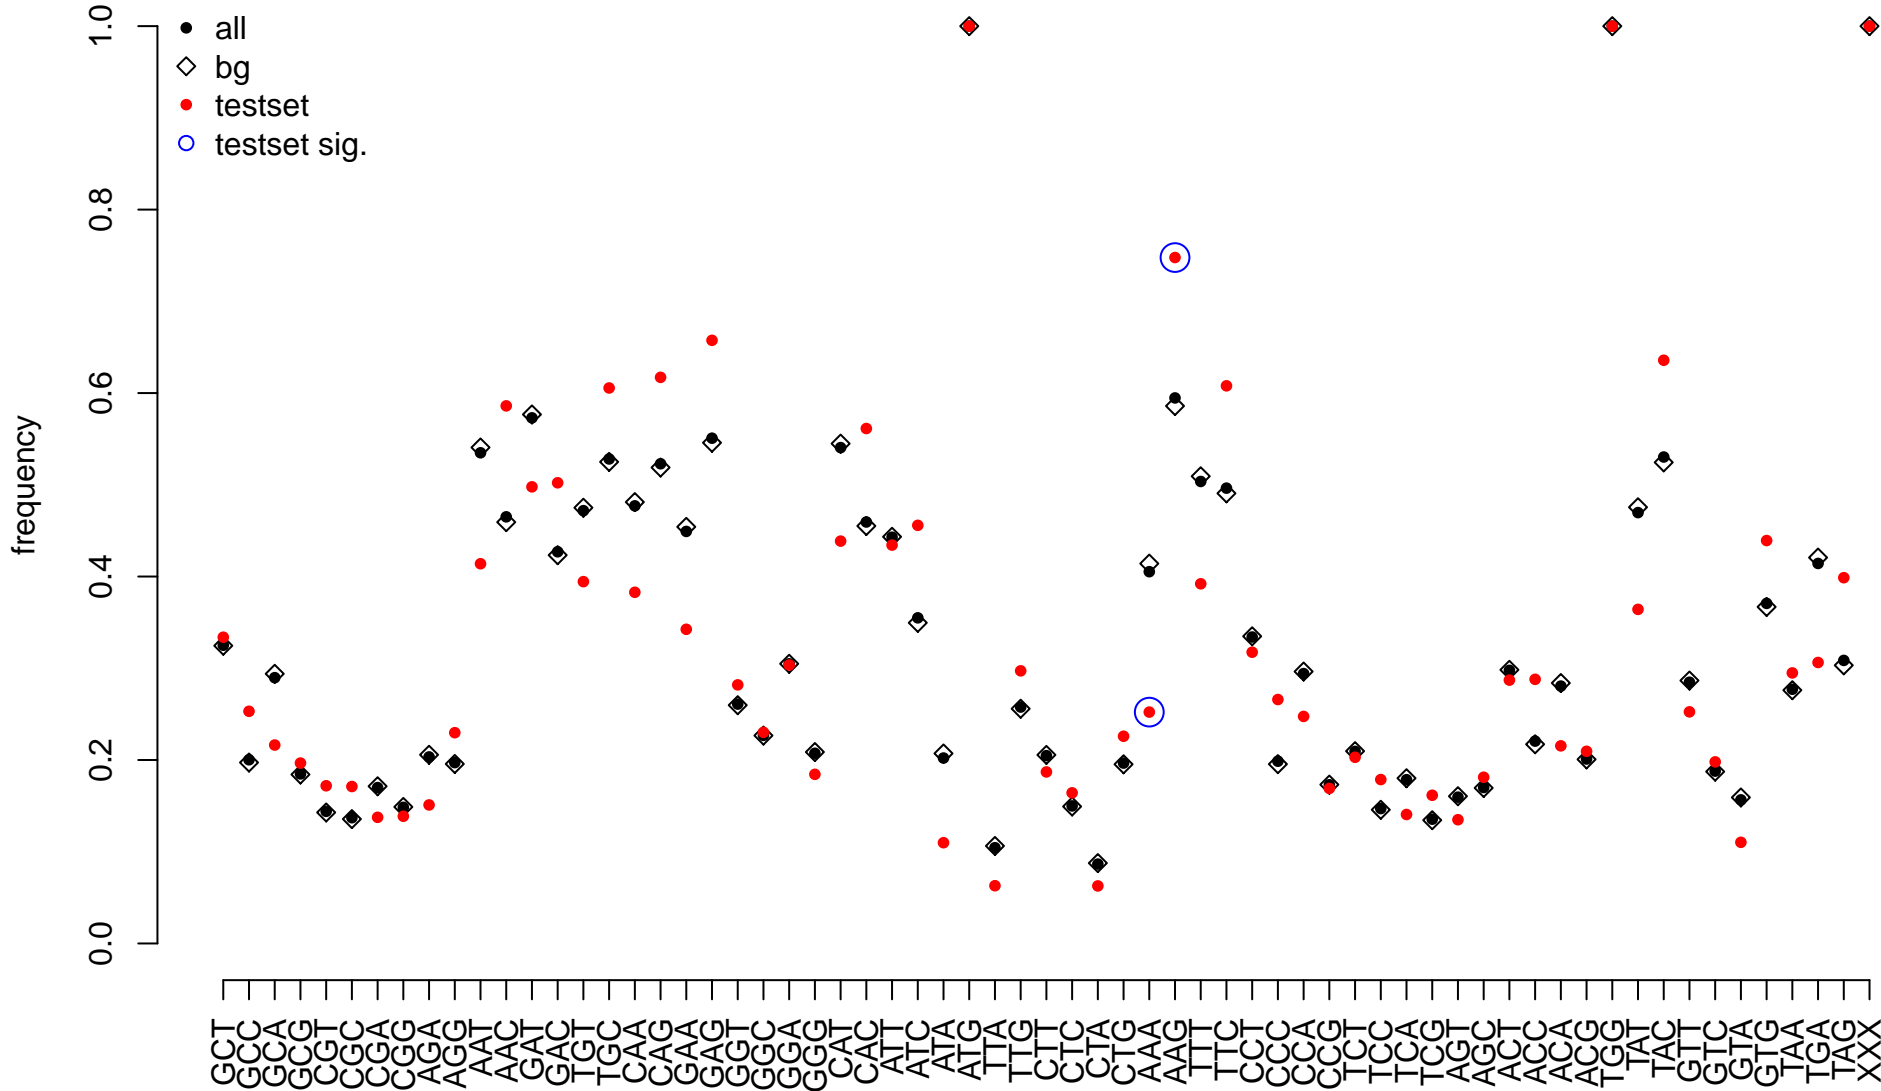

median expression values  
#genes: 1771

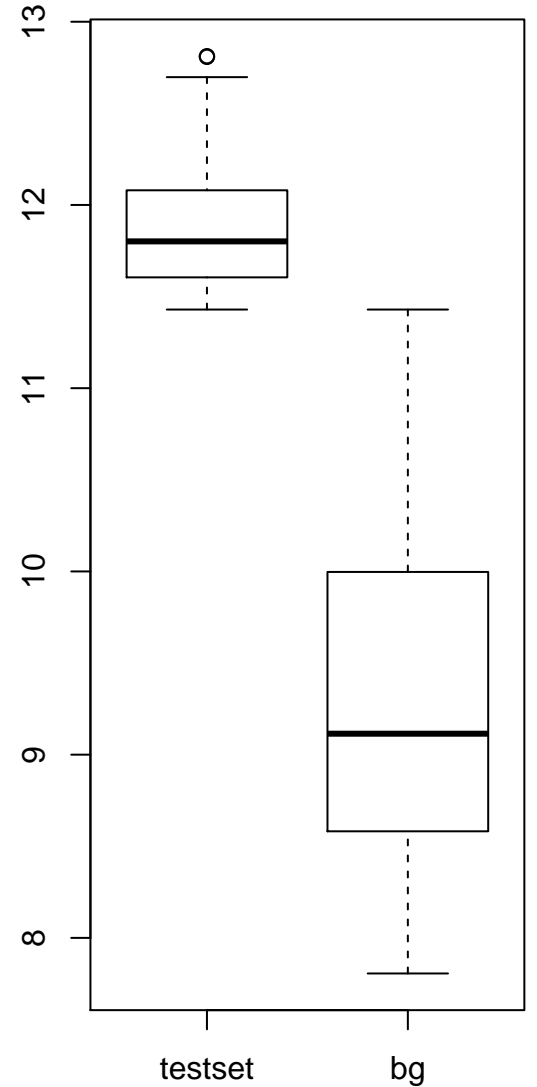

Codon usage frequency spectrum normalized per aa per gene  
group starting from highest expression values #genes: 1869

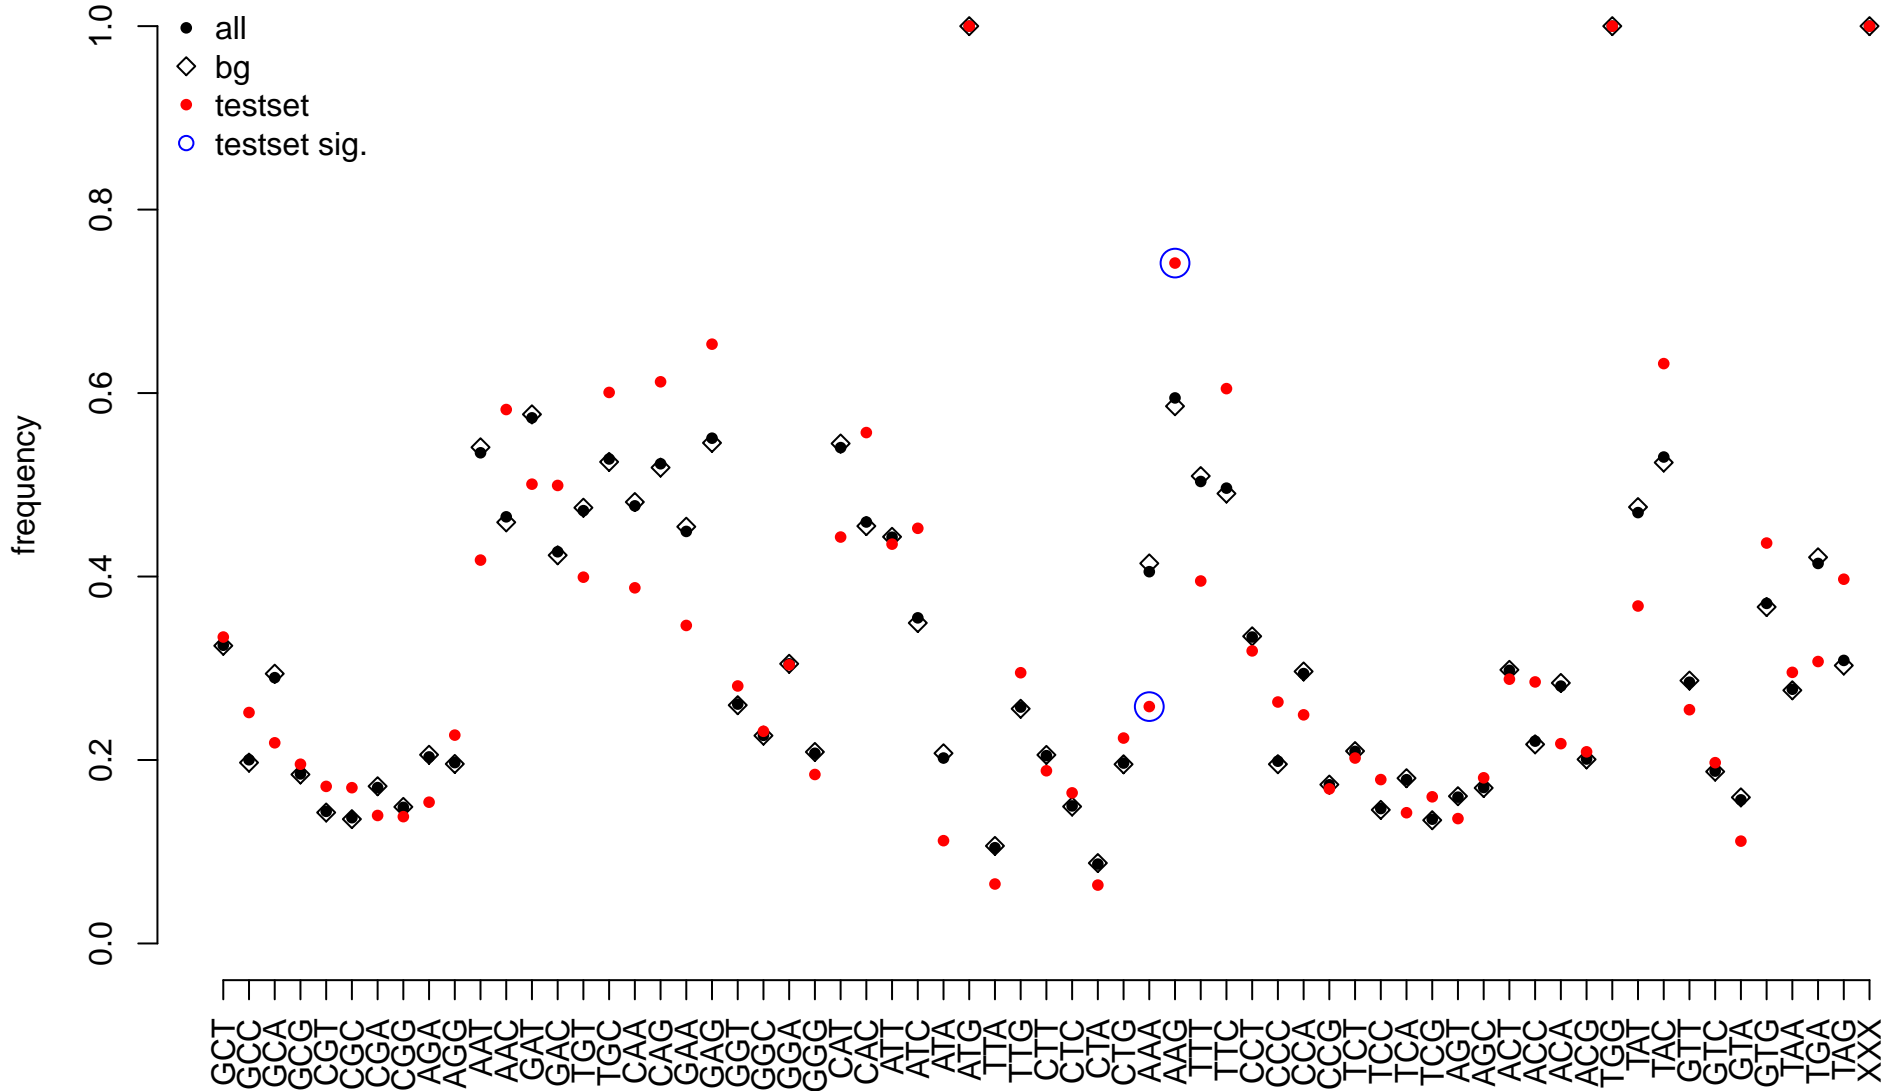

median expression values  
#genes: 1869

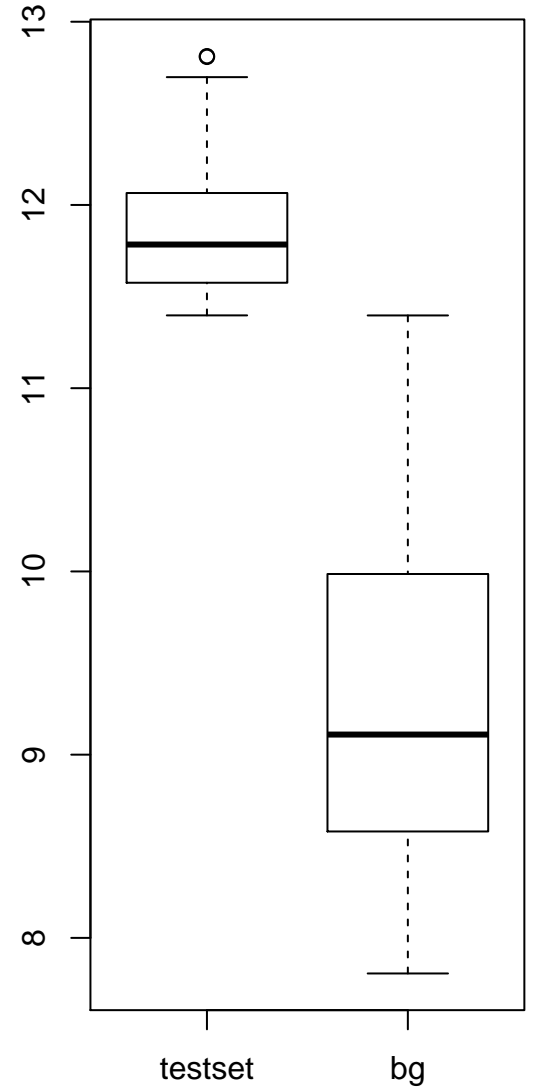

**Codon usage frequency spectrum normalized per aa per gene  
group starting from highest expression values #genes: 1967**

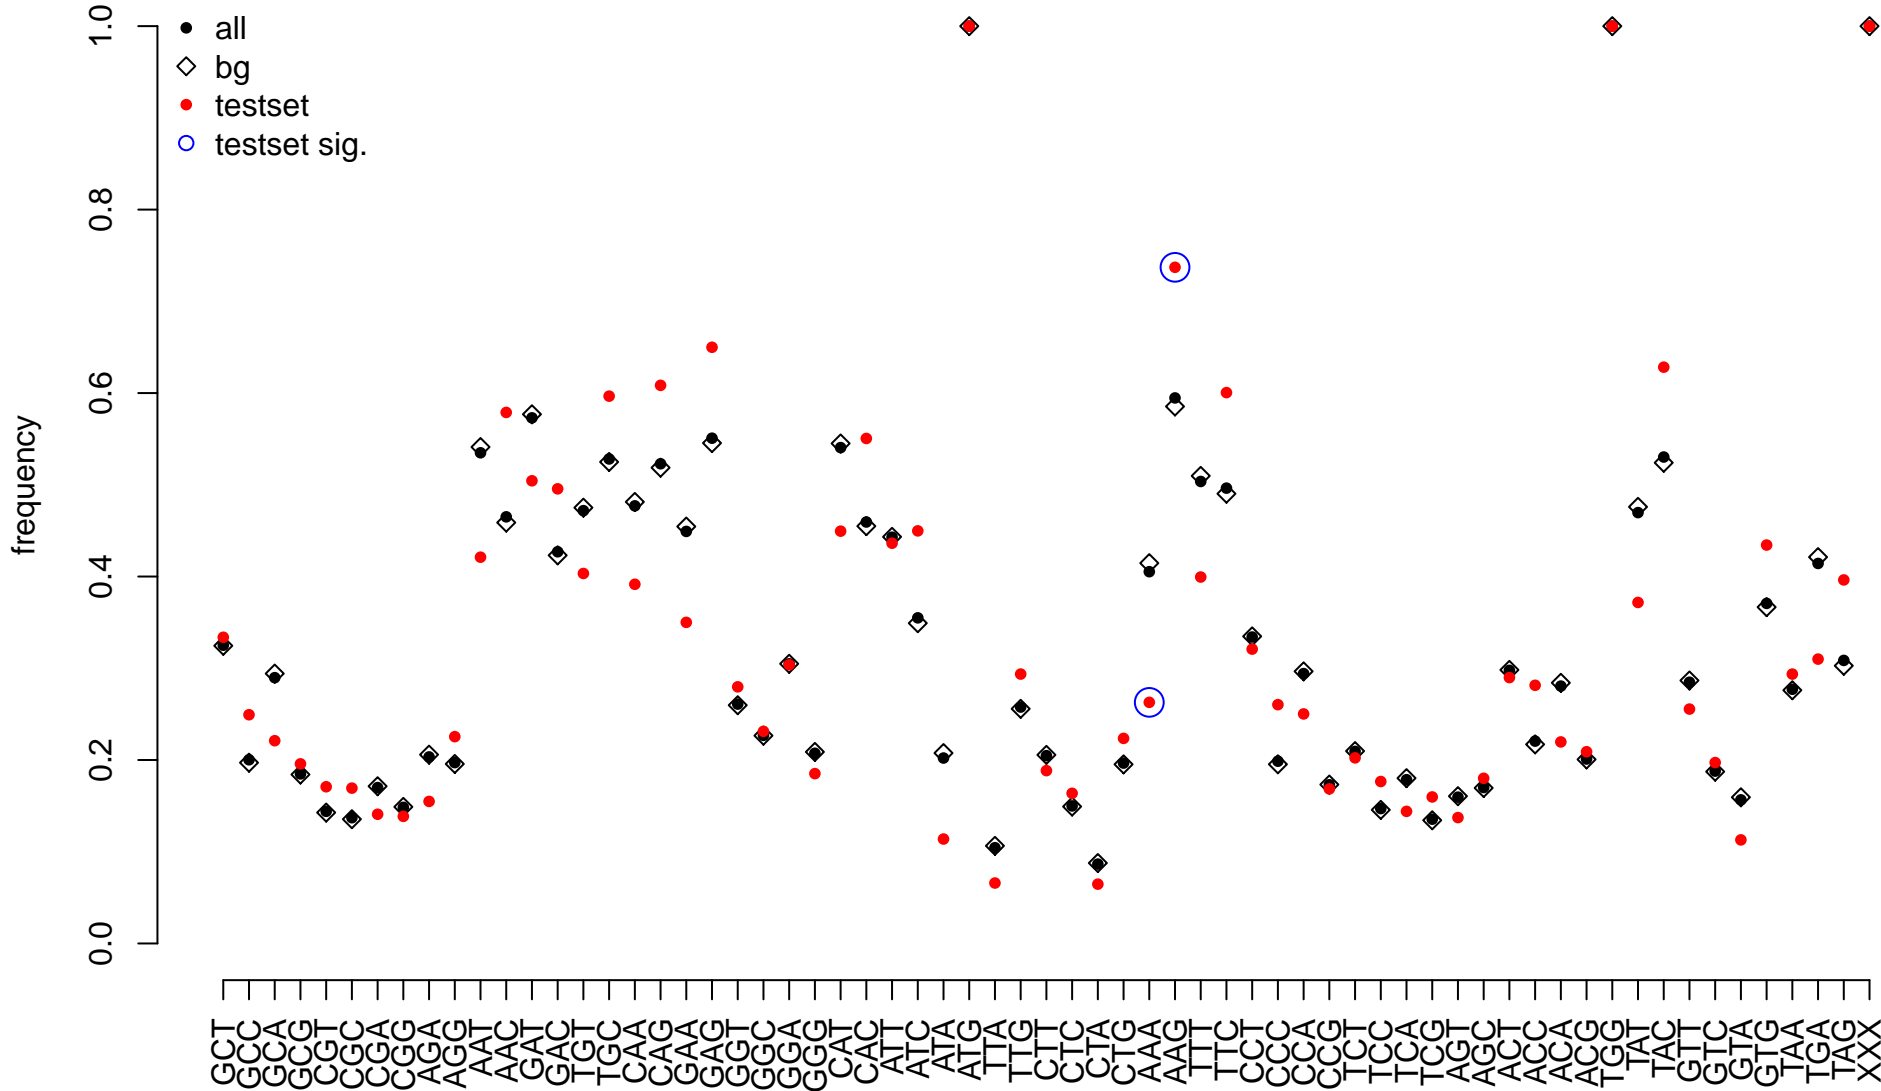

**median expression values  
#genes: 1967**

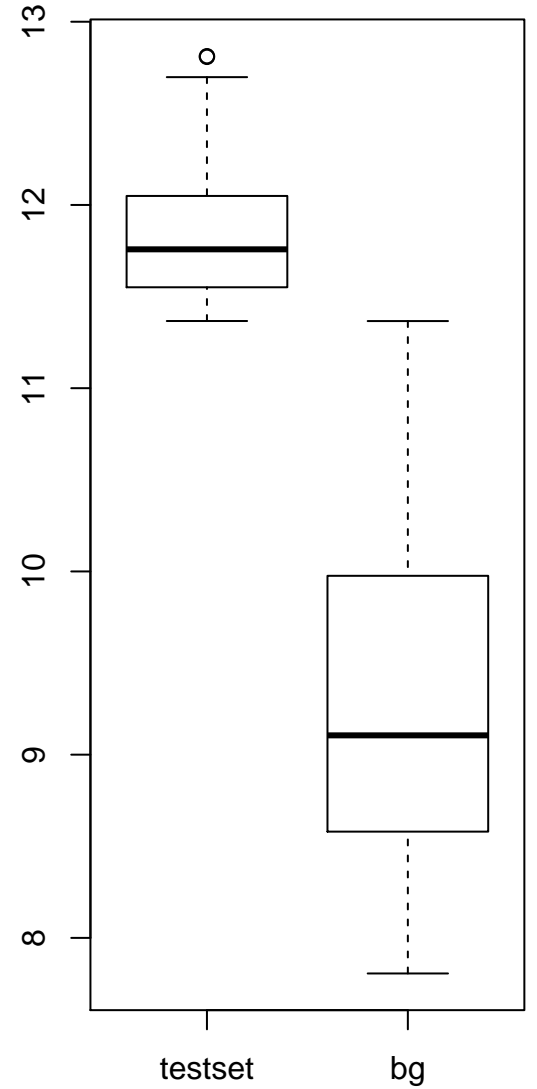

**Codon usage frequency spectrum normalized per aa per gene  
group starting from highest expression values #genes: 2067**

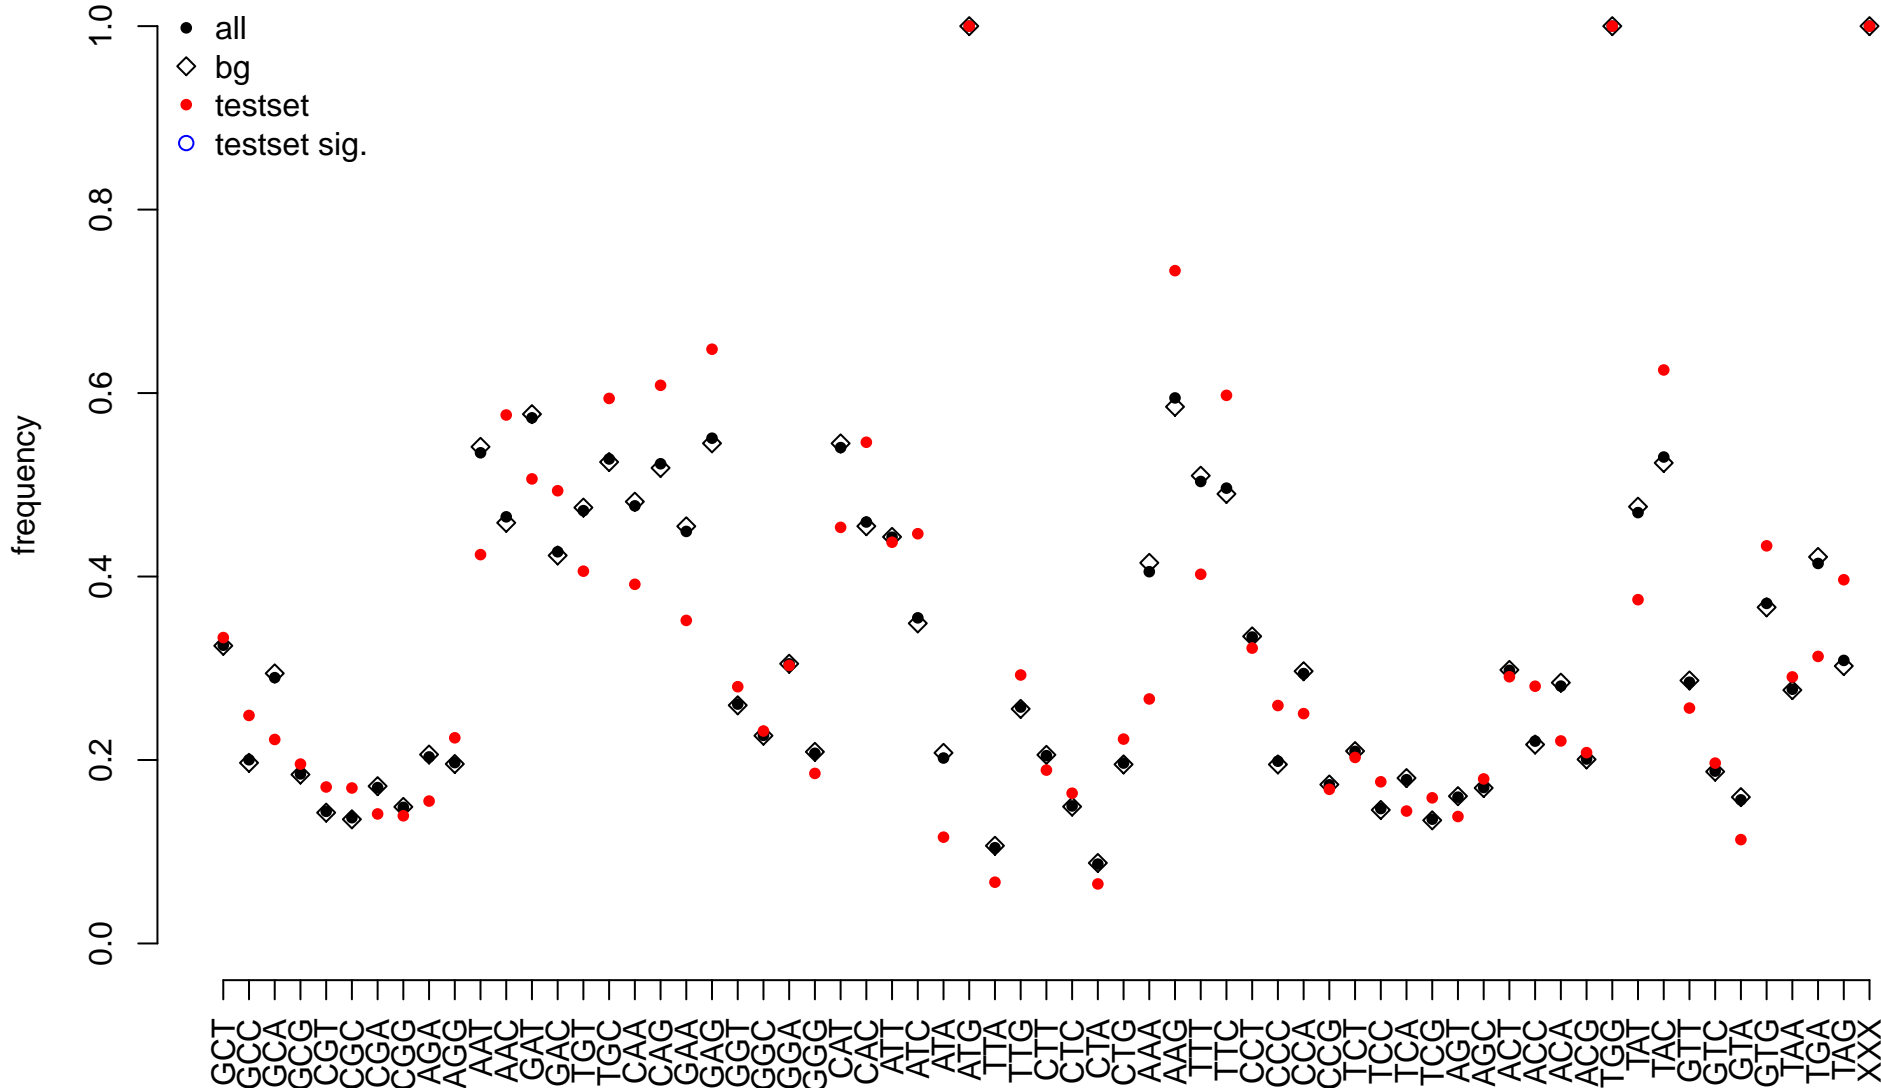

**median expression values  
#genes: 2067**

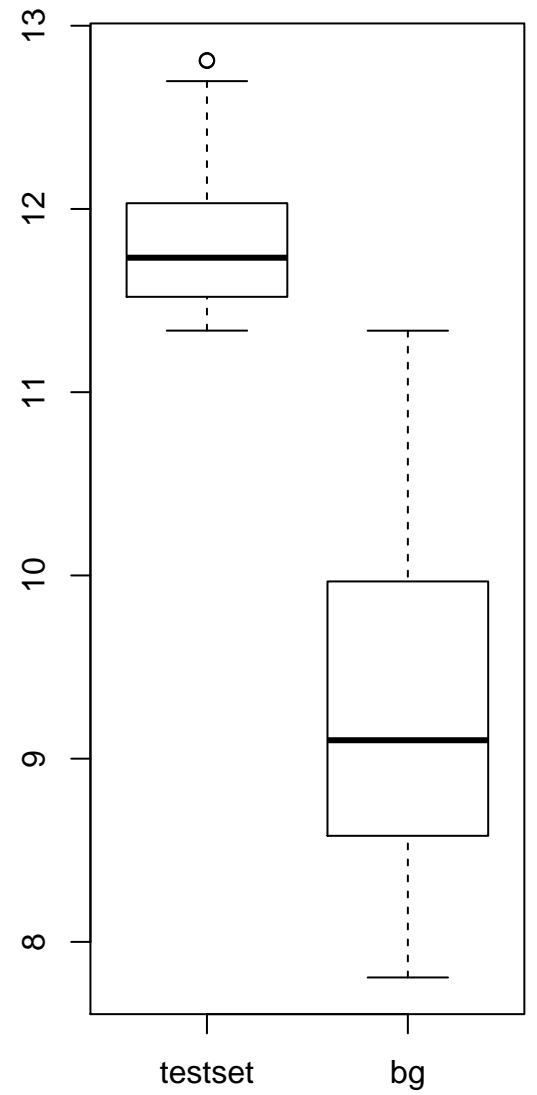

**Codon usage frequency spectrum normalized per aa per gene**  
**group starting from highest expression values #genes: 2167**

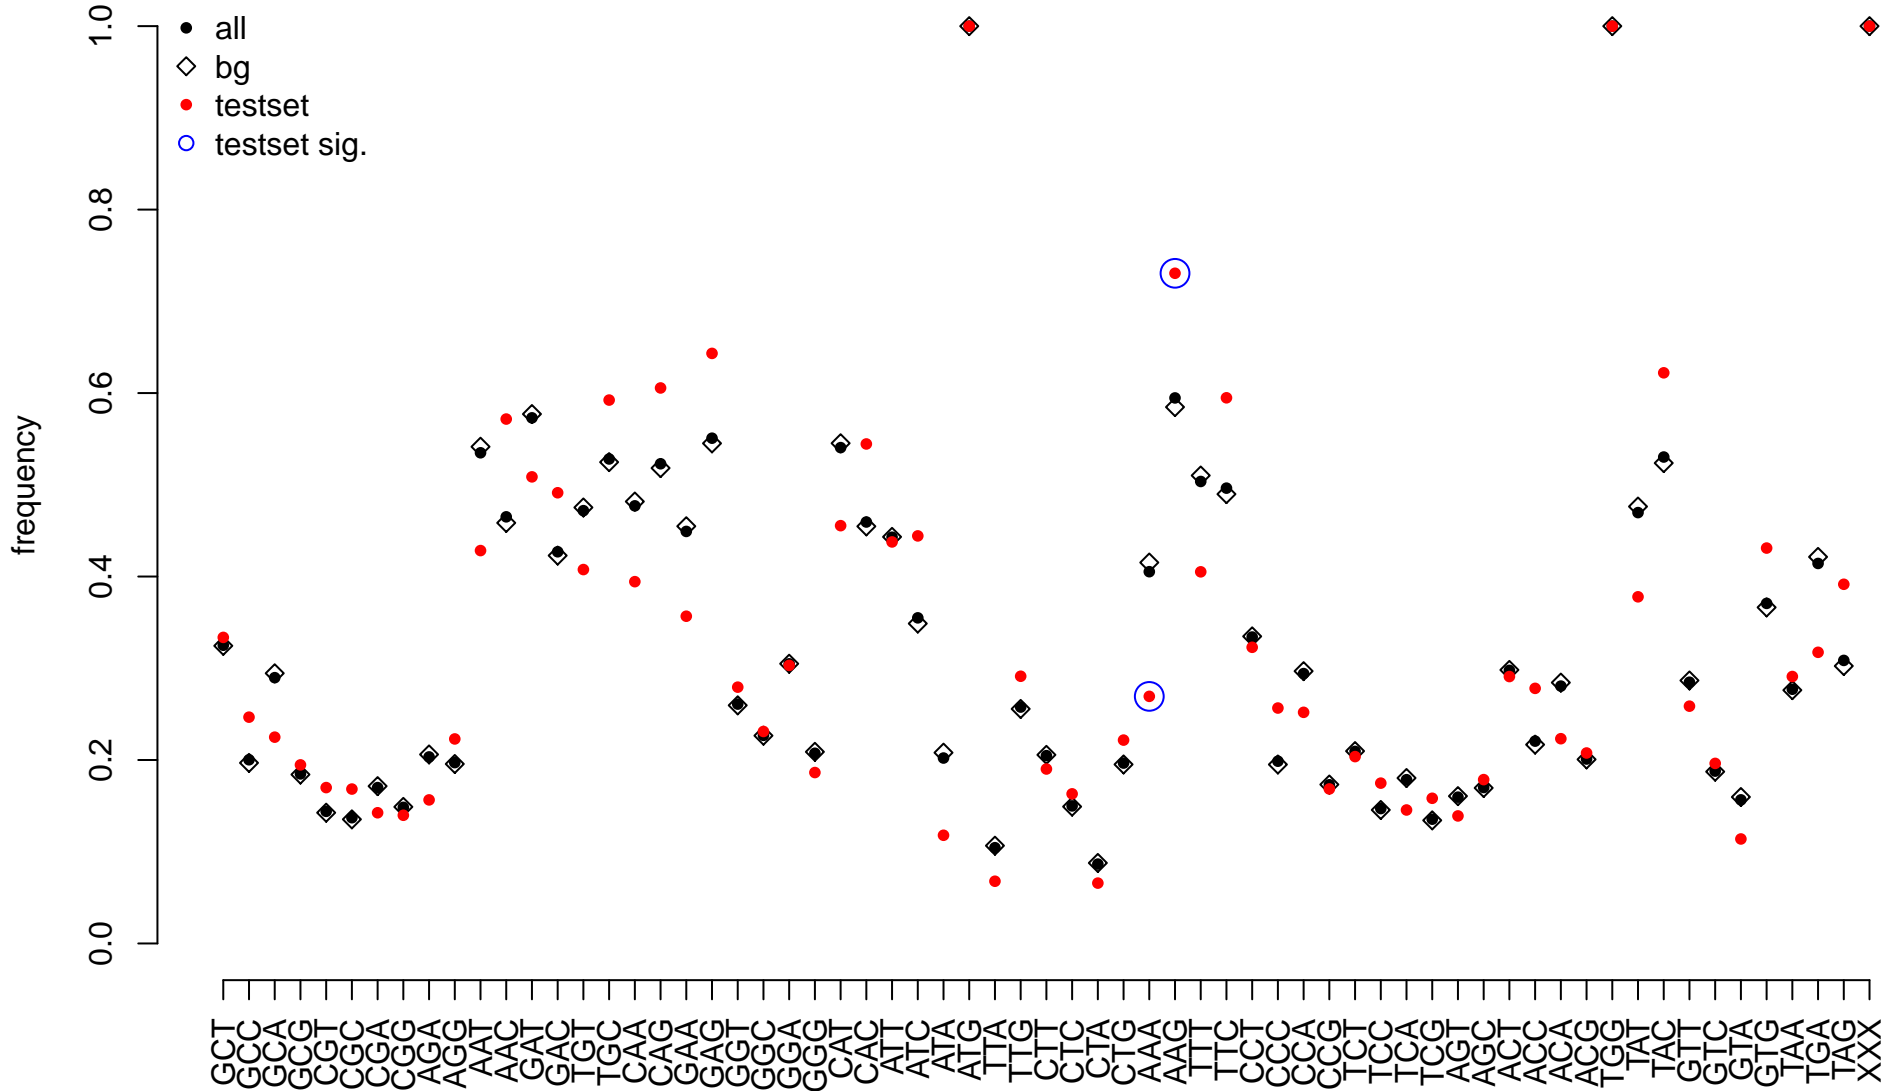

**median expression values**  
**#genes: 2167**

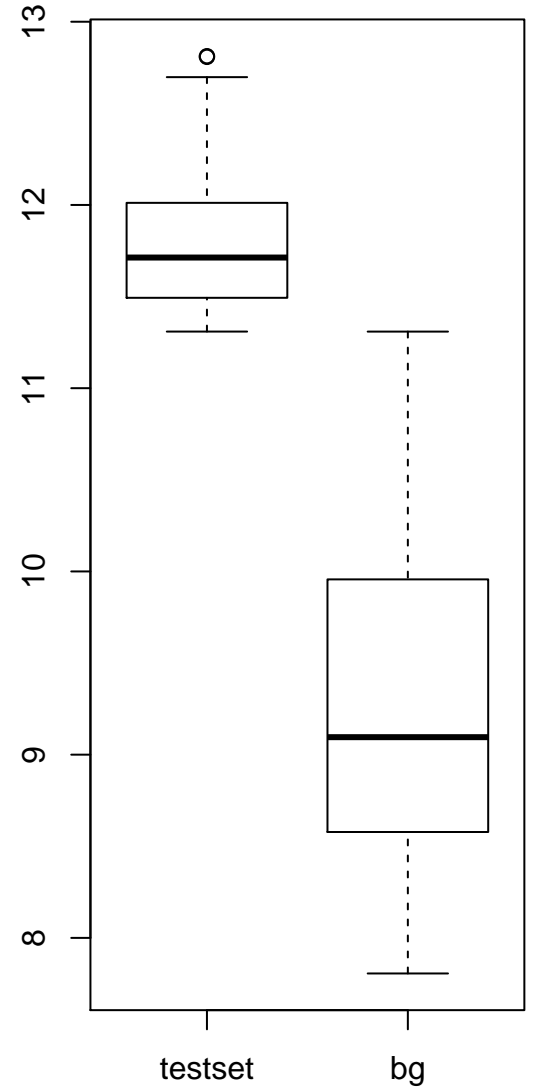

**Codon usage frequency spectrum normalized per aa per gene  
group starting from highest expression values #genes: 2265**

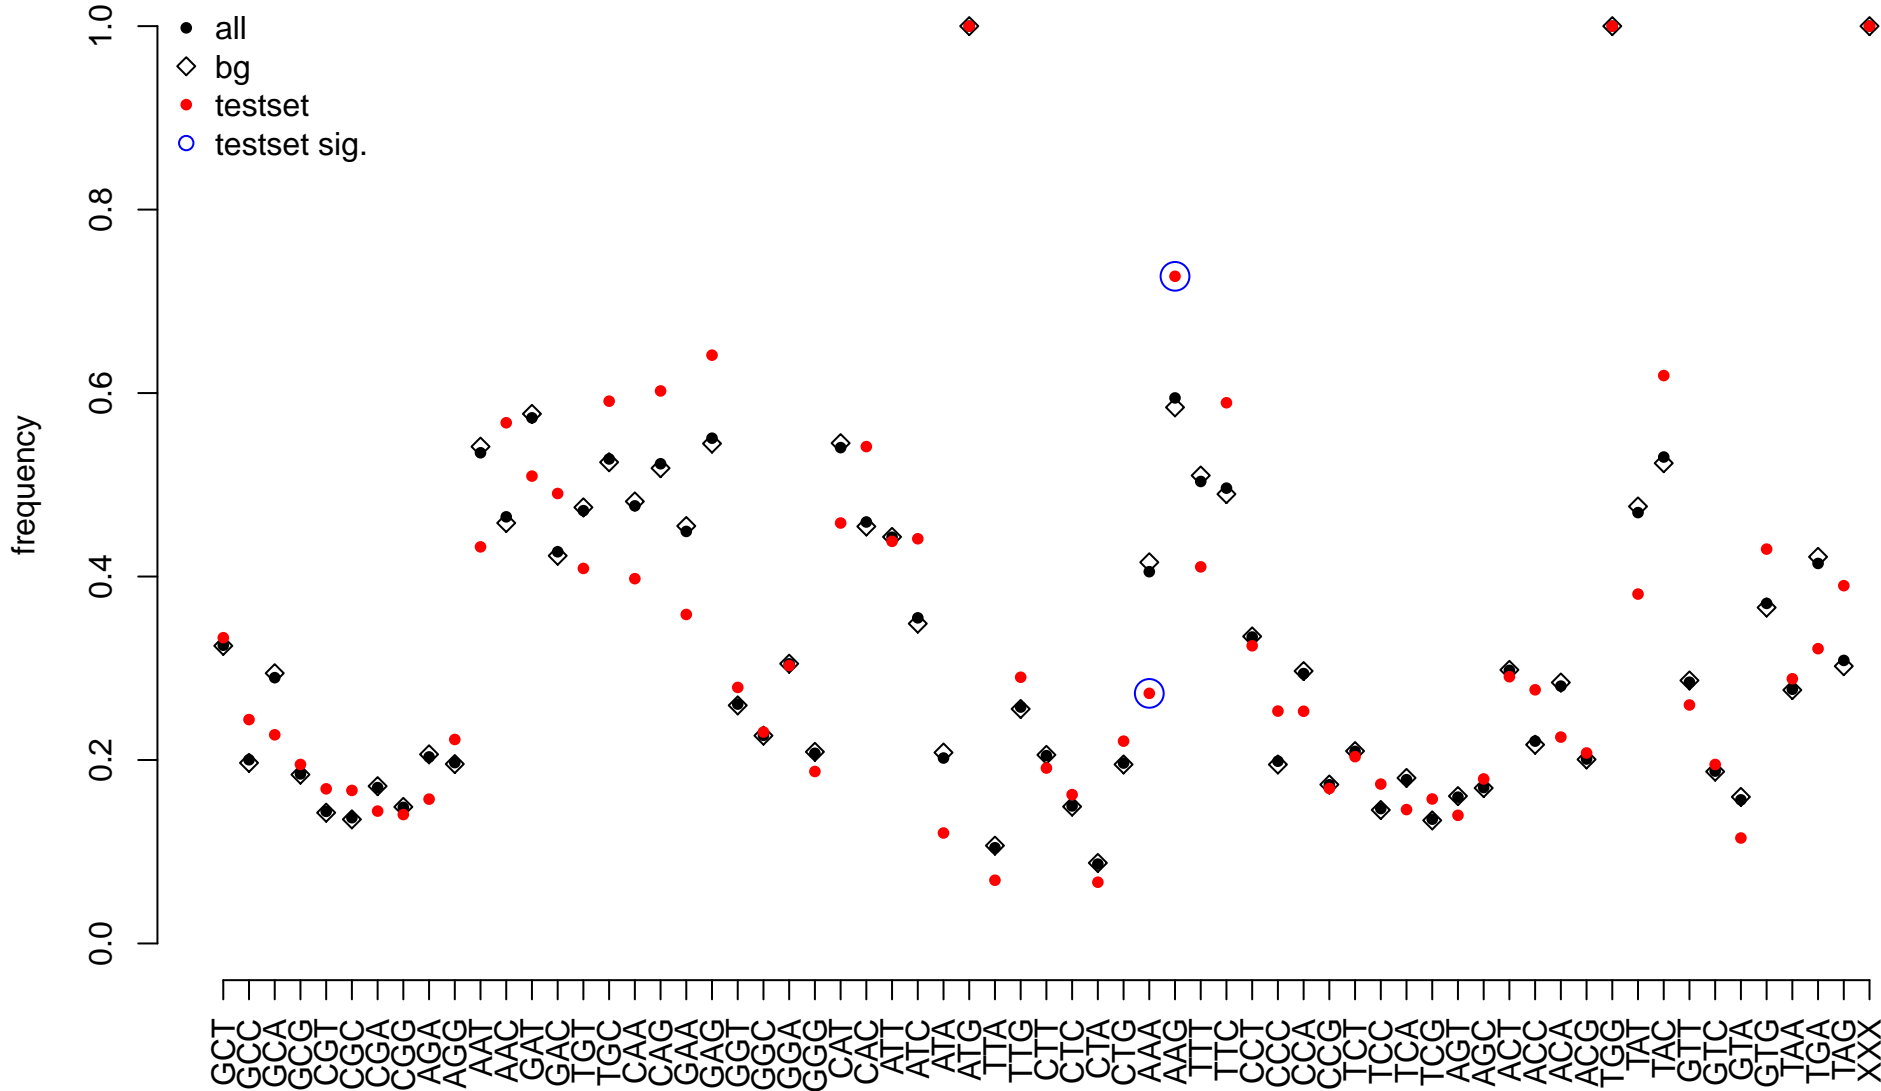

**median expression values  
#genes: 2265**

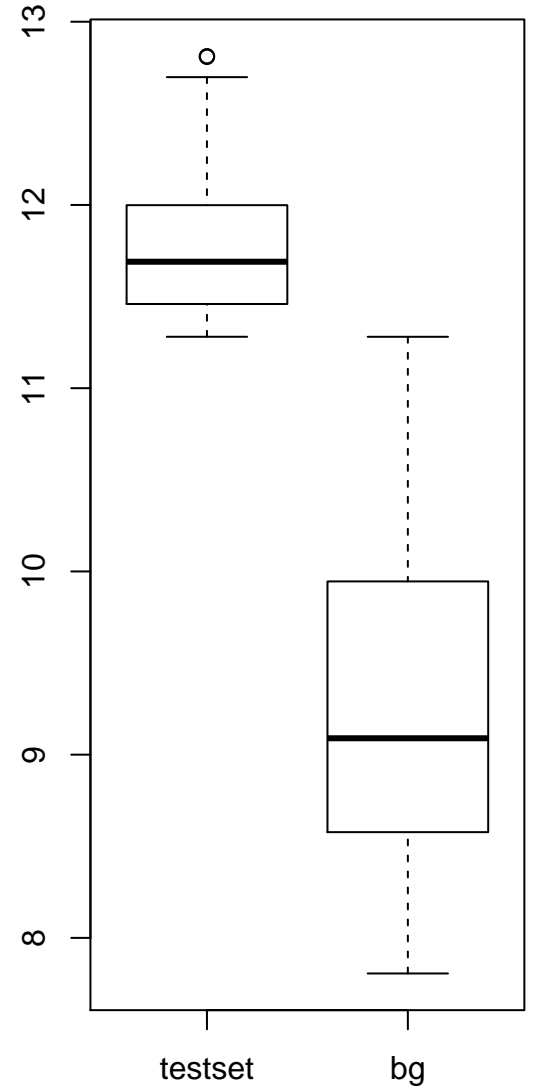



Codon usage frequency spectrum normalized per aa per gene  
group starting from highest expression values #genes: 2363

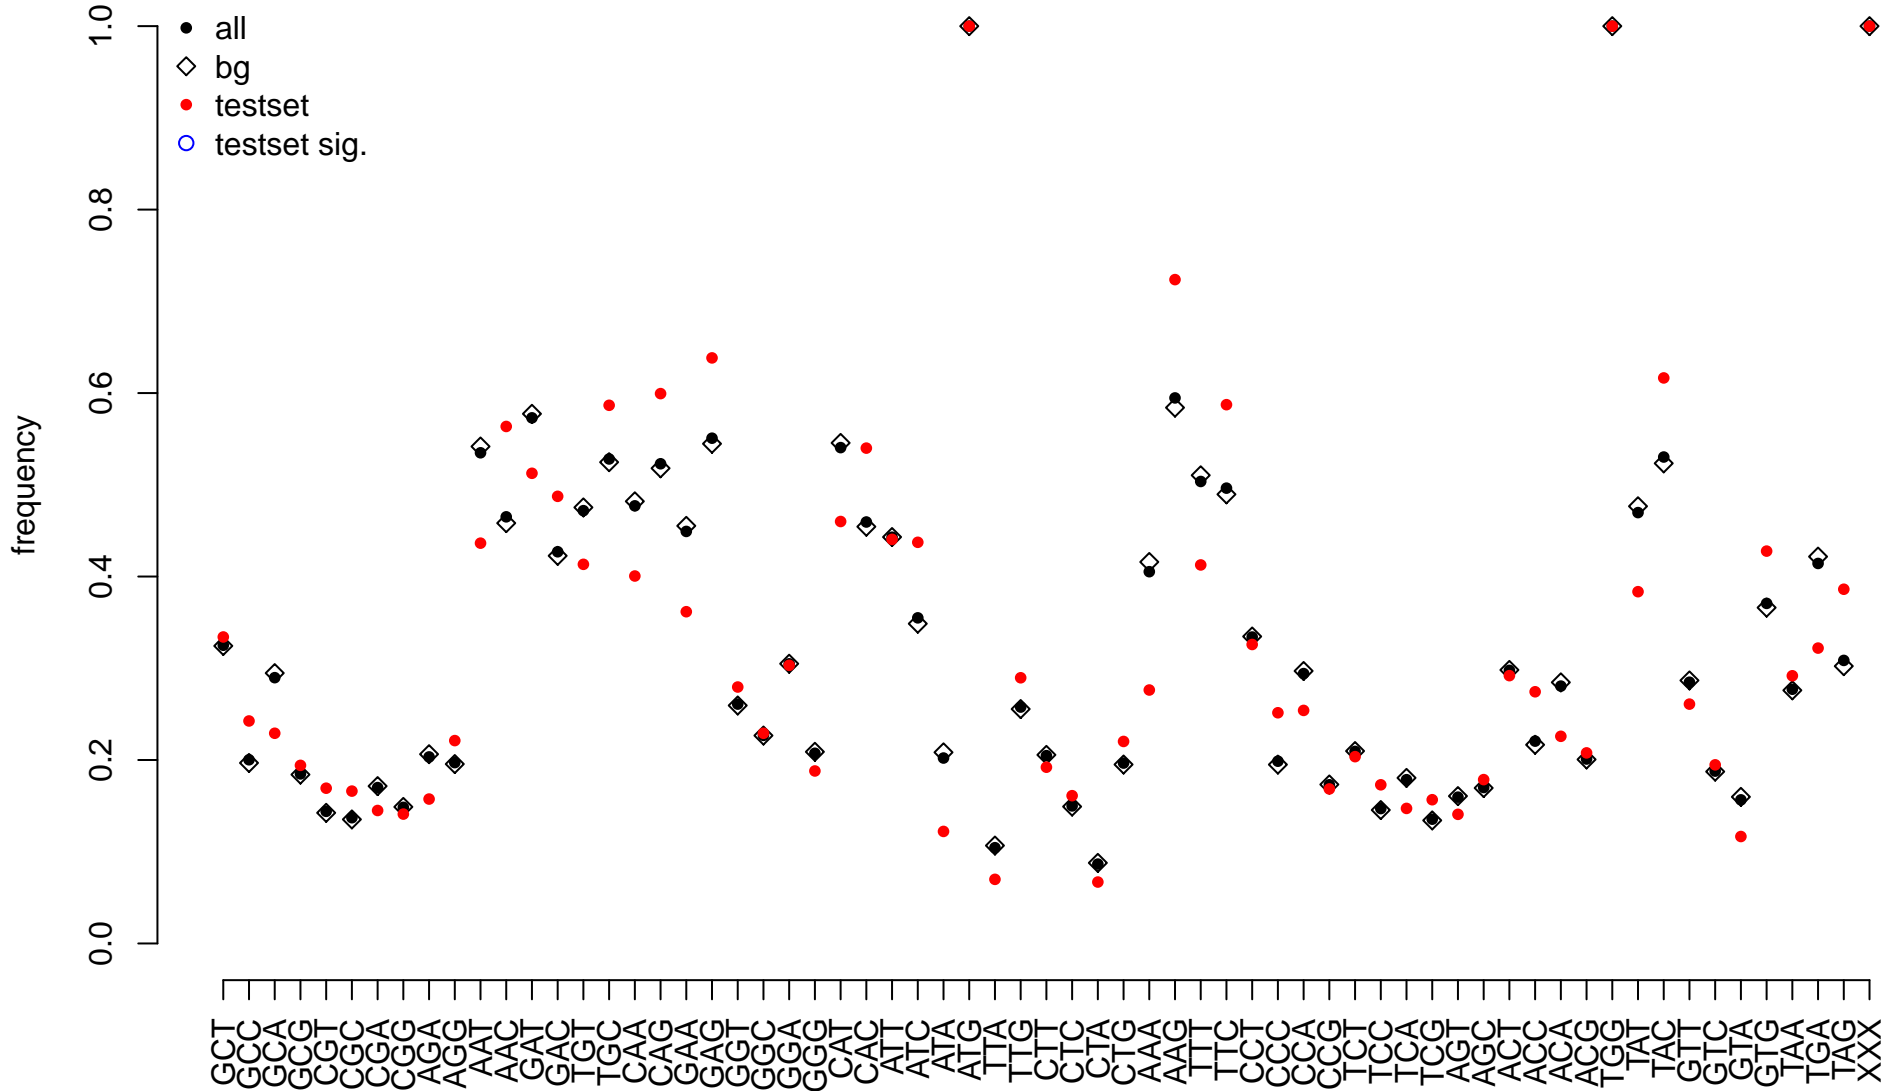

median expression values  
#genes: 2363

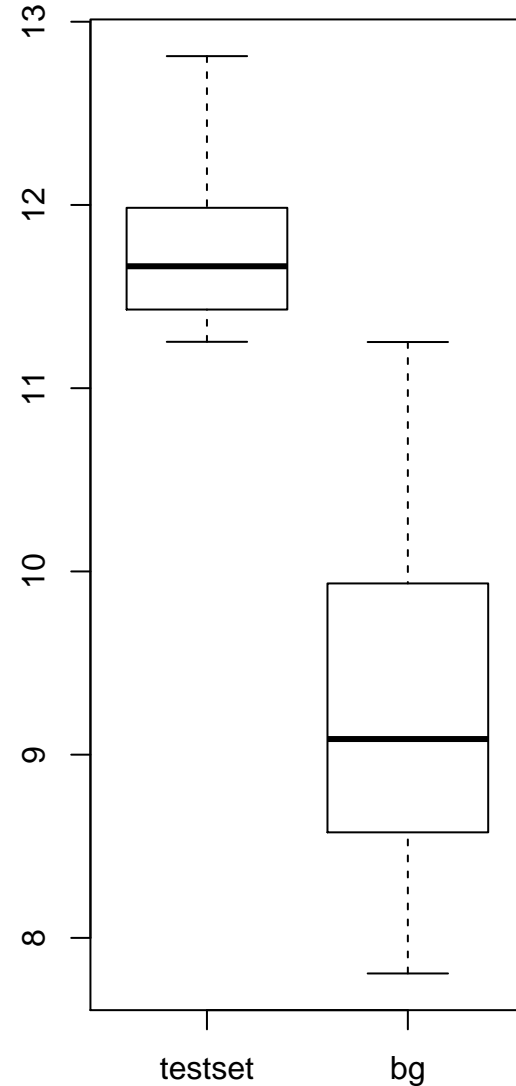

**Codon usage frequency spectrum normalized per aa per gene  
group starting from highest expression values #genes: 2462**

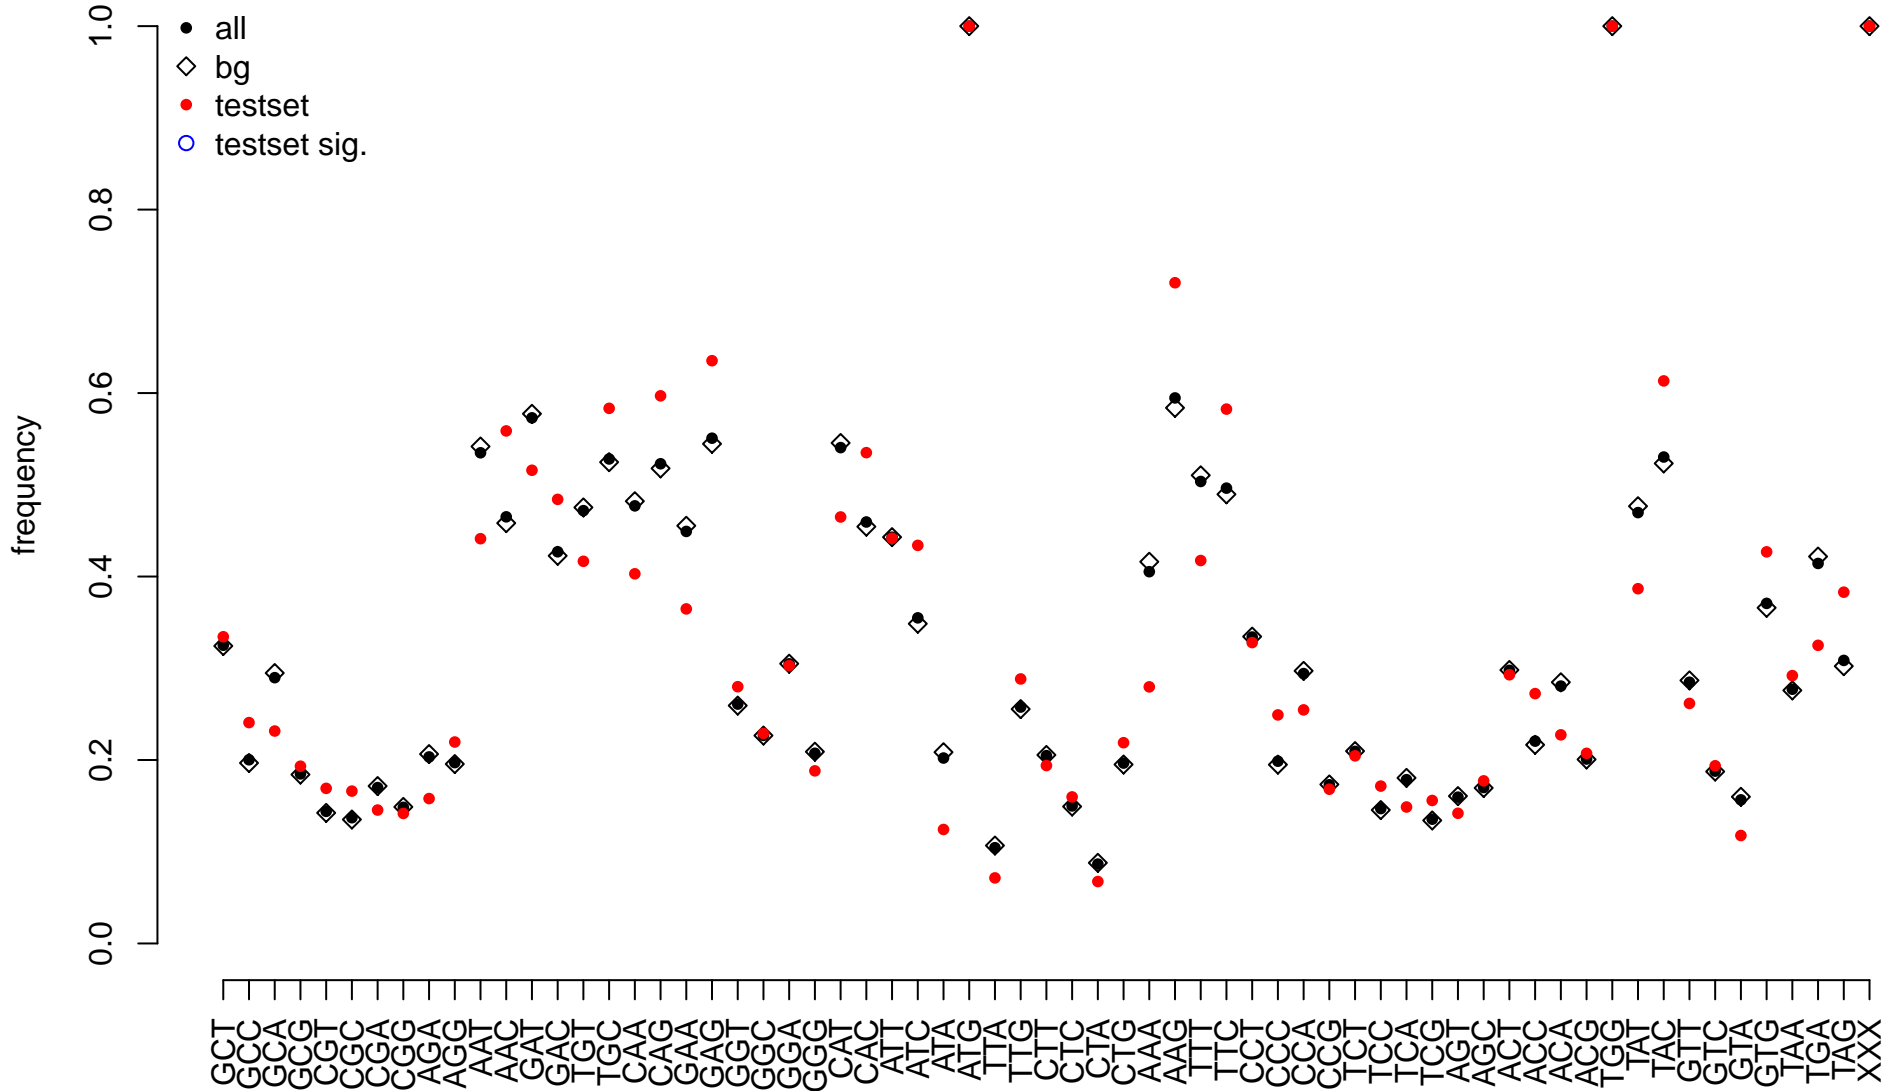

**median expression values  
#genes: 2462**

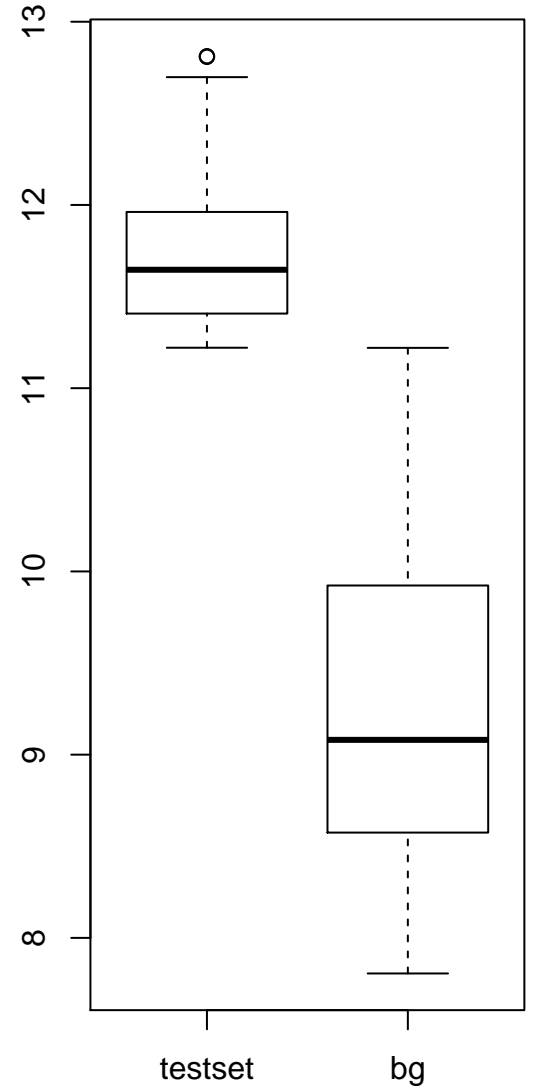

**Codon usage frequency spectrum normalized per aa per gene  
group starting from highest expression values #genes: 2559**

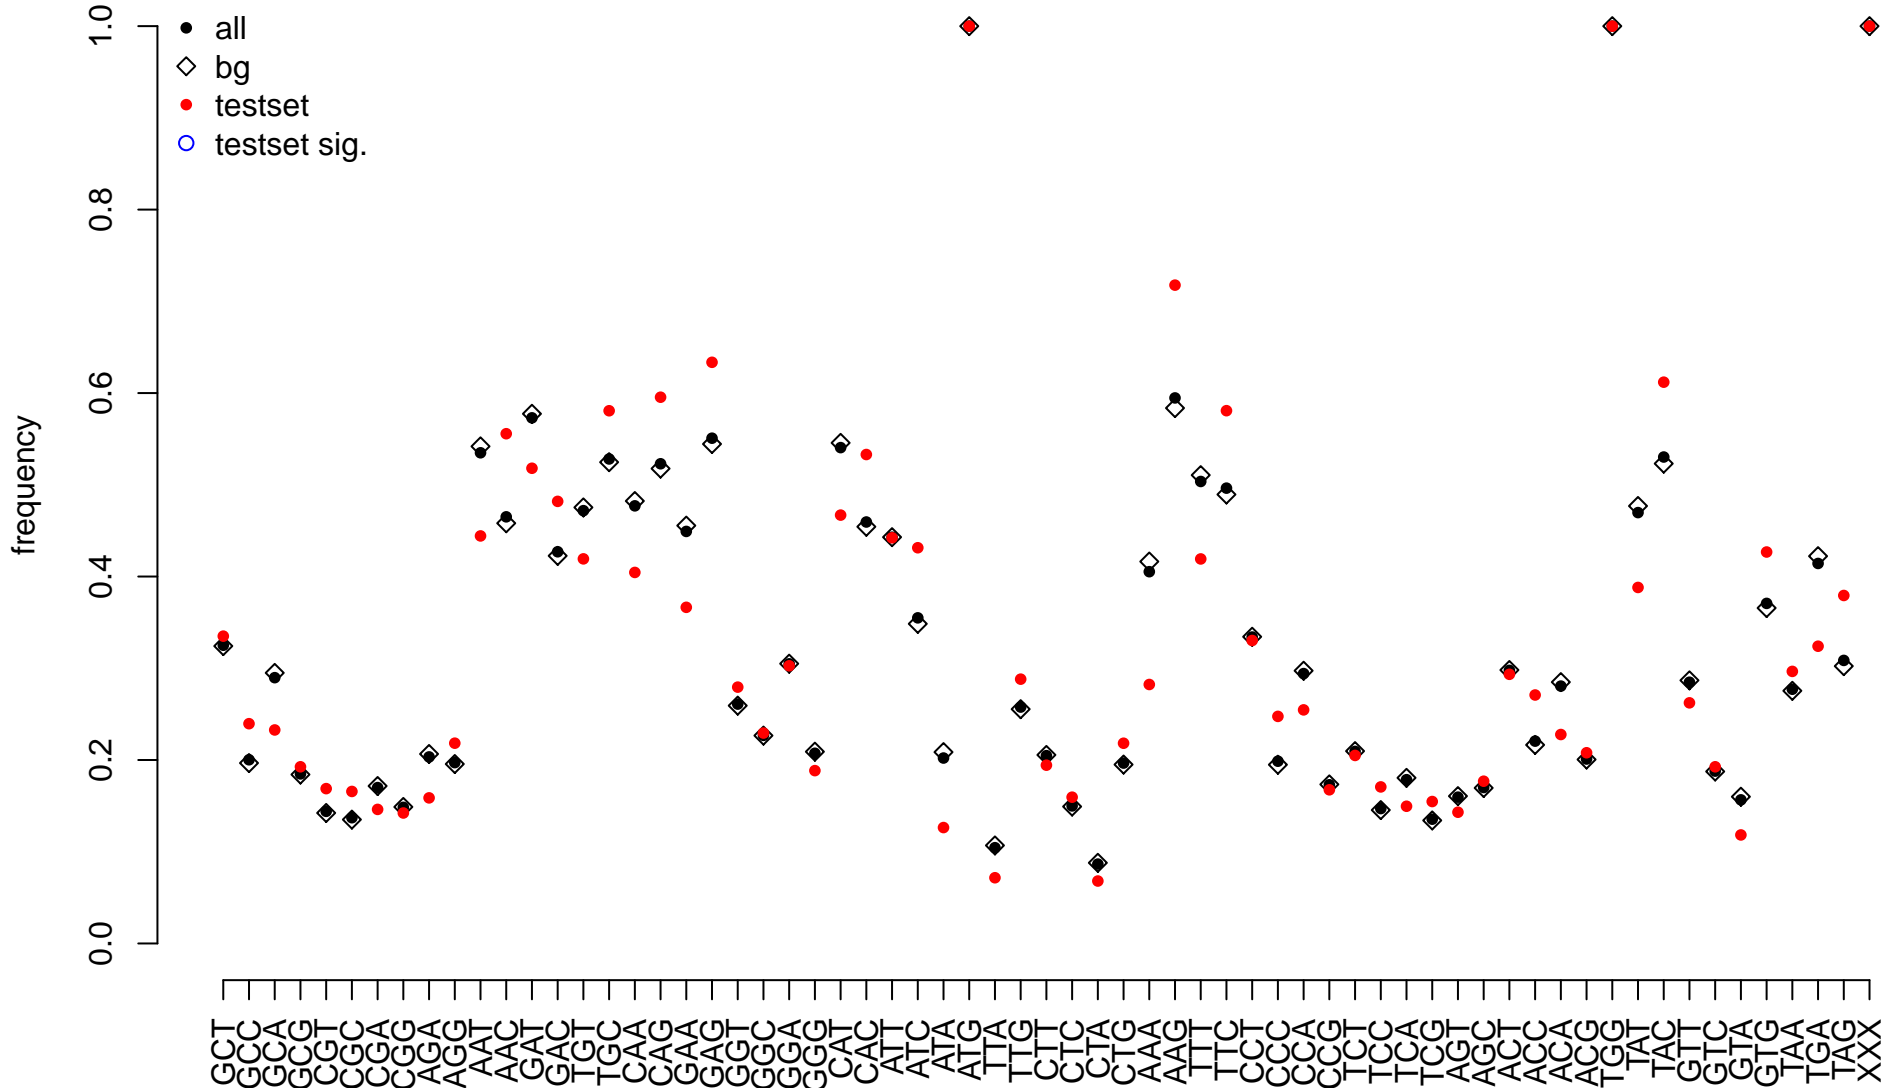

**median expression values  
#genes: 2559**

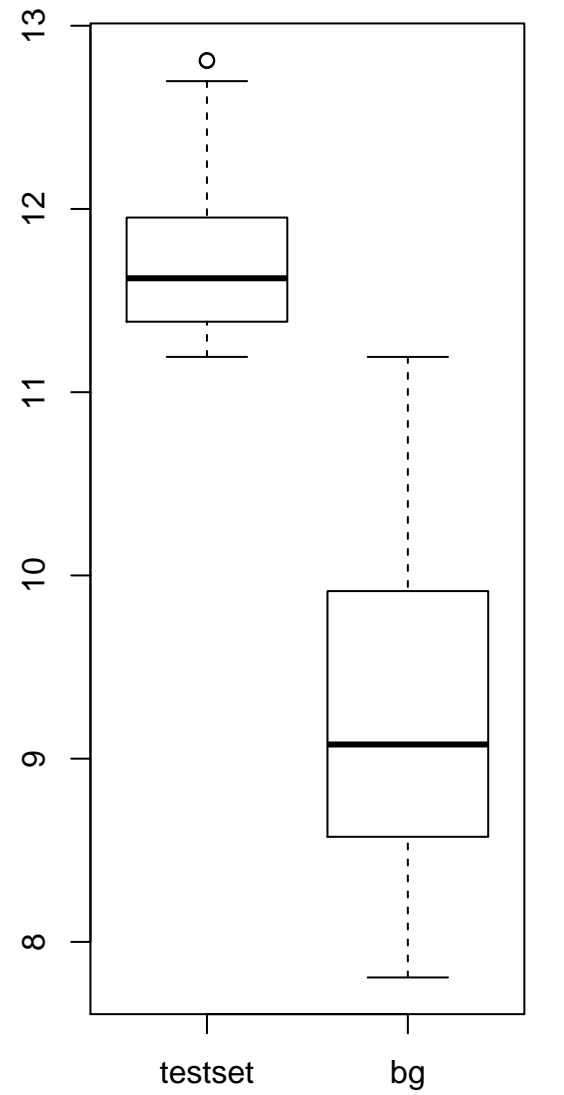

Codon usage frequency spectrum normalized per aa per gene  
group starting from highest expression values #genes: 2658

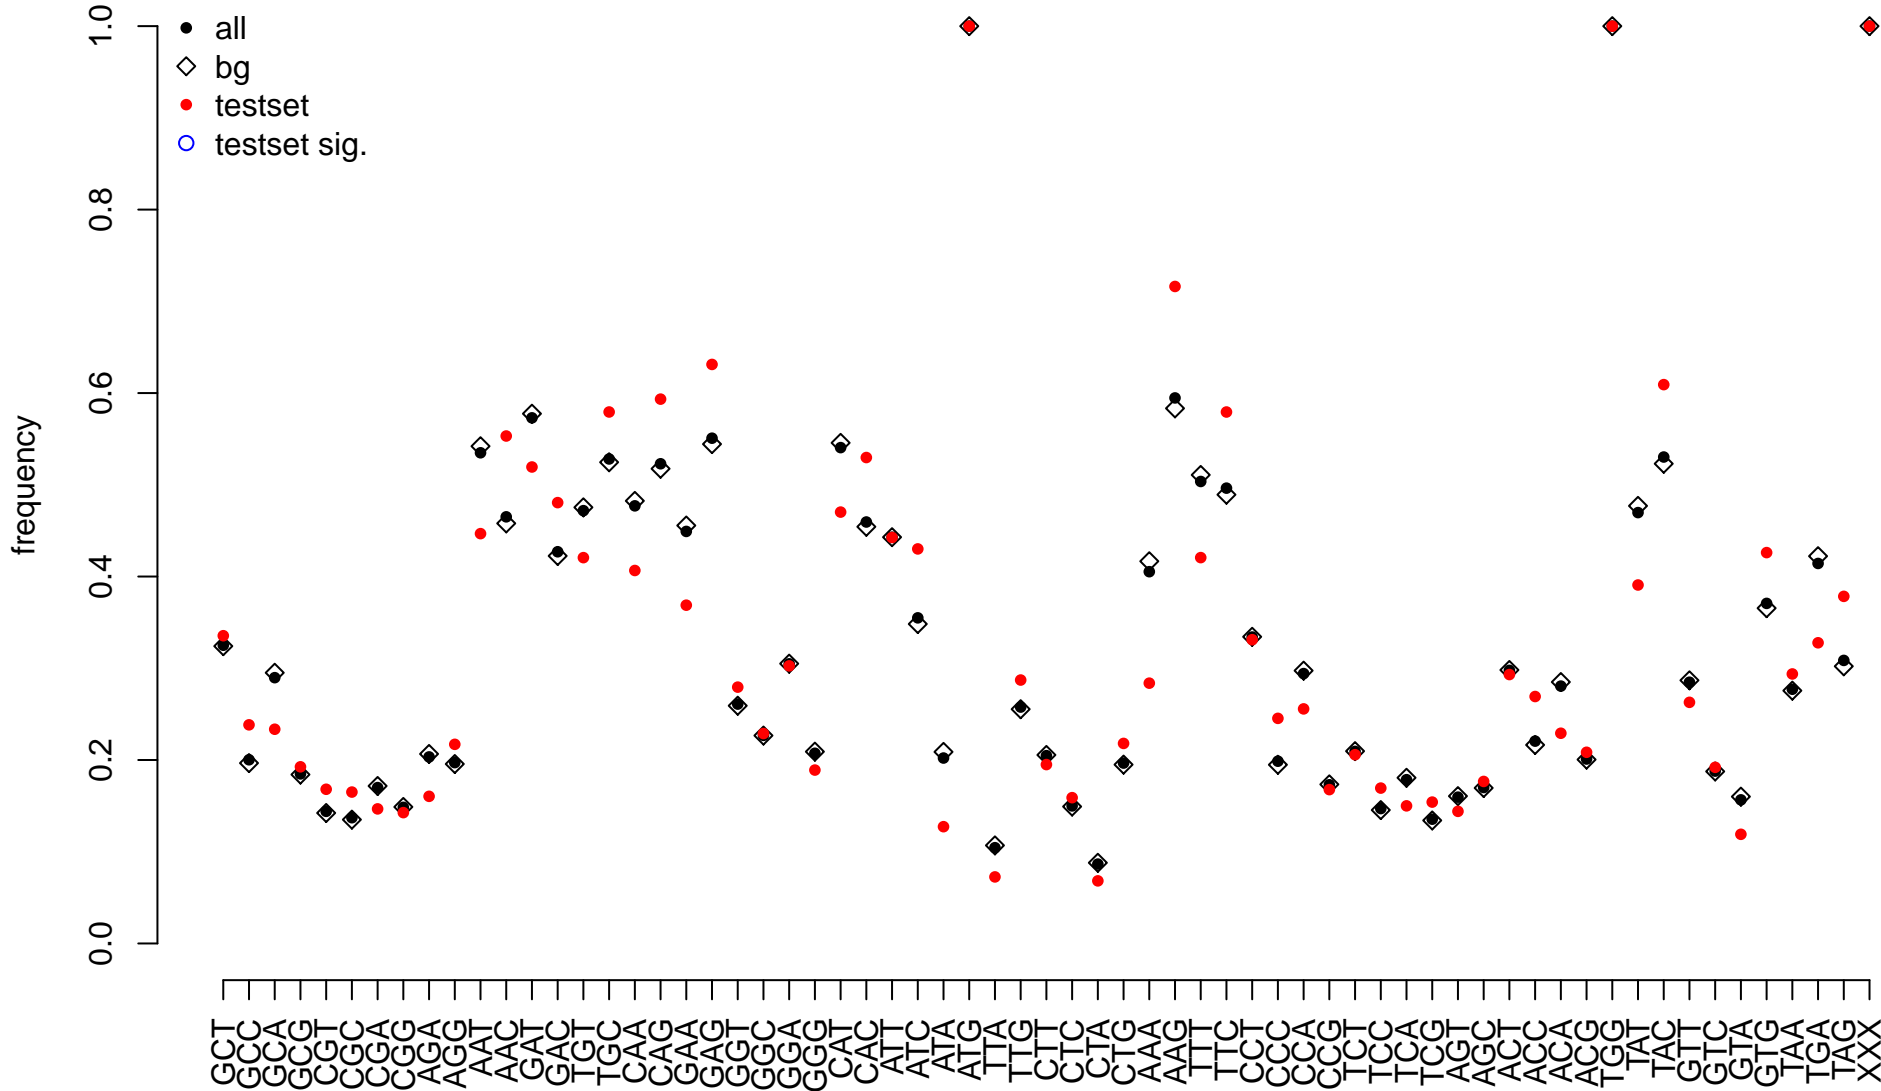

median expression values  
#genes: 2658

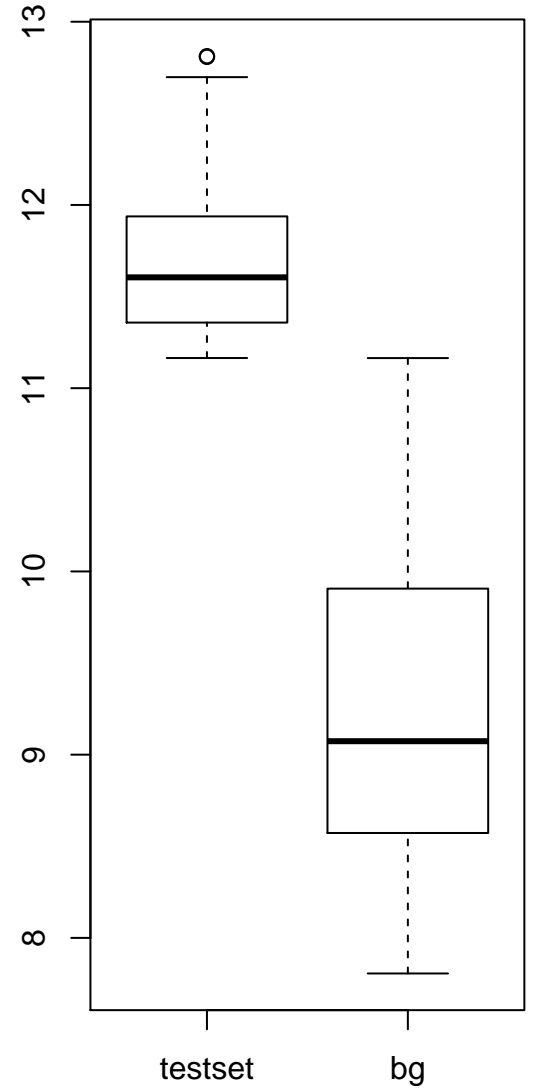

**Codon usage frequency spectrum normalized per aa per gene**  
**group starting from highest expression values #genes: 2757**

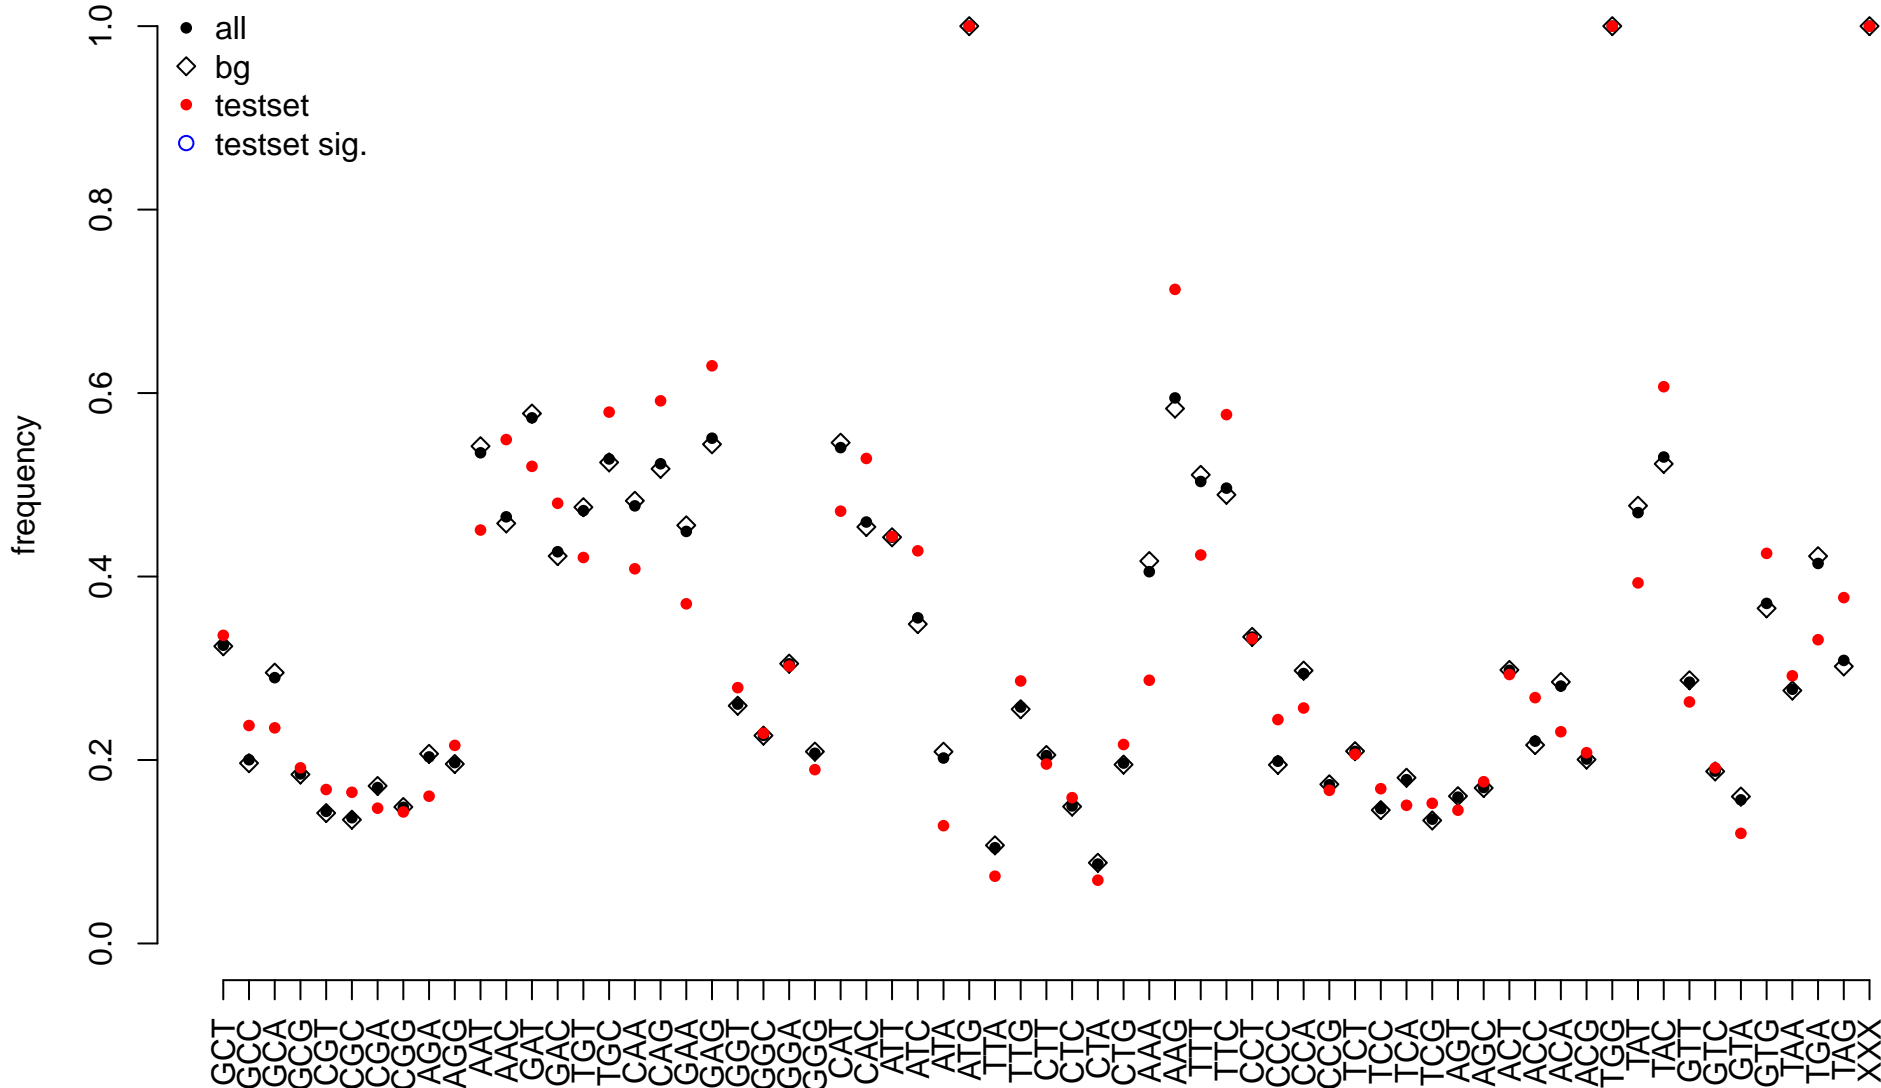

**median expression values**  
**#genes: 2757**

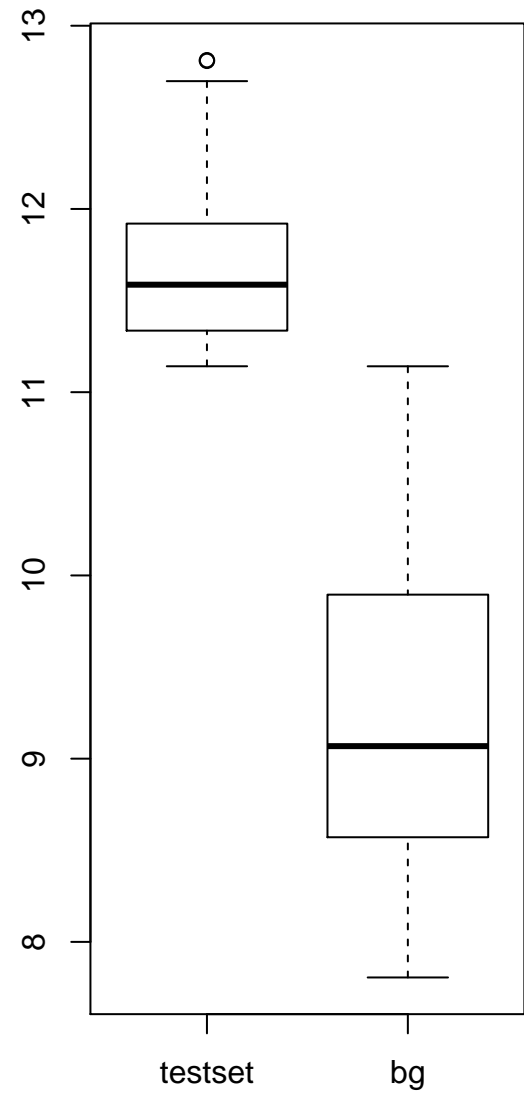

**Codon usage frequency spectrum normalized per aa per gene**  
**group starting from highest expression values #genes: 2855**

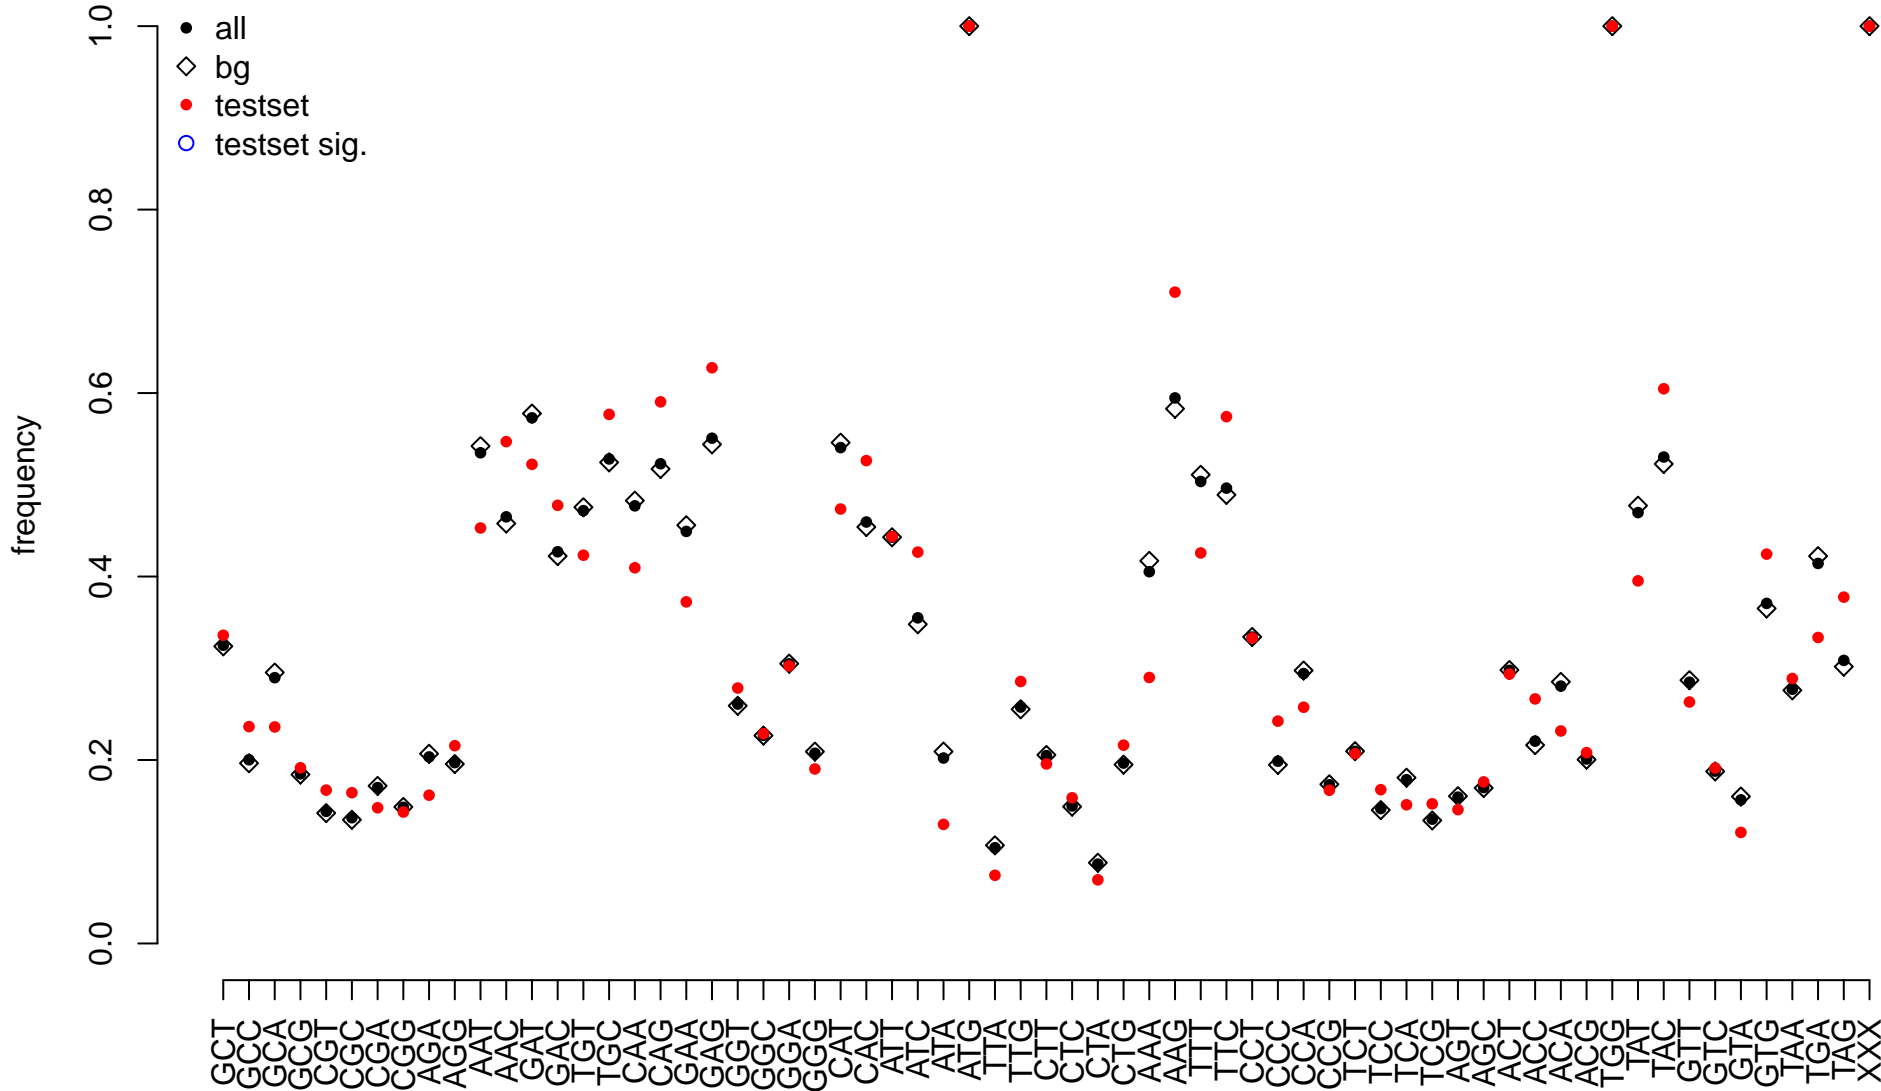

**median expression values**  
**#genes: 2855**

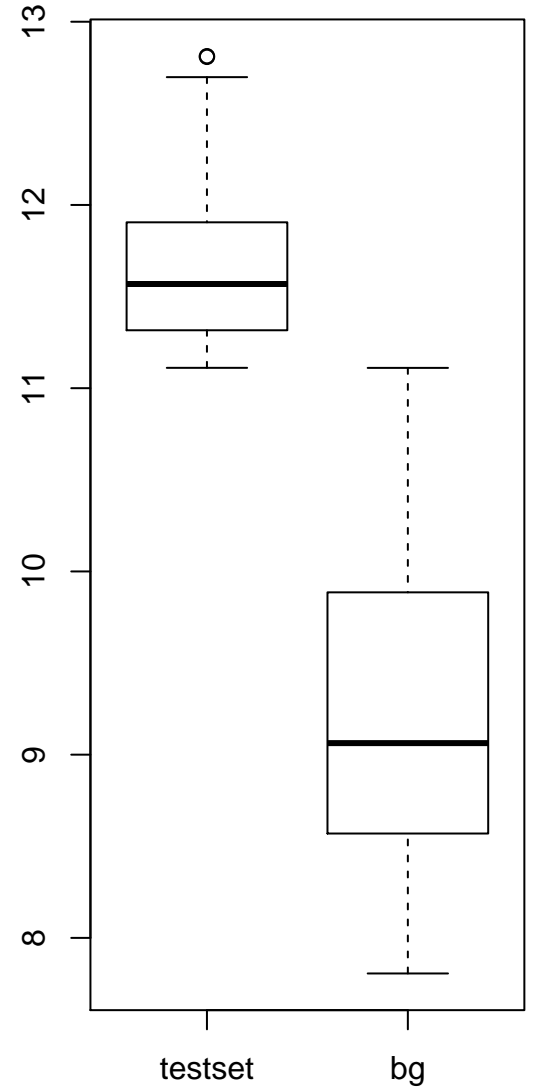

Supplement: File_2.pdf [file File_2.pdf]
